# Supplementary material for: A recyclable copper(ii) catalyst for the annulation of phenols with 1,3-dienes
Source: Royal Society of Chemistry journal article supplement (doi:10.1039/b719465j), 2008-01-01
Supplement: b719465j.pdf [file b719465j.pdf]

## Electronic Supplementary Material

### A Recyclable Copper(II) Catalyst for the Annulation of Phenols with 1,3-Dienes

Luis A. Adrio and King Kuok (Mimi) Hii

*Department of Chemistry, Imperial College London, Exhibition Road, South Kensington SW7 2AZ, United Kingdom.*

**General Experimental.** All precursors, catalysts and reagents were procured commercially and used as received. Catalytic reactions were generally performed in air, using a Radley's 12-place reaction carousel. All products were purified by column chromatography, using a mixture of CH<sub>2</sub>Cl<sub>2</sub> : n-hexane (15:85) as eluent. NMR spectra were recorded on Bruker AVANCE 400 MHz machines in CDCl<sub>3</sub> at room temperature. Melting points were recorded using an Electrothermal Gallenham apparatus, and were uncorrected. Infrared spectra were recorded using a Perkin Elmer Spectrum One Spectrometer, equipped with a beam-condensing accessory (samples were sandwiched between diamond compressor cells).

**Typical catalytic reaction:** A Radley's reaction tube was charged with a stir bar, phenol (1 mmol.), Cu(OTf)<sub>2</sub> (18 mg, 0.05 mmol.) and 2,2'-bipyridyl (4 mg, 0.025 mmol.). DCE (1 mL) was added, followed by the corresponding diene (1.5 mmol.). The tube was positioned in a carousel and left to stir at 50 °C for 18 h, before it was centrifuged. The decanted liquid was evaporated and purified by column chromatography.

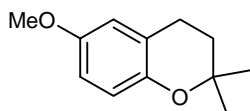

**6-Methoxy-2,2-dimethyl-chroman (1).**<sup>1</sup> Pale yellow oil.  $\delta_{\text{H}}$  (CDCl<sub>3</sub>, 400 MHz): 1.33 (6H, s), 1.80 (2H, t,  $J = 6.8$  Hz), 2.77 (2H, t,  $J = 6.8$  Hz), 3.76 (3H, s), 6.63 (1H, d,  $J = 2.8$  Hz), 6.70 (1H, dd,  $J = 2.8, 8.8$  Hz), 6.72 (1H, d,  $J = 8.8$  Hz).  $\delta_{\text{C}}$  (CDCl<sub>3</sub>, 100.6 MHz): 22.8 (CH<sub>2</sub>), 26.7 (2 x CH<sub>3</sub>), 32.8 (CH<sub>2</sub>), 55.7 (CH<sub>3</sub>), 73.8 (C), 113.4 (CH), 113.9 (CH), 117.7 (CH), 121.4 (C), 148.0 (C), 152.9 (C).  $\nu_{\text{max}}/\text{cm}^{-1}$ : 2974, 2930, 1612, 1497, 1382, 1367, 1247, 1202, 1157, 1123, 1042, 947, 890, 844, 812, 723.  $m/z$  (EI) 192 (M<sup>+</sup>, 100%), 177 (27), 137 (92), 108 (25).

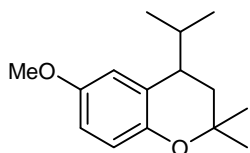

**6-Methoxy-2,2-dimethyl-4-isopropyl-chroman (2).** Yellow-orange oil.  $\delta_{\text{H}}$  (CDCl<sub>3</sub>, 400 MHz): 0.69 (3H, d,  $J = 6.8$  Hz), 1.07 (3H, d,  $J = 6.9$  Hz), 1.19 (3H, s), 1.43 (3H, s), 1.64 (2H, m), 2.48 (1H, m), 2.86 (1H, m), 3.76 (3H, s), 6.67 (1H, dd,  $J = 2.8, 8.8$  Hz), 6.72 (1H, d,  $J = 8.8$  Hz), 6.80 (1H, d,  $J = 2.8$  Hz).  $\delta_{\text{C}}$  (CDCl<sub>3</sub>, 100.6 MHz): 15.6 (CH<sub>3</sub>), 20.7 (CH<sub>3</sub>), 23.7 (CH<sub>3</sub>), 29.3 (CH<sub>3</sub>), 30.5 (CH), 32.4 (CH<sub>2</sub>), 36.9 (CH), 55.7 (CH<sub>3</sub>), 73.9 (C), 112.3 (CH), 112.6 (CH), 117.9 (CH), 125.5 (C), 148.5 (C), 153.3 (C).  $\nu_{\text{max}}/\text{cm}^{-1}$ : 2954, 1614, 1496, 1466, 1426, 1383, 1368, 1276, 1249, 1202, 1179, 1153, 1114, 1088, 1046, 934, 913, 867, 806, 775.  $m/z$  (EI) 234 (M<sup>+</sup>, 54%), 191 (100), 163 (24), 137 (29).

Compounds **3** and **4** were obtained as a mixture from the reaction, which are separated by column chromatography.

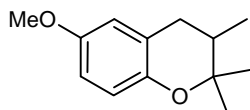

**6-Methoxy-2,2,3-trimethyl-chroman (3).** Yellow oil.  $\delta_{\text{H}}$  ( $\text{CDCl}_3$ , 400 MHz): 1.00 (3H, d,  $J = 6.9$  Hz), 1.14 (3H, s), 1.37 (3H, s), 1.90 (1H, m), 2.44 (1H, dd,  $J = 10.1, 16.8$  Hz), 2.73 (1H, dd,  $J = 5.5, 16.8$  Hz), 3.74 (3H, s), 6.58 (1H, d,  $J = 2.8$  Hz), 6.67 (1H, dd,  $J = 2.8, 8.8$  Hz), 6.71 (1H, d,  $J = 8.8$  Hz).  $\delta_{\text{C}}$  ( $\text{CDCl}_3$ , 100.6 MHz): 16.6 ( $\text{CH}_3$ ), 20.0 ( $\text{CH}_3$ ), 27.4 ( $\text{CH}_3$ ), 31.4 ( $\text{CH}_2$ ), 35.5 (CH), 55.7 ( $\text{CH}_3$ ), 77.2 (C), 113.2 (CH), 113.8 (CH), 117.5 (CH), 122.1 (C), 147.7 (C), 152.9 (C).  $\nu_{\text{max}}/\text{cm}^{-1}$ : 2975, 2938, 2907, 2833, 1614, 1497, 1466, 1431, 1368, 1261, 1228, 1151, 1043, 943, 878, 811, 745.  $m/z$  (EI) 206 ( $\text{M}^+$ , 90%), 163 (73), 137 (100), 108 (17).

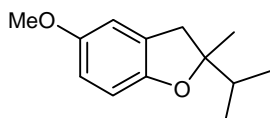

**5-Methoxy-2-isopropyl-2-methyl-chroman (4).** Orange-brown oil.  $\delta_{\text{H}}$  ( $\text{CDCl}_3$ , 400 MHz): 0.94 (3H, d,  $J = 6.8$  Hz), 0.99 (3H, d,  $J = 6.8$  Hz), 1.33 (3H, s), 1.99 (1H, septet,  $J = 6.8$  Hz), 2.77 (1H, d,  $J = 15.7$  Hz), 3.12 (1H, d,  $J = 15.7$  Hz), 3.75 (3H, s), 6.61-6.70 (2H, m), 6.73 (1H, m).  $\delta_{\text{C}}$  ( $\text{CDCl}_3$ , 100.6 MHz): 17.4 ( $\text{CH}_3$ ), 17.5 ( $\text{CH}_3$ ), 23.2 ( $\text{CH}_3$ ), 37.0 (CH), 39.4 ( $\text{CH}_2$ ), 56.0 ( $\text{CH}_3$ ), 91.7 (C), 109.0 (CH), 111.4 (CH), 112.7 (CH), 128.0 (C), 153.3 (C), 153.6 (C).  $\nu_{\text{max}}/\text{cm}^{-1}$ : 2969, 2941, 2910, 2878, 2832, 1604, 1491, 1467, 1432, 1374, 1236, 1141, 1035, 900, 859, 810, 774, 729.  $m/z$  (EI) 206 ( $\text{M}^+$ , 77%), 163 (100), 137 (72), 108 (16).

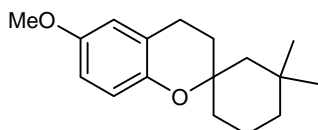

**6-Methoxy-3',3'-dimethylspiro[chroman-2,1'-cyclohexane] (5).** Yellow oil.  $\delta_{\text{H}}$  ( $\text{CDCl}_3$ , 400 MHz): 0.88 (3H, s), 1.06 (3H, s), 1.19 (4H, m), 1.49 (2H, m), 1.70 (2H, m), 1.89 (2H, m), 3.10 (2H, m), 3.76 (3H, s), 6.60 (1H, d,  $J = 2.7$  Hz), 6.68 (1H, dd,  $J = 2.7, 8.9$  Hz), 6.72 (1H, d,  $J = 8.9$  Hz).  $\delta_{\text{C}}$  ( $\text{CDCl}_3$ , 100.6 MHz): 18.3 ( $\text{CH}_2$ ), 22.1 ( $\text{CH}_2$ ), 26.6 ( $\text{CH}_3$ ), 30.7 (C), 33.9 ( $\text{CH}_2$ ), 33.9 ( $\text{CH}_3$ ), 36.0 ( $\text{CH}_2$ ), 39.4 ( $\text{CH}_2$ ), 45.2 ( $\text{CH}_2$ ), 55.7 ( $\text{CH}_3$ ), 74.9 (C), 113.3 (CH), 113.8 (CH), 117.9 (CH), 121.9 (C), 147.7 (C), 152.9 (C).  $\nu_{\text{max}}/\text{cm}^{-1}$ : 2918, 1613, 1493, 1465, 1431, 1364, 1303, 1268, 1227, 1176, 1149, 1042, 963, 906, 842, 801, 718.  $m/z$  (EI) 260 ( $\text{M}^+$ , 100%), 137 (85), 123 (44), 109 (33).

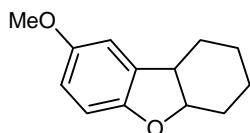

**8-Methoxy-1,2,3,4,9a,9b-hexahydrodibenzo[b,d]furan (6).**<sup>2</sup> Orange oil.  $\delta_{\text{H}}$  ( $\text{CDCl}_3$ , 400 MHz): 1.64 (2H, m), 1.80 (1H, m), 2.01 (2H, m), 2.12 (2H, m), 3.55 (1H, m), 3.76 (3H, s), 5.79 (1H, dd,  $J = 2.1, 10.0$  Hz), 6.04 (1H, m), 6.66 (1H, dd,  $J = 3.0, 8.6$  Hz), 6.70 (1H, d,  $J = 3.0$  Hz), 6.73 (1H, d,  $J = 8.6$  Hz).  $\delta_{\text{C}}$  ( $\text{CDCl}_3$ , 100.6 MHz): 20.7 ( $\text{CH}_2$ ), 22.2 ( $\text{CH}_2$ ), 27.6 ( $\text{CH}_2$ ), 28.3 ( $\text{CH}_2$ ), 41.1 (CH), 56.0 ( $\text{CH}_3$ ), 82.7 (CH), 109.8 (CH), 110.3 (CH), 112.1 (CH), 134.6 (C), 153.4 (C), 154.1 (C).  $\nu_{\text{max}}/\text{cm}^{-1}$ : 2933, 2857, 1736, 1602, 1483, 1449, 1433, 1373, 1266, 1214, 1177, 1134, 1087, 1031, 950, 885, 855, 813, 746.  $m/z$  (EI) 204 ( $\text{M}^+$ , 100%), 161 (42), 150 (74), 137 (25).

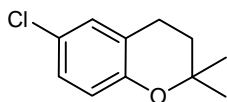

**6-Chloro-2,2-dimethylchroman (7).**<sup>1</sup> Yellow oil.  $\delta_{\text{H}}$  (CDCl<sub>3</sub>, 400 MHz): 1.32 (6H, s), 1.78 (2H, t,  $J = 6.8$  Hz), 2.74 (2H, t,  $J = 6.8$  Hz), 6.7 (1H, d,  $J = 9.2$  Hz), 7.04 (2H, m).  $\delta_{\text{C}}$  (CDCl<sub>3</sub>, 100.6 MHz): 22.4 (CH<sub>2</sub>), 26.8 (2 x CH<sub>3</sub>), 32.4 (CH<sub>2</sub>), 74.5 (C), 118.6 (CH), 122.5 (C), 124.2 (C), 127.2 (CH), 129.0 (CH), 152.6 (C).  $\nu_{\text{max}}/\text{cm}^{-1}$ : 2976, 2931, 1717, 1477, 1452, 1417, 1385, 1370, 1295, 1262, 1182, 1158, 1123, 1085, 946, 887, 814, 773, 683.  $m/z$  (EI) 196 (M<sup>+</sup>, 82%), 181 (55), 161 (40), 143 (46), 141 (100), 77 (33).

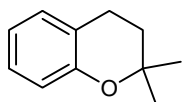

**2,2-Dimethylchroman (8).**<sup>1</sup> Yellow oil.  $\delta_{\text{H}}$  (CDCl<sub>3</sub>, 400 MHz): 1.37 (6H, s), 1.84 (2H, t,  $J = 6.8$  Hz), 2.81 (2H, t,  $J = 6.8$  Hz), 6.82 (1H, d,  $J = 8.1$  Hz), 6.85 (1H, t,  $J = 7.3$  Hz), 7.10 (2H, m).  $\delta_{\text{C}}$  (CDCl<sub>3</sub>, 100.6 MHz): 22.5 (CH<sub>2</sub>), 26.9 (2 x CH<sub>3</sub>), 32.8 (CH<sub>2</sub>), 74.1 (C), 117.3 (CH), 119.6 (CH), 120.9 (C), 127.3 (CH), 129.5 (CH), 154.0 (C).  $\nu_{\text{max}}/\text{cm}^{-1}$ : 2975, 2932, 2852, 1716, 1610, 1582, 1489, 1456, 1383, 1368, 1347, 1306, 1256, 1220, 1157, 1123, 1037, 948, 931, 884, 833, 709.  $m/z$  (EI) 162 (M<sup>+</sup>, 53%), 147 (50), 107 (100).

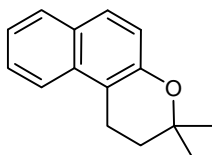

**3,3-Dimethyl-2,3-dihydro-1H-benzo[f]chromene (9).**<sup>3</sup> Pale yellow solid. m.p. 108-109 °C (lit.<sup>3</sup> 110 °C).  $\delta_{\text{H}}$  (CDCl<sub>3</sub>, 400 MHz): 1.59 (6H, s), 2.09 (2H, t,  $J = 6.8$  Hz), 3.17 (2H, t,  $J = 6.8$  Hz), 7.31 (1H, d,  $J = 8.8$  Hz), 7.55 (1H, t,  $J = 8.0$  Hz), 7.70 (1H, t,  $J = 8.0$  Hz), 7.83 (1H, d,  $J = 8.8$  Hz), 7.96 (1H, d,  $J = 8.0$  Hz), 8.01 (1H, d,  $J = 8.0$  Hz).  $\delta_{\text{C}}$  (CDCl<sub>3</sub>, 100.6 MHz): 19.3 (CH<sub>2</sub>), 26.5 (2 x CH<sub>3</sub>), 32.7 (CH<sub>2</sub>), 74.0 (C), 111.4 (C), 119.8 (CH), 121.9 (CH), 122.9 (CH), 126.2 (CH), 127.7 (CH), 128.4 (CH), 128.7 (C), 133.1 (C), 151.4 (C).  $\nu_{\text{max}}/\text{cm}^{-1}$ : 3049, 2975, 2927, 2853, 1760, 1619, 1597, 1509, 1466, 1433, 1395, 1367, 1318, 1236, 1158, 1121, 1079, 971, 895, 814, 749, 684.  $m/z$  (EI) 212 (M<sup>+</sup>, 67%), 157 (100), 128 (39).

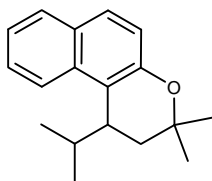

**1-Isopropyl-3,3-dimethyl-2,3-dihydro-1H-benzo[f]chromene (10):** Pale-yellow solid. mp 70-72 °C.  $\delta_{\text{H}}$  (CDCl<sub>3</sub>, 400 MHz): 0.62 (3H, d,  $J = 6.8$  Hz), 1.21 (3H, d,  $J = 6.9$  Hz), 1.29 (3H, s), 1.66 (3H, s), 2.06 (1H, dd,  $J = 8.9, 13.9$  Hz), 2.15 (1H, dd,  $J = 8.9, 13.9$  Hz), 2.81 (1H, m), 3.62 (1H, dt,  $J = 4.2, 8.9$  Hz), 7.20 (1H, d,  $J = 8.8$  Hz), 7.44 (1H, t,  $J = 8.0$  Hz), 7.57 (1H, t,  $J = 8.0$  Hz), 7.72 (1H, d,  $J = 8.0$  Hz), 7.89 (1H, d,  $J = 8.0$  Hz), 8.01 (1H, d,  $J = 8.4$  Hz).  $\delta_{\text{C}}$  (CDCl<sub>3</sub>, 100.6 MHz): 15.7 (CH<sub>3</sub>), 21.2 (CH<sub>3</sub>), 23.6 (CH<sub>3</sub>), 30.4 (CH<sub>3</sub>), 30.8 (CH), 35.0 (CH), 35.3 (CH<sub>2</sub>), 74.8 (C), 119.3 (C), 120.1 (CH), 122.9 (CH), 123.6 (CH), 125.5 (CH), 127.8 (CH), 128.9 (CH), 130.0 (C), 132.4 (C), 152.7 (C).  $\nu_{\text{max}}/\text{cm}^{-1}$ : 3062, 2967, 2931, 2869, 1620, 1598, 1512, 1461, 1390, 1368, 1313, 1268, 1242, 1199, 1138, 1075, 1019, 985, 942, 903, 813, 748, 709, 665.  $m/z$  (EI) 254 (M<sup>+</sup>, 33%), 211 (100), 181 (25), 169 (31).

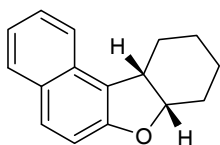

**(7aS,11aS)-7a,8,9,10,11,11a-Hexahydrobenzo[d]naphtho[2,1-b]furan (11):**<sup>4</sup> Pale yellow oil.  $\delta_{\text{H}}$  ( $\text{CDCl}_3$ , 400 MHz): 1.27 (1H, m), 1.34 (1H, m), 1.61 (1H, m), 1.71 (2H, m), 1.88 (1H, m), 2.21 (1H, m), 2.39 (1H, m), 3.46 (1H, dt,  $J = 6.5, 10.5$  Hz), 4.81 (1H, m), 7.18 (1H, d,  $J = 8.8$  Hz), 7.31 (1H, t,  $J = 8.0$  Hz), 7.47 (1H, t,  $J = 8.0$  Hz), 7.68-7.71 (2H, m), 7.83 (1H, d,  $J = 8.8$  Hz).  $\delta_{\text{C}}$  ( $\text{CDCl}_3$ , 100.6 MHz): 20.4 ( $\text{CH}_2$ ), 22.6 ( $\text{CH}_2$ ), 27.4 ( $\text{CH}_2$ ), 29.1 ( $\text{CH}_2$ ), 39.8 (CH), 83.5 (CH), 112.6 (CH), 122.7 (2C) (CH), 126.4 (CH), 126.8 (C), 128.5 (CH), 128.9 (CH), 129.5 (C), 130.3 (C), 156.7 (C).  $\nu_{\text{max}}/\text{cm}^{-1}$ : 3056, 3023, 2934, 2859, 1629, 1593, 1520, 1462, 1445, 1374, 1353, 1248, 1218, 1203, 1162, 1098, 1068, 974, 940, 883, 855, 814, 776, 746.  $m/z$  (EI) 224 ( $\text{M}^+$ , 95%), 181 (100), 152 (20).

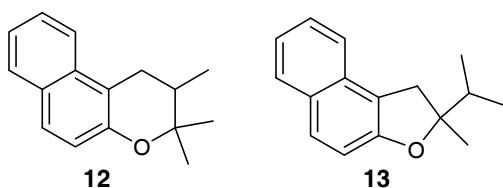

**2,3,3-Trimethyl-2,3-dihydro-1H-benzo[f]chromene (12) and 2-isopropyl-2-methyl-1,2-dihydronaphtho[2,1-b]furan (13).** Obtained as an inseparable mixture of isomers in a ratio of 40:60, as a yellow-orange oil.

Observable signals attributed to the major isomer (**13**):  $\delta_{\text{H}}$  ( $\text{CDCl}_3$ , 400 MHz): 1.08 (3H, d,  $J = 6.8$  Hz), 1.14 (3H, d,  $J = 6.8$  Hz), 1.52 (3H, s), 2.15 (1H, m), 3.14 (1H, d,  $J = 15.5$  Hz), 3.45 (1H, d,  $J = 15.5$  Hz), 7.18 (1H, d,  $J = 8.7$  Hz), 7.36 (1H, t,  $J = 8.0$  Hz), 7.54 (1H, t,  $J = 8.2$  Hz), 7.65 (1H, d,  $J = 8.0$  Hz), 7.74 (1H, d,  $J = 8.7$  Hz), 7.87 (1H, d,  $J = 7.8$  Hz).  $\delta_{\text{C}}$  ( $\text{CDCl}_3$ , 100.6 MHz): 17.5 (2 x  $\text{CH}_3$ ), 24.1 ( $\text{CH}_3$ ), 37.3 (CH), 37.6 ( $\text{CH}_2$ ), 92.8 (C), 112.4 (CH), 119.6 (CH), 122.6 (CH), 122.7 (CH), 126.6 (CH), 127.8 (CH), 128.8 (C), 129.0 (C), 131.2 (C), 156.6 (C).

Observable signals attributed to the minor isomer (**12**):  $\delta_{\text{H}}$  ( $\text{CDCl}_3$ , 400 MHz): 1.19 (3H, d,  $J = 6.9$  Hz), 1.28 (3H, s), 1.53 (3H, s), 2.13 (1H, m), 2.70 (1H, dd,  $J = 10.0, 16.8$  Hz), 3.16 (1H, dd,  $J = 5.7, 16.8$  Hz), 7.14 (1H, d,  $J = 8.9$  Hz), 7.41 (1H, t,  $J = 8.0$  Hz), 7.56 (1H, t,  $J = 8.4$  Hz), 7.69 (1H, d,  $J = 8.9$  Hz), 7.83 (1H, d,  $J = 8.0$  Hz), 7.89 (1H, d,  $J = 8.0$  Hz).  $\delta_{\text{C}}$  ( $\text{CDCl}_3$ , 100.6 MHz): 17.0 ( $\text{CH}_3$ ), 19.8 ( $\text{CH}_3$ ), 27.4 ( $\text{CH}_3$ ), 28.2 ( $\text{CH}_2$ ), 35.6 (CH), 77.6 (C), 118.2 (C), 119.6 (CH), 122.0 (CH), 122.6 (CH), 123.0 (CH), 126.3 (CH), 128.5 (CH), 131.1 (C), 133.0 (C), 151.1 (C).  $\nu_{\text{max}}/\text{cm}^{-1}$ : 3058, 2963, 2872, 1715, 1629, 1597, 1520, 1464, 1372, 1249, 1169, 1076, 978, 924, 811, 747.  $m/z$  (EI) 226 ( $\text{M}^+$ , 90%), 183 (80), 157 (100), 129 (31).

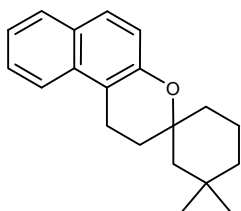

**3',3'-Dimethyl-3,4-dihydrospiro[benzo[g]chromene-2,1'-cyclohexane] (14):** Pale yellow oil.  $\delta_{\text{H}}$  ( $\text{CDCl}_3$ , 400 MHz): 0.98 (3H, s), 1.18 (3H, s), 1.34 (4H, m), 1.59 (2H, m), 1.86 (2H, m), 1.95 (2H, m), 3.10 (2H, m), 7.15 (1H, d,  $J = 8.8$  Hz), 7.42 (1H, t,  $J = 8.0$  Hz), 7.57 (1H, t,  $J = 8.0$  Hz), 7.71 (1H, d,  $J = 8.8$  Hz), 7.85 (1H, d,  $J = 8.8$  Hz), 7.90 (1H, d,  $J = 8.0$  Hz).  $\delta_{\text{C}}$  ( $\text{CDCl}_3$ , 100.6 MHz): 17.2 (C), 18.4 ( $\text{CH}_2$ ), 18.8 ( $\text{CH}_2$ ), 26.7 ( $\text{CH}_3$ ), 30.8 (C), 33.8 ( $\text{CH}_2$ ), 34.1 ( $\text{CH}_3$ ), 35.9 ( $\text{CH}_2$ ), 39.5 ( $\text{CH}_2$ ), 45.0

(CH<sub>2</sub>), 75.3 (C), 112.9 (C), 120.1 (CH), 121.9 (CH), 123.0 (CH), 126.2 (CH), 127.8 (CH), 128.5 (CH), 133.2 (C), 151.2 (C).  $\nu_{\max}/\text{cm}^{-1}$  : 3060, 2945, 2867, 1623, 1599, 1514, 1466, 1435, 1397, 1364, 1263, 1237, 1176, 1099, 1056, 981, 883, 811, 745, 685.  $m/z$  (EI) 280 (M<sup>+</sup>, 73%), 195 (18), 157 (100).

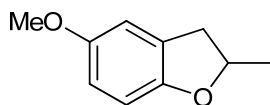

**5-Methoxy-2-methyl-2,3-dihydrobenzofuran (18b):**<sup>5</sup> Yellow oil.  $\delta_{\text{H}}$  (CDCl<sub>3</sub>, 400 MHz): 1.45 (3H, d,  $J = 6.3$  Hz), 2.79 (1H, dd,  $J = 7.8, 15.5$  Hz), 3.27 (1H, dd,  $J = 8.7, 15.5$  Hz), 3.75 (3H, s), 4.90 (1H, m), 6.65 (2H, m), 6.75 (1H, s).

---

## References

1. Youn, S. W.; Eom, J. I. *J. Org. Chem.* **2006**, *71*, 6705.
2. Core, S. K.; Lotspeich, F. J. *J. Org. Chem.* **1971**, *36*, 399.
3. Paradkar, M. V.; Godbole, H. M.; Ranade, A. A.; Joseph, A. R. *J. Chem. Res. Synop.* **1998**, 318.
4. Kovacs, P.; Kolonits, P.; Kaleta, Z.; Parkanyi, L.; Szabo, E.; Novak, L. *Synthesis* **2003**, 1043.
5. Grant, V. H.; Liu, B. *Tetrahedron Lett.* **2005**, *46*, 1237.

6.722  
6.709  
6.702  
6.632  
6.625

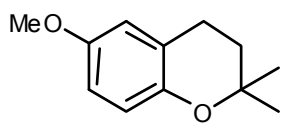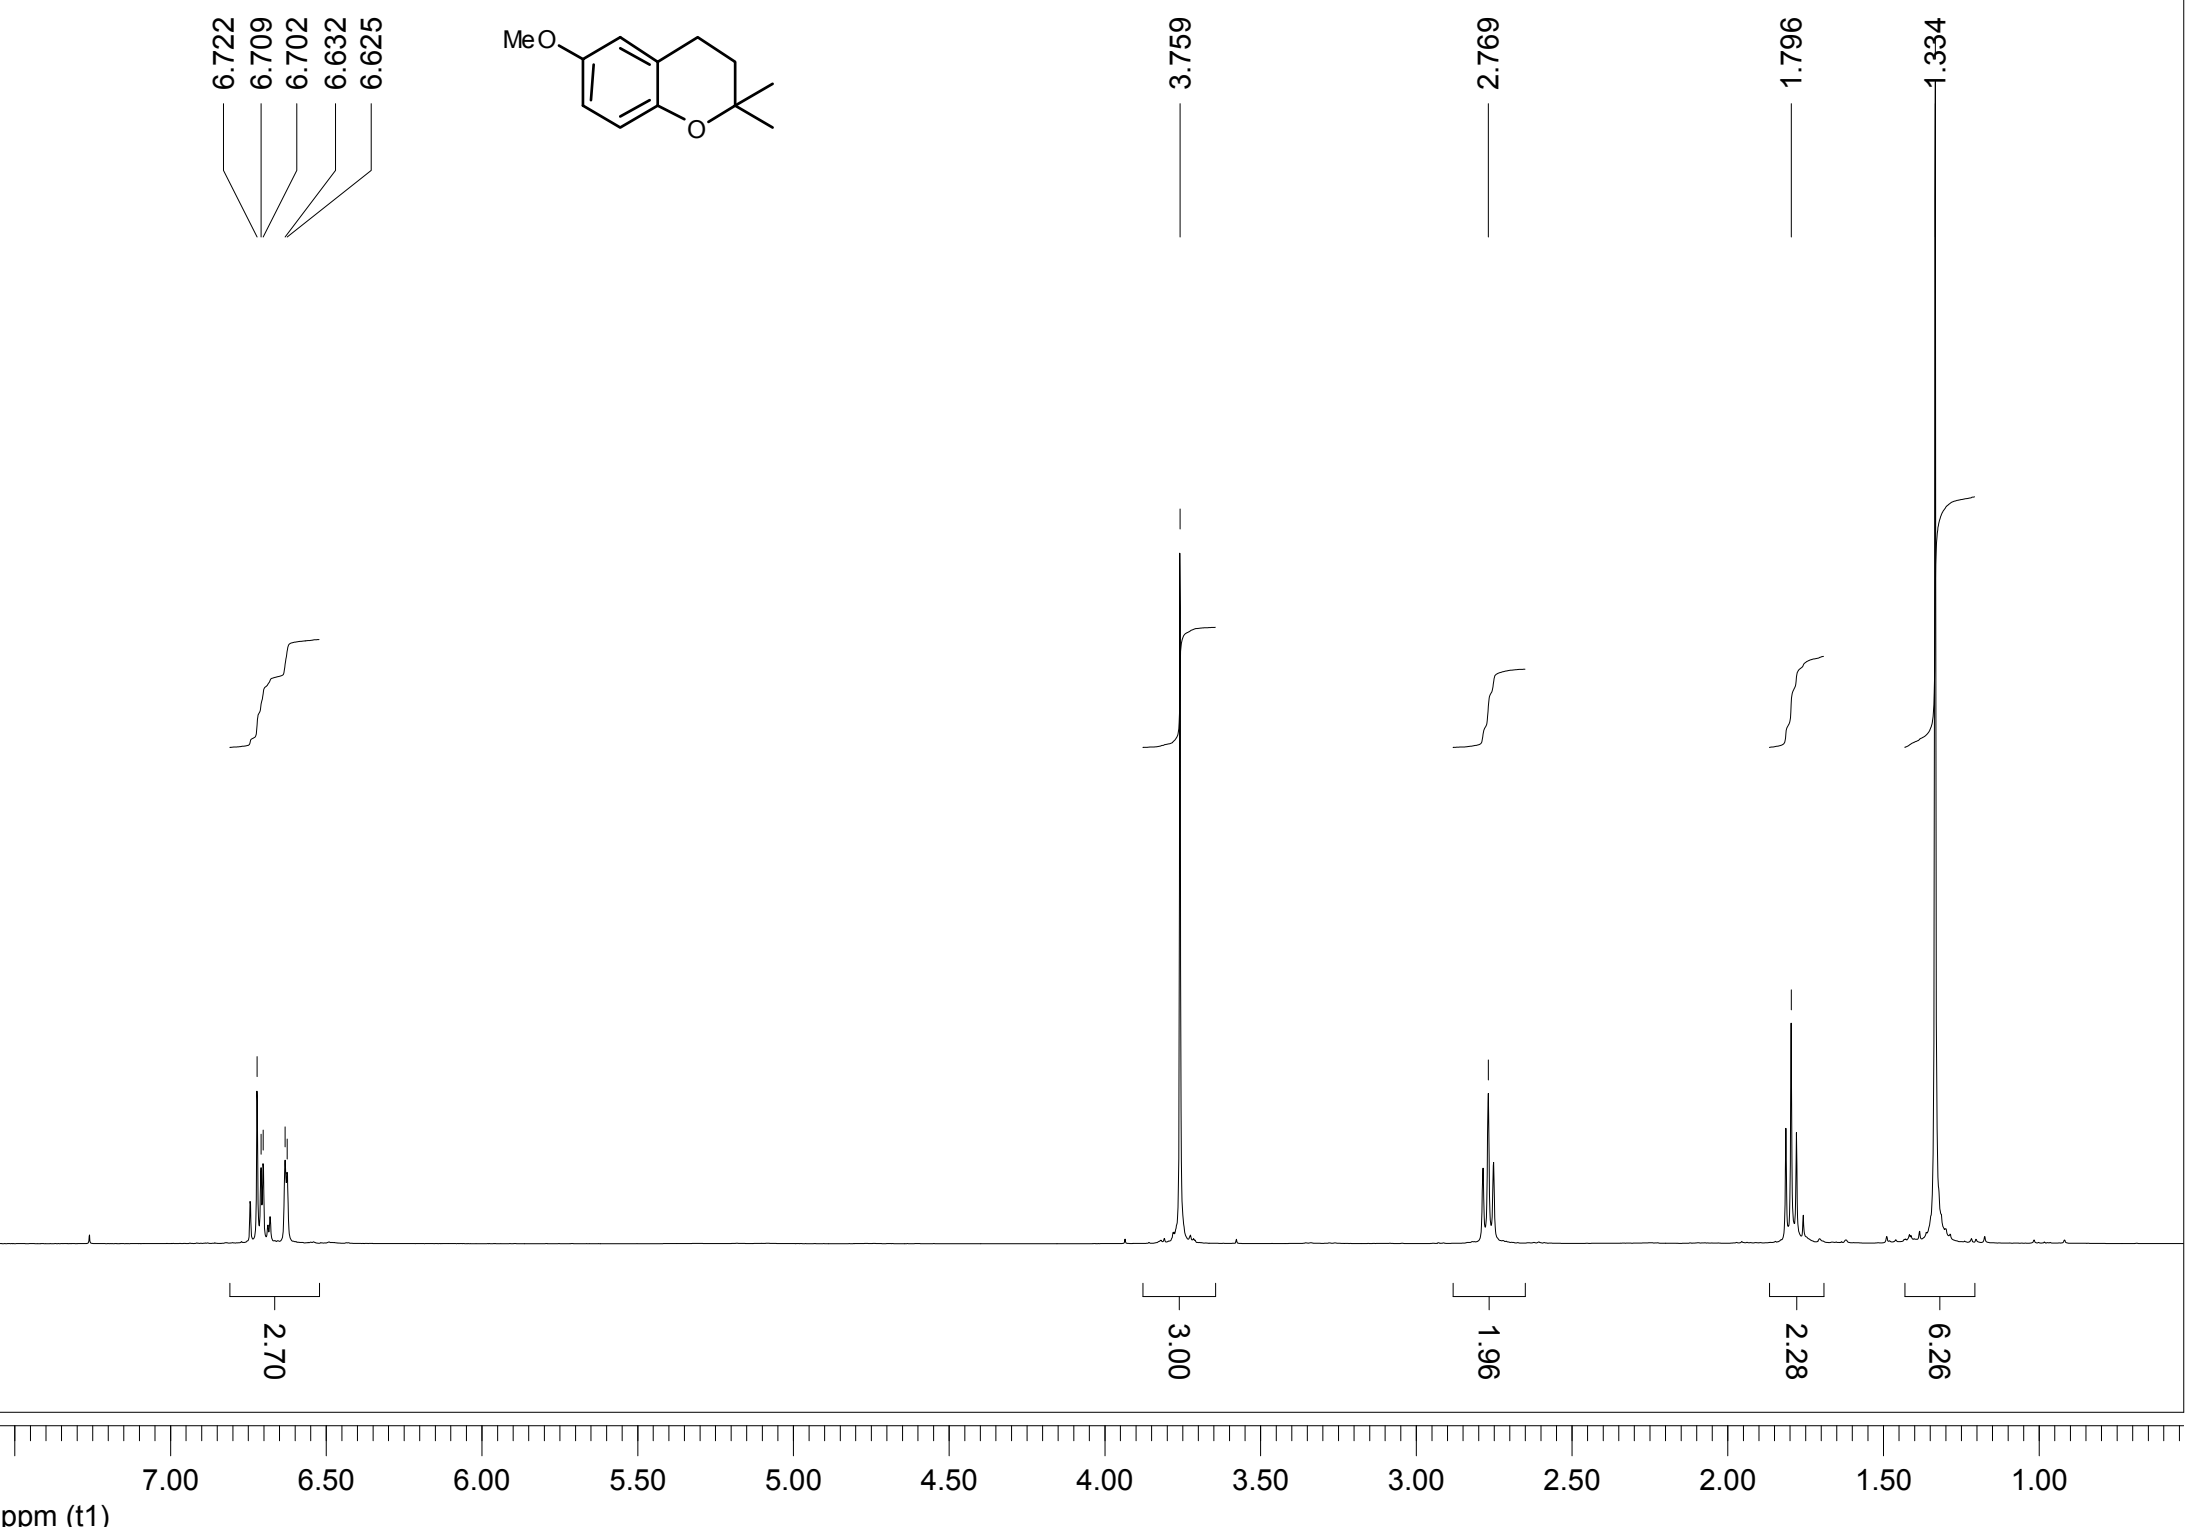

152.879  
147.967

121.466  
117.734  
113.949  
113.390

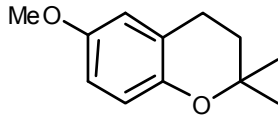

73.791

55.721

32.824

26.764

22.824

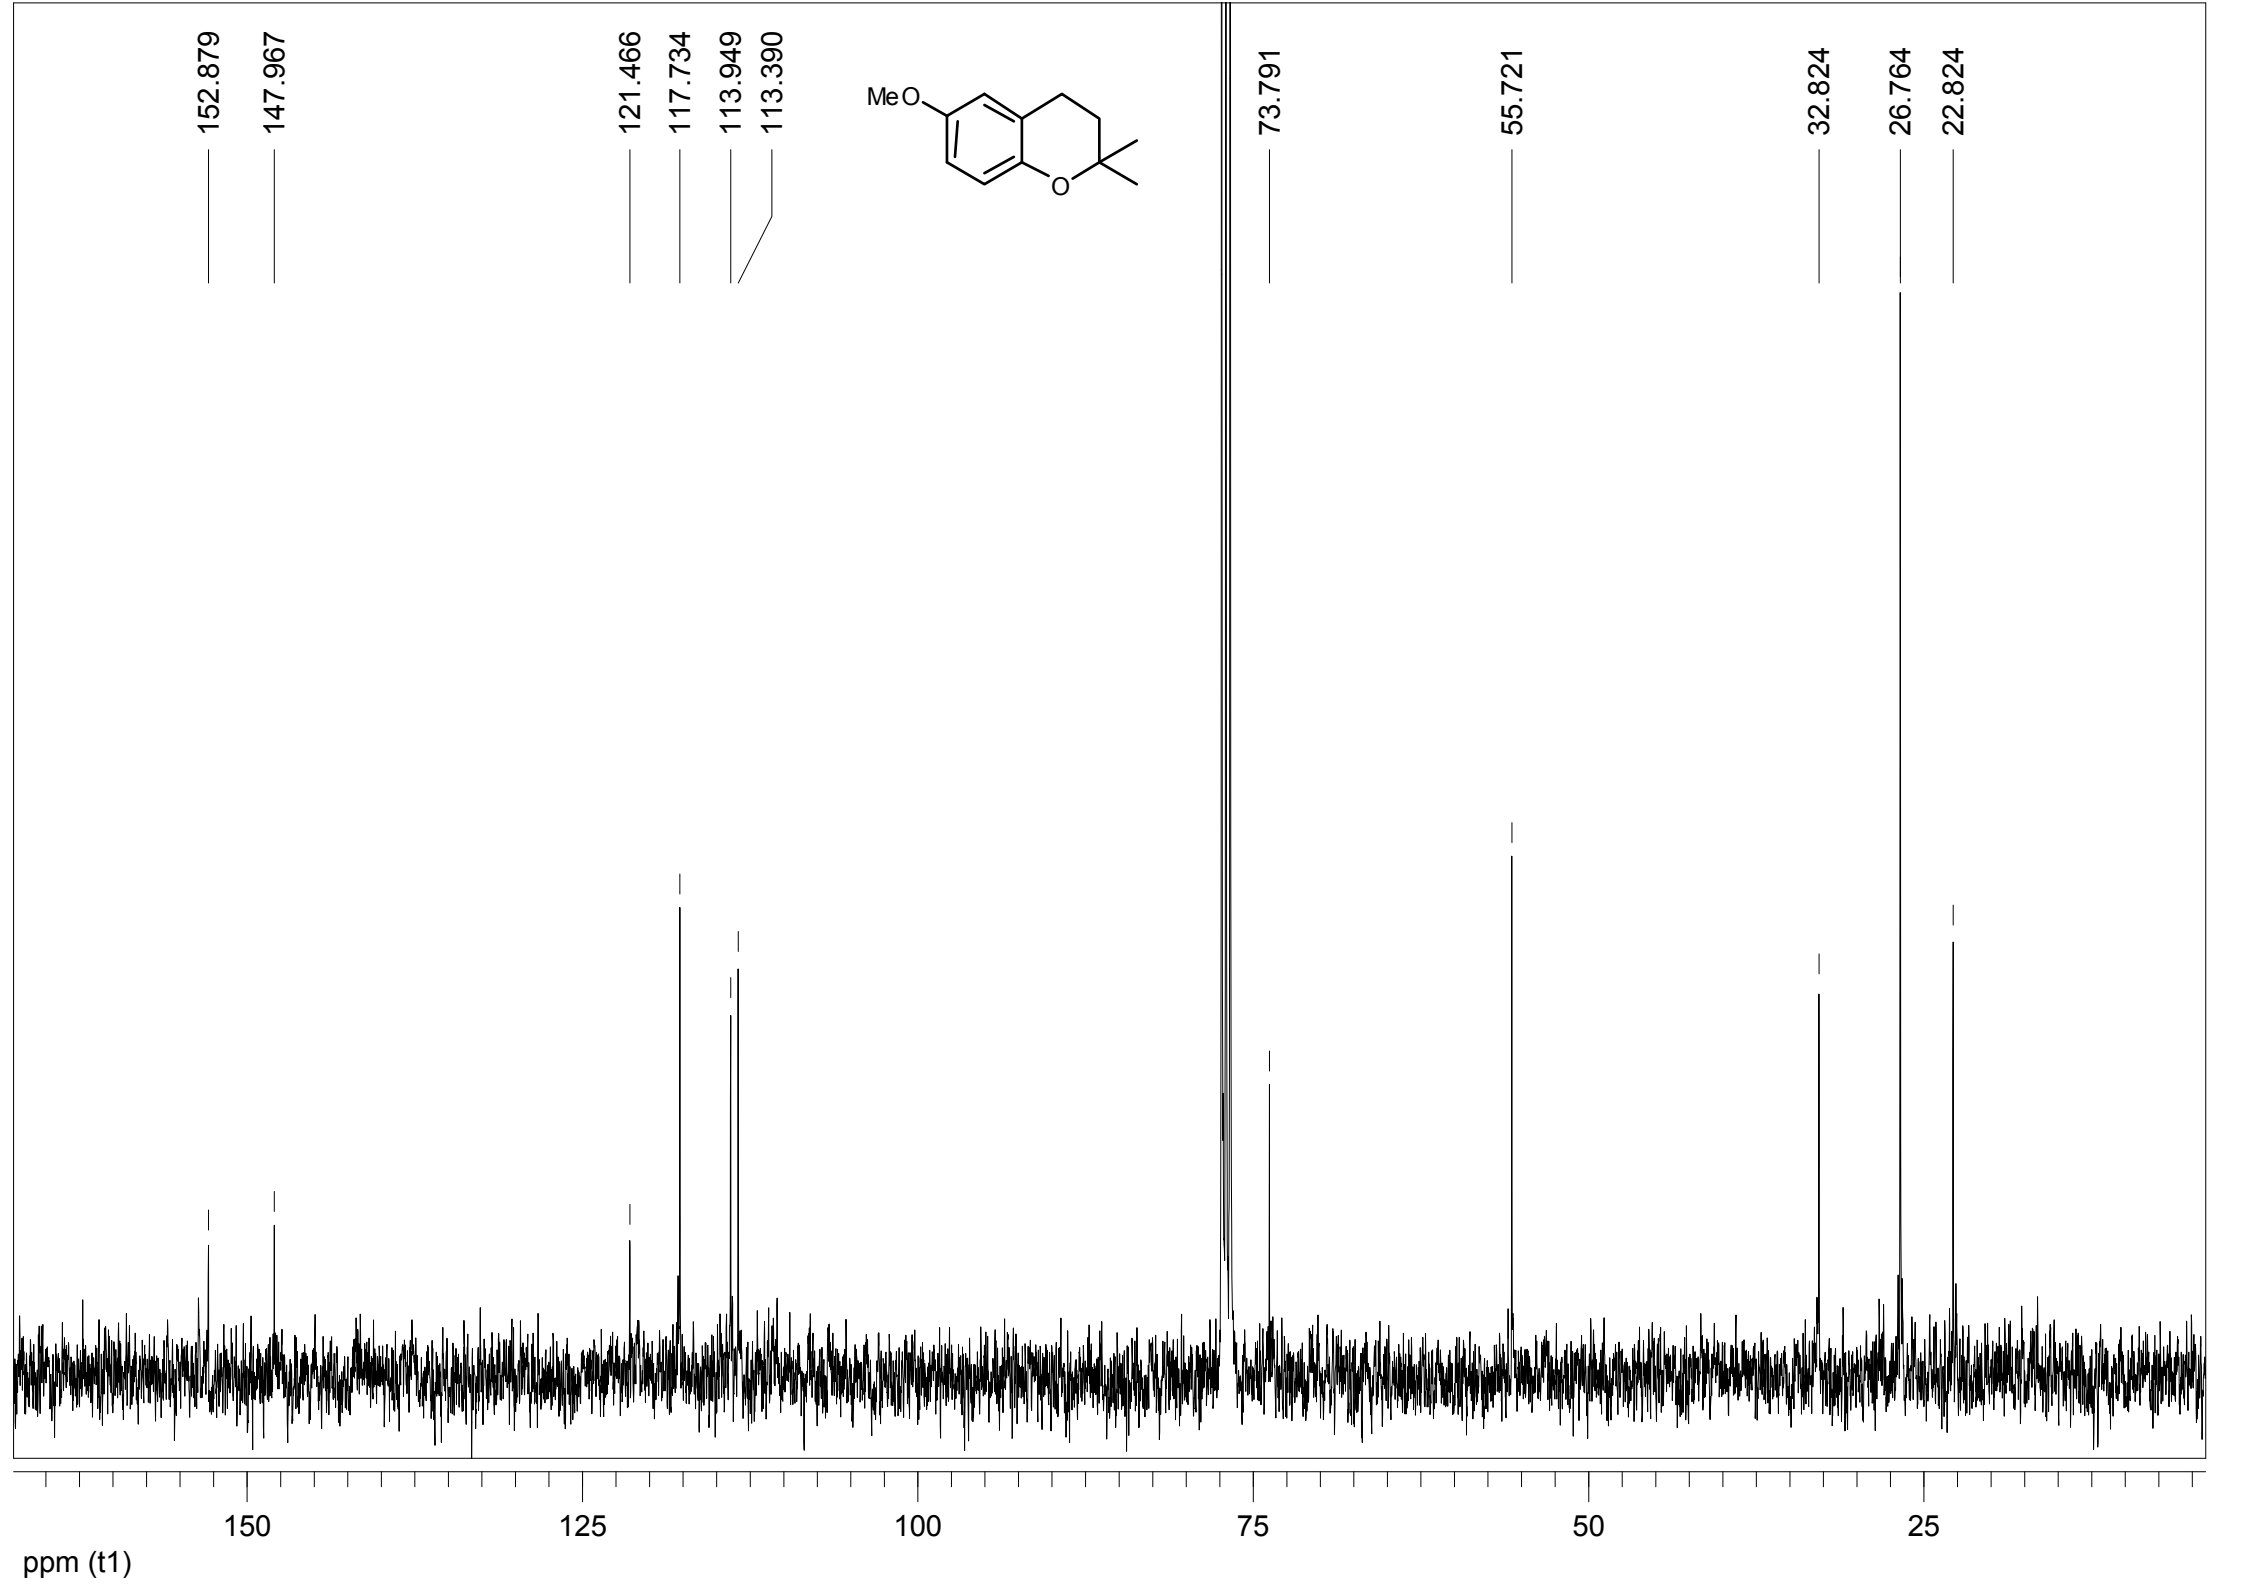

ppm (t1)

150

125

100

75

50

25

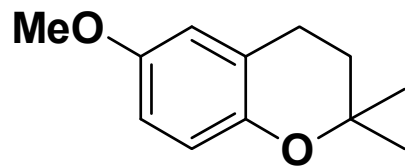

117.734  
113.950  
113.388

55.722

32.816

26.765

22.822

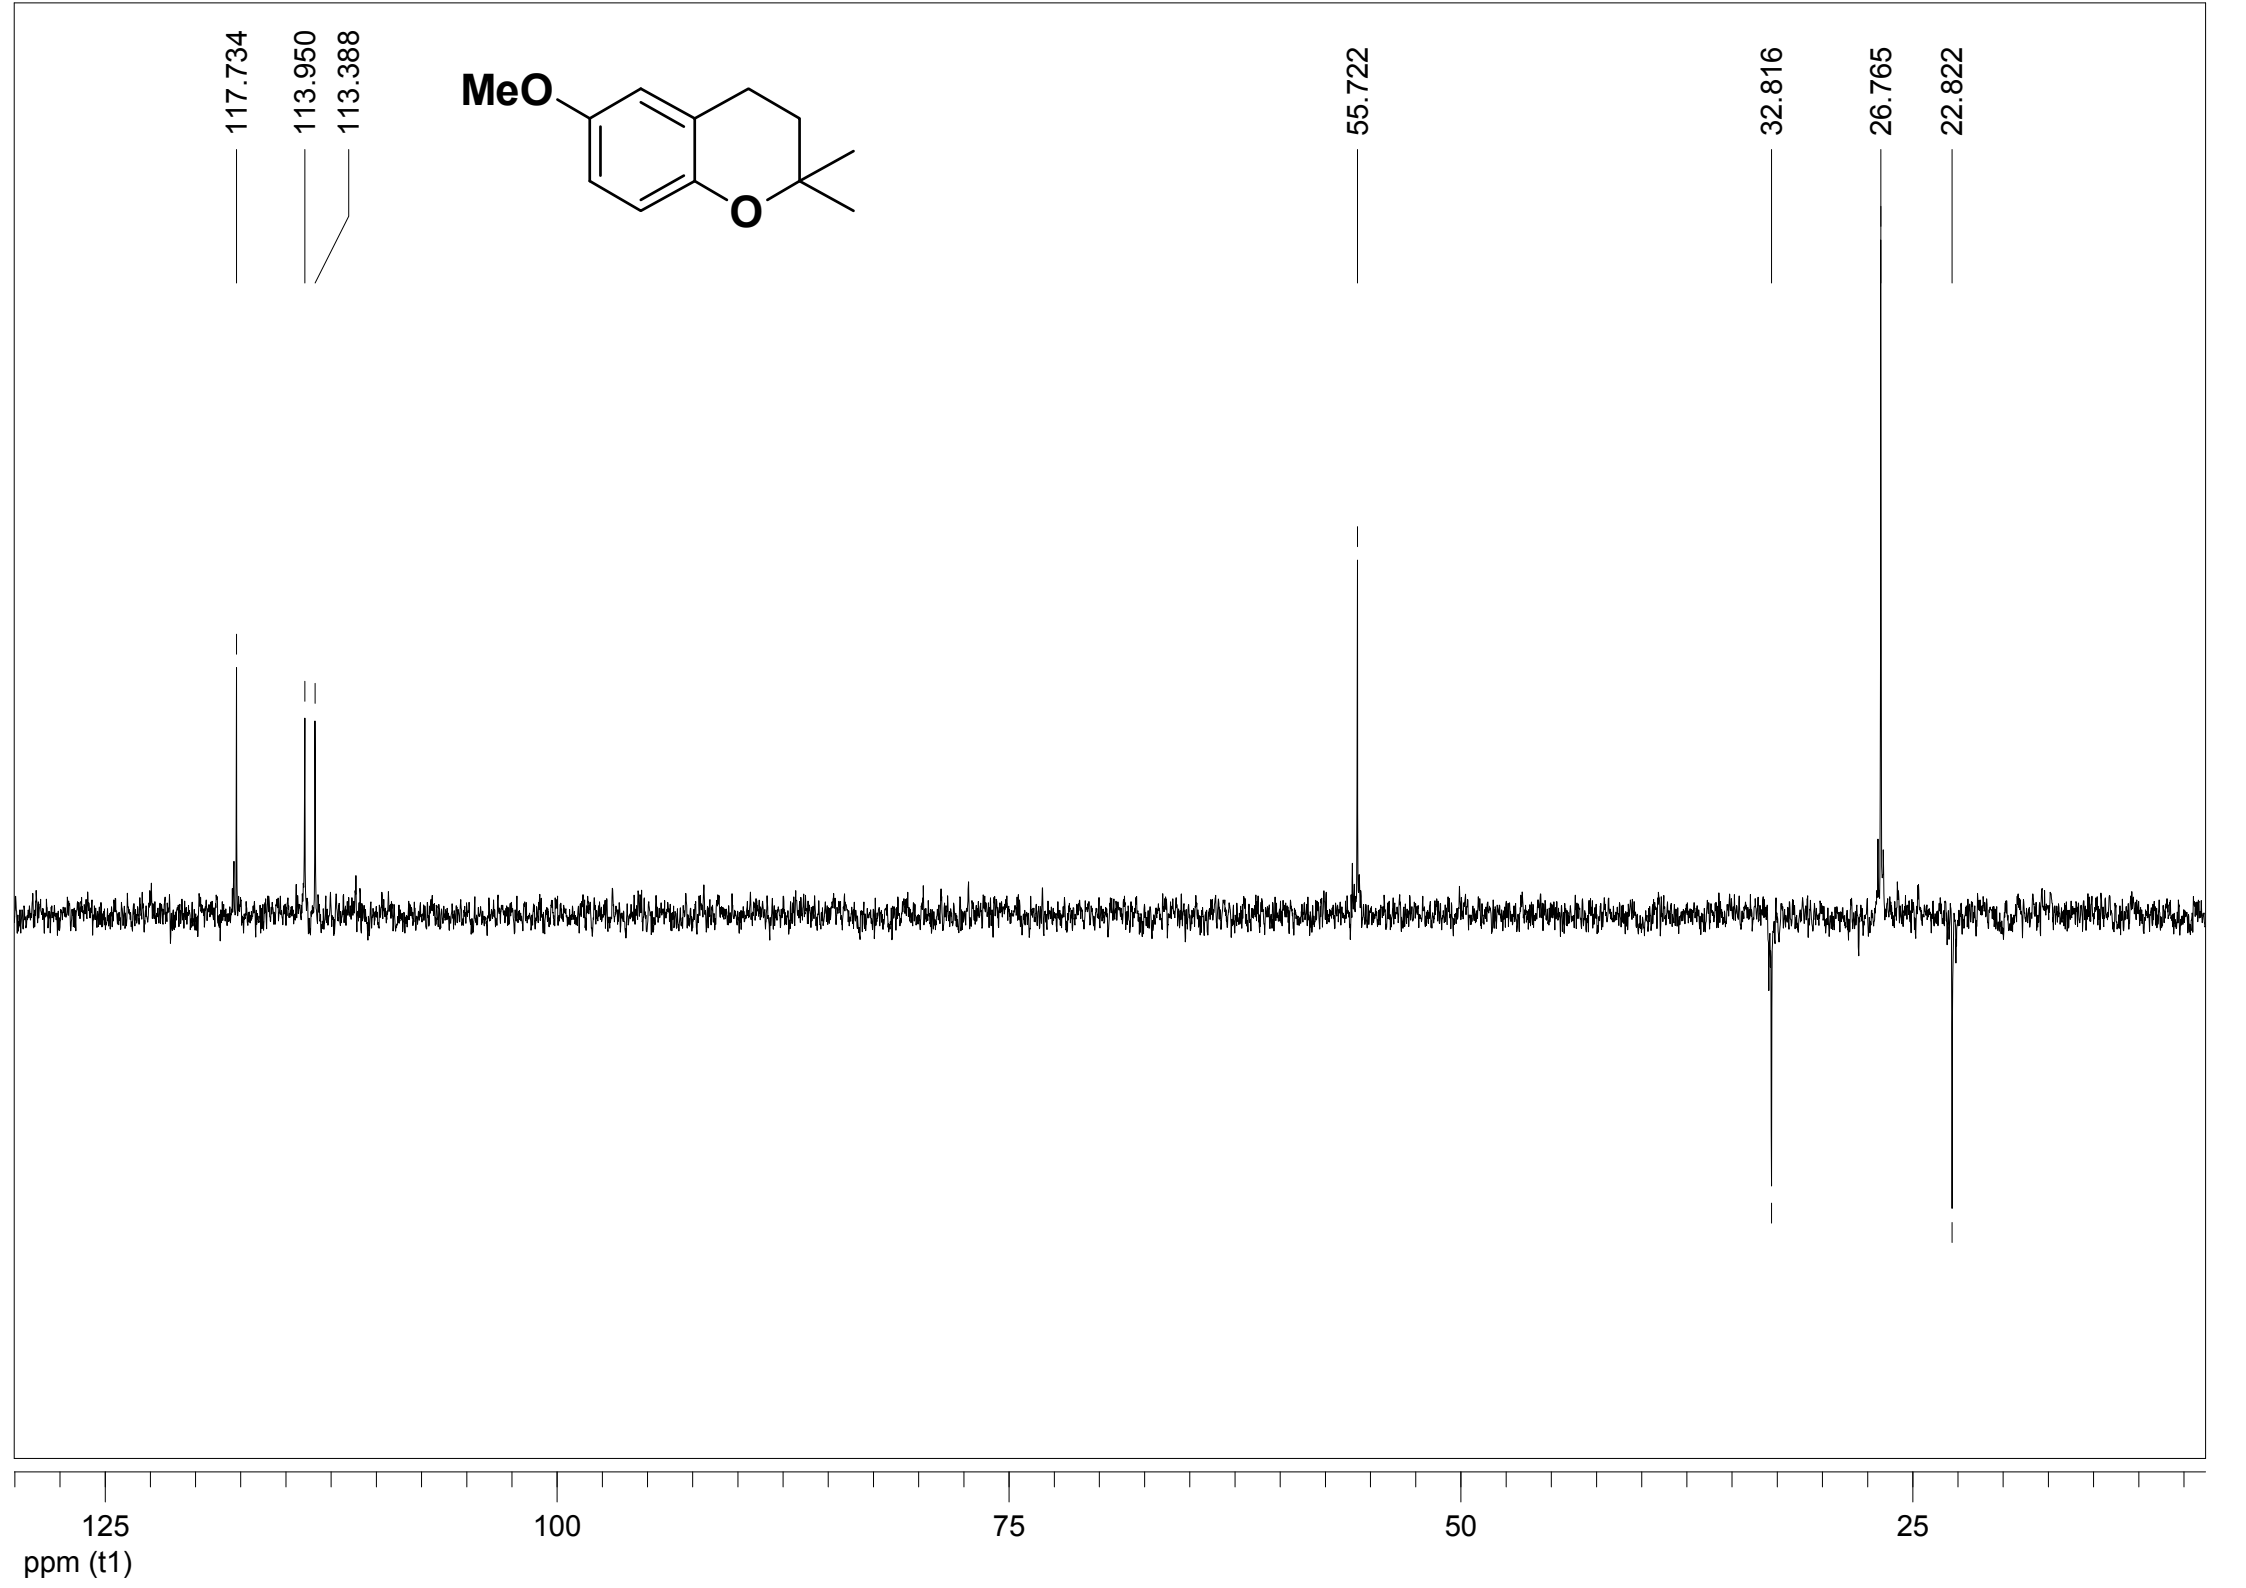



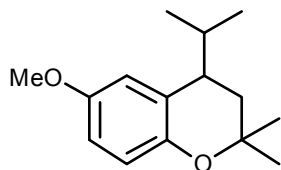

6.795  
6.710

3.756

2.863

2.491  
2.481

1.651  
1.634  
1.433

1.192  
1.077  
1.060

0.701  
0.684

2.92

3.00

0.98

0.96

2.15

3.05

3.00

3.10

3.01

7.50 7.00 6.50 6.00 5.50 5.00 4.50 4.00 3.50 3.00 2.50 2.00 1.50 1.00 0.50  
ppm (t1)

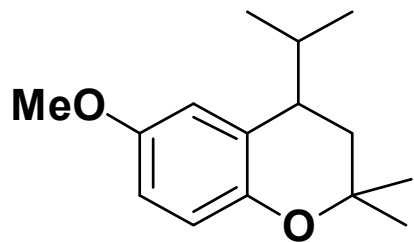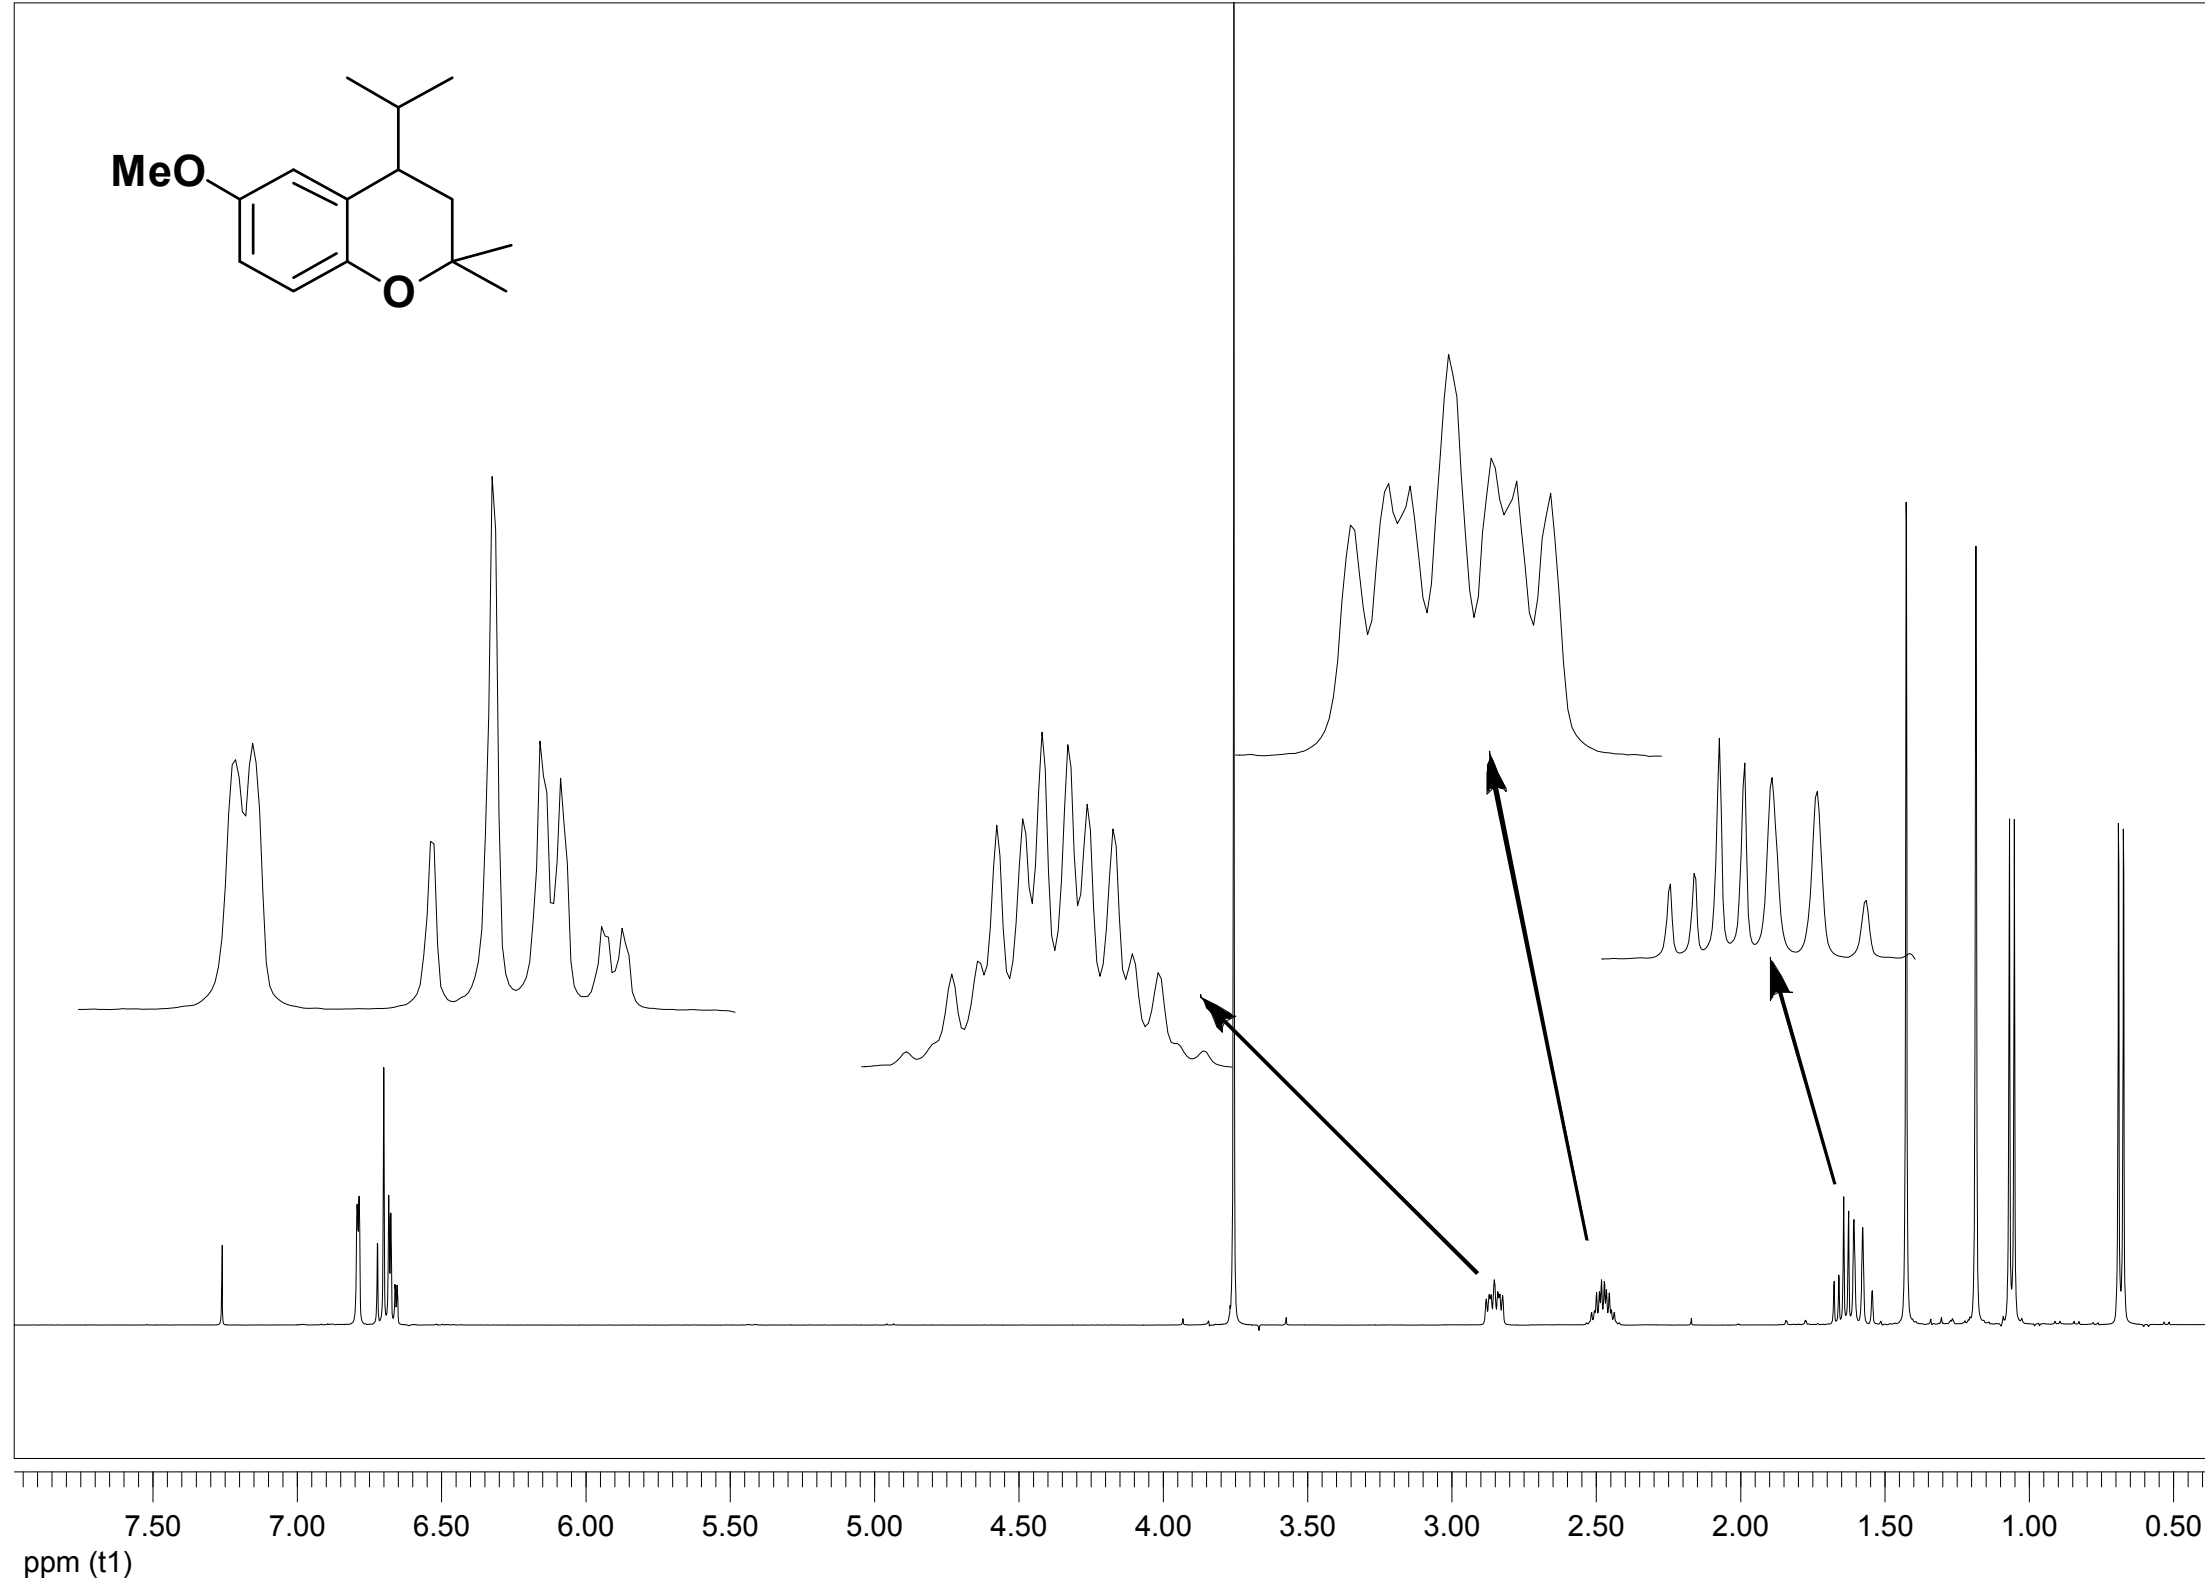

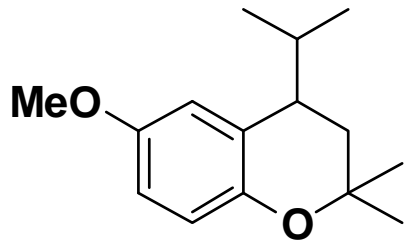

153.268  
148.532  
125.487  
117.856  
112.565  
112.257  
73.876  
55.702  
36.892  
32.436  
30.463  
29.349  
23.698  
20.685  
15.591

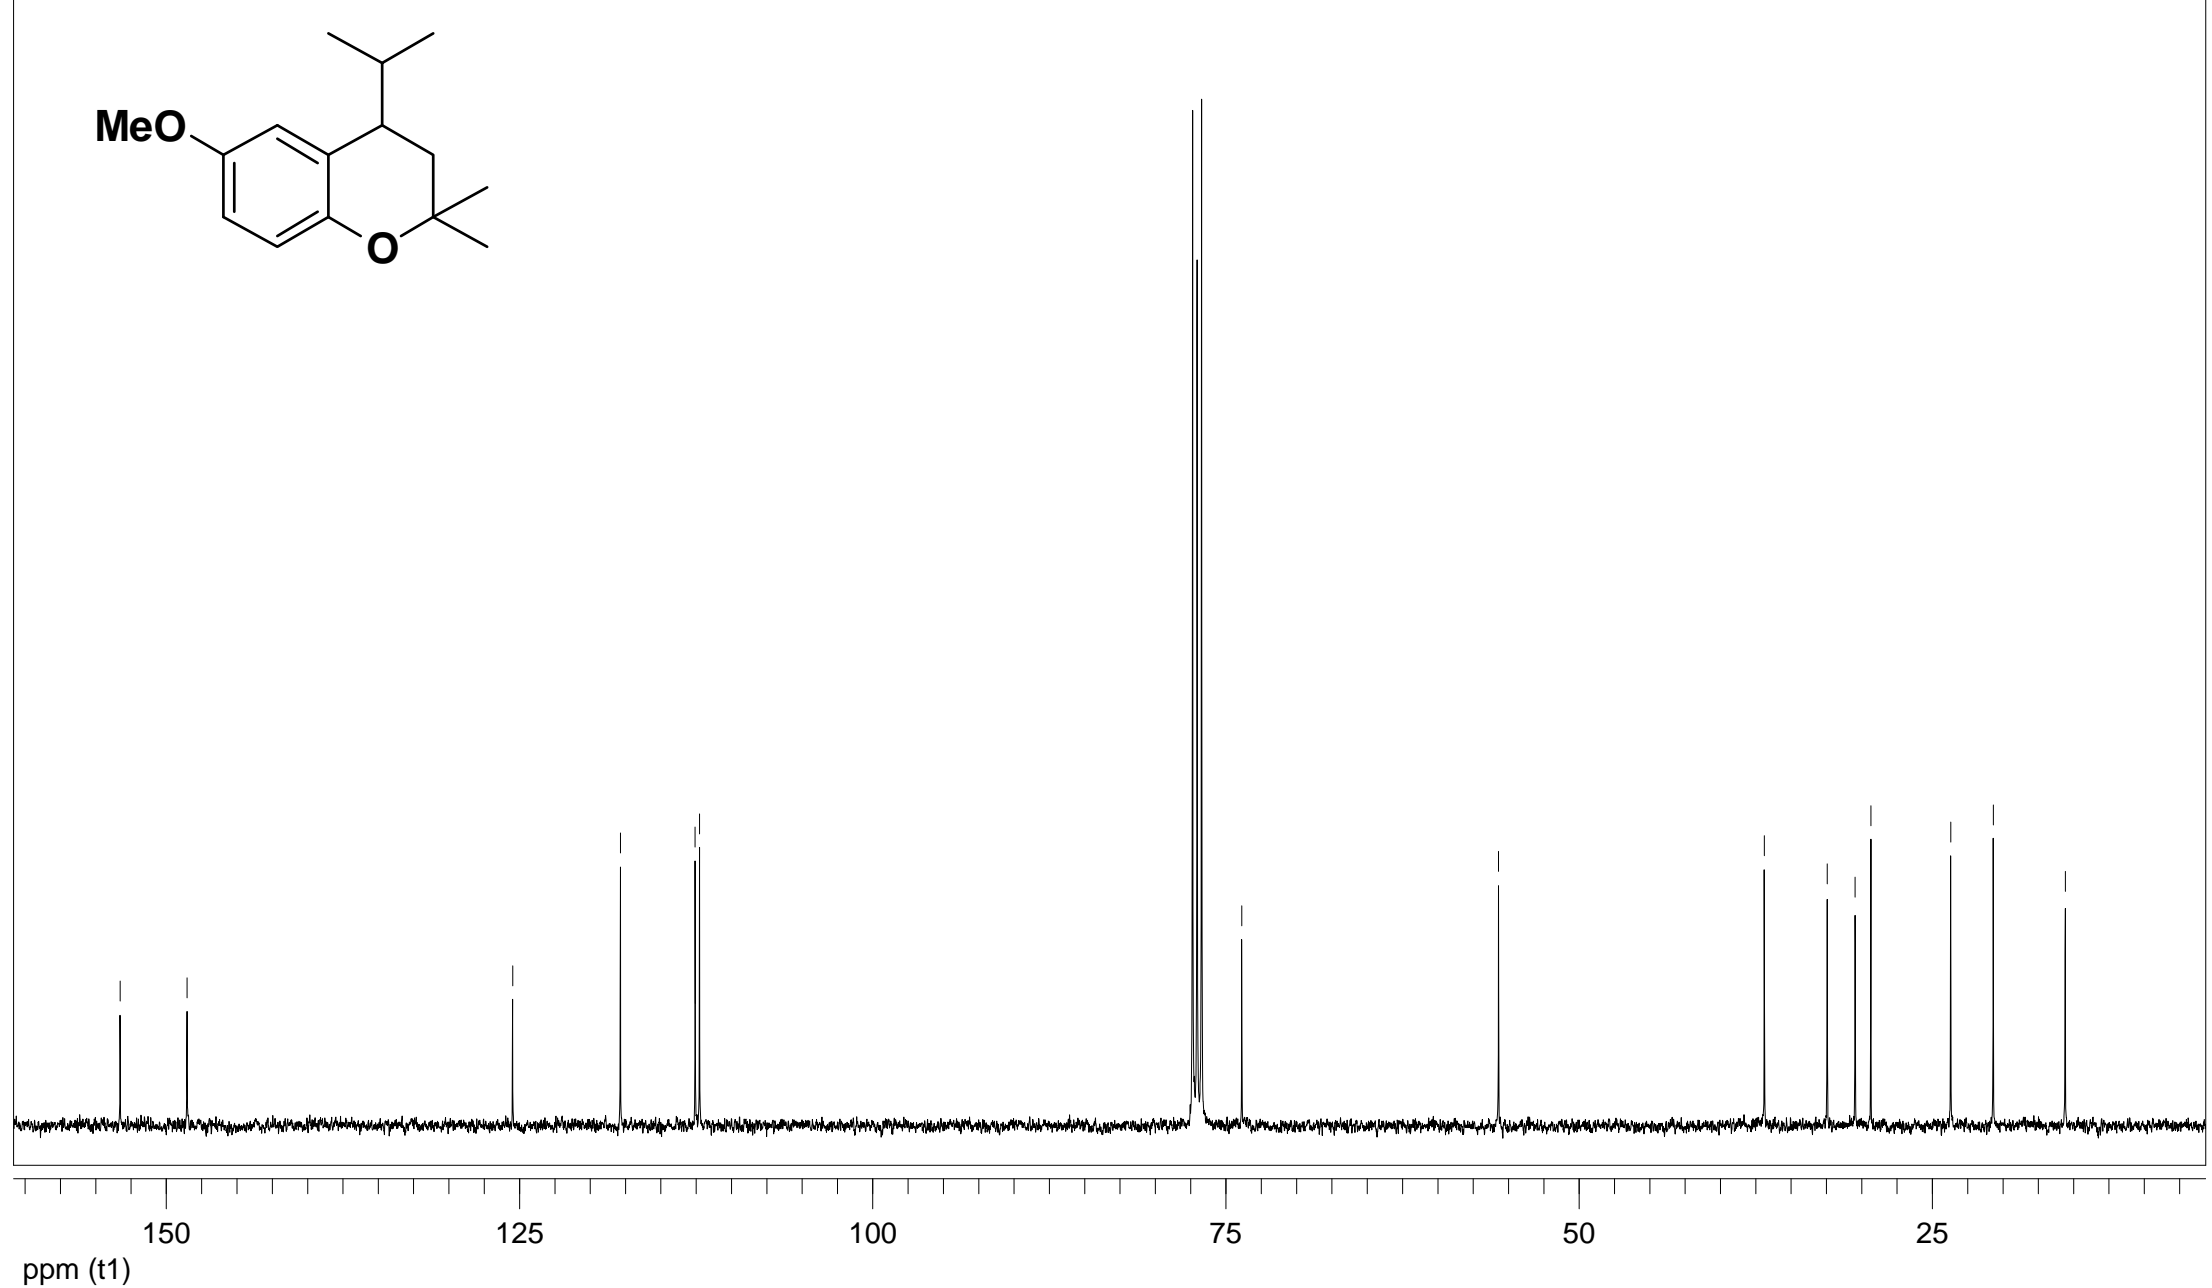

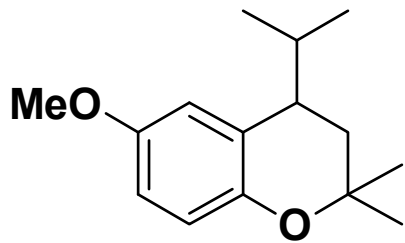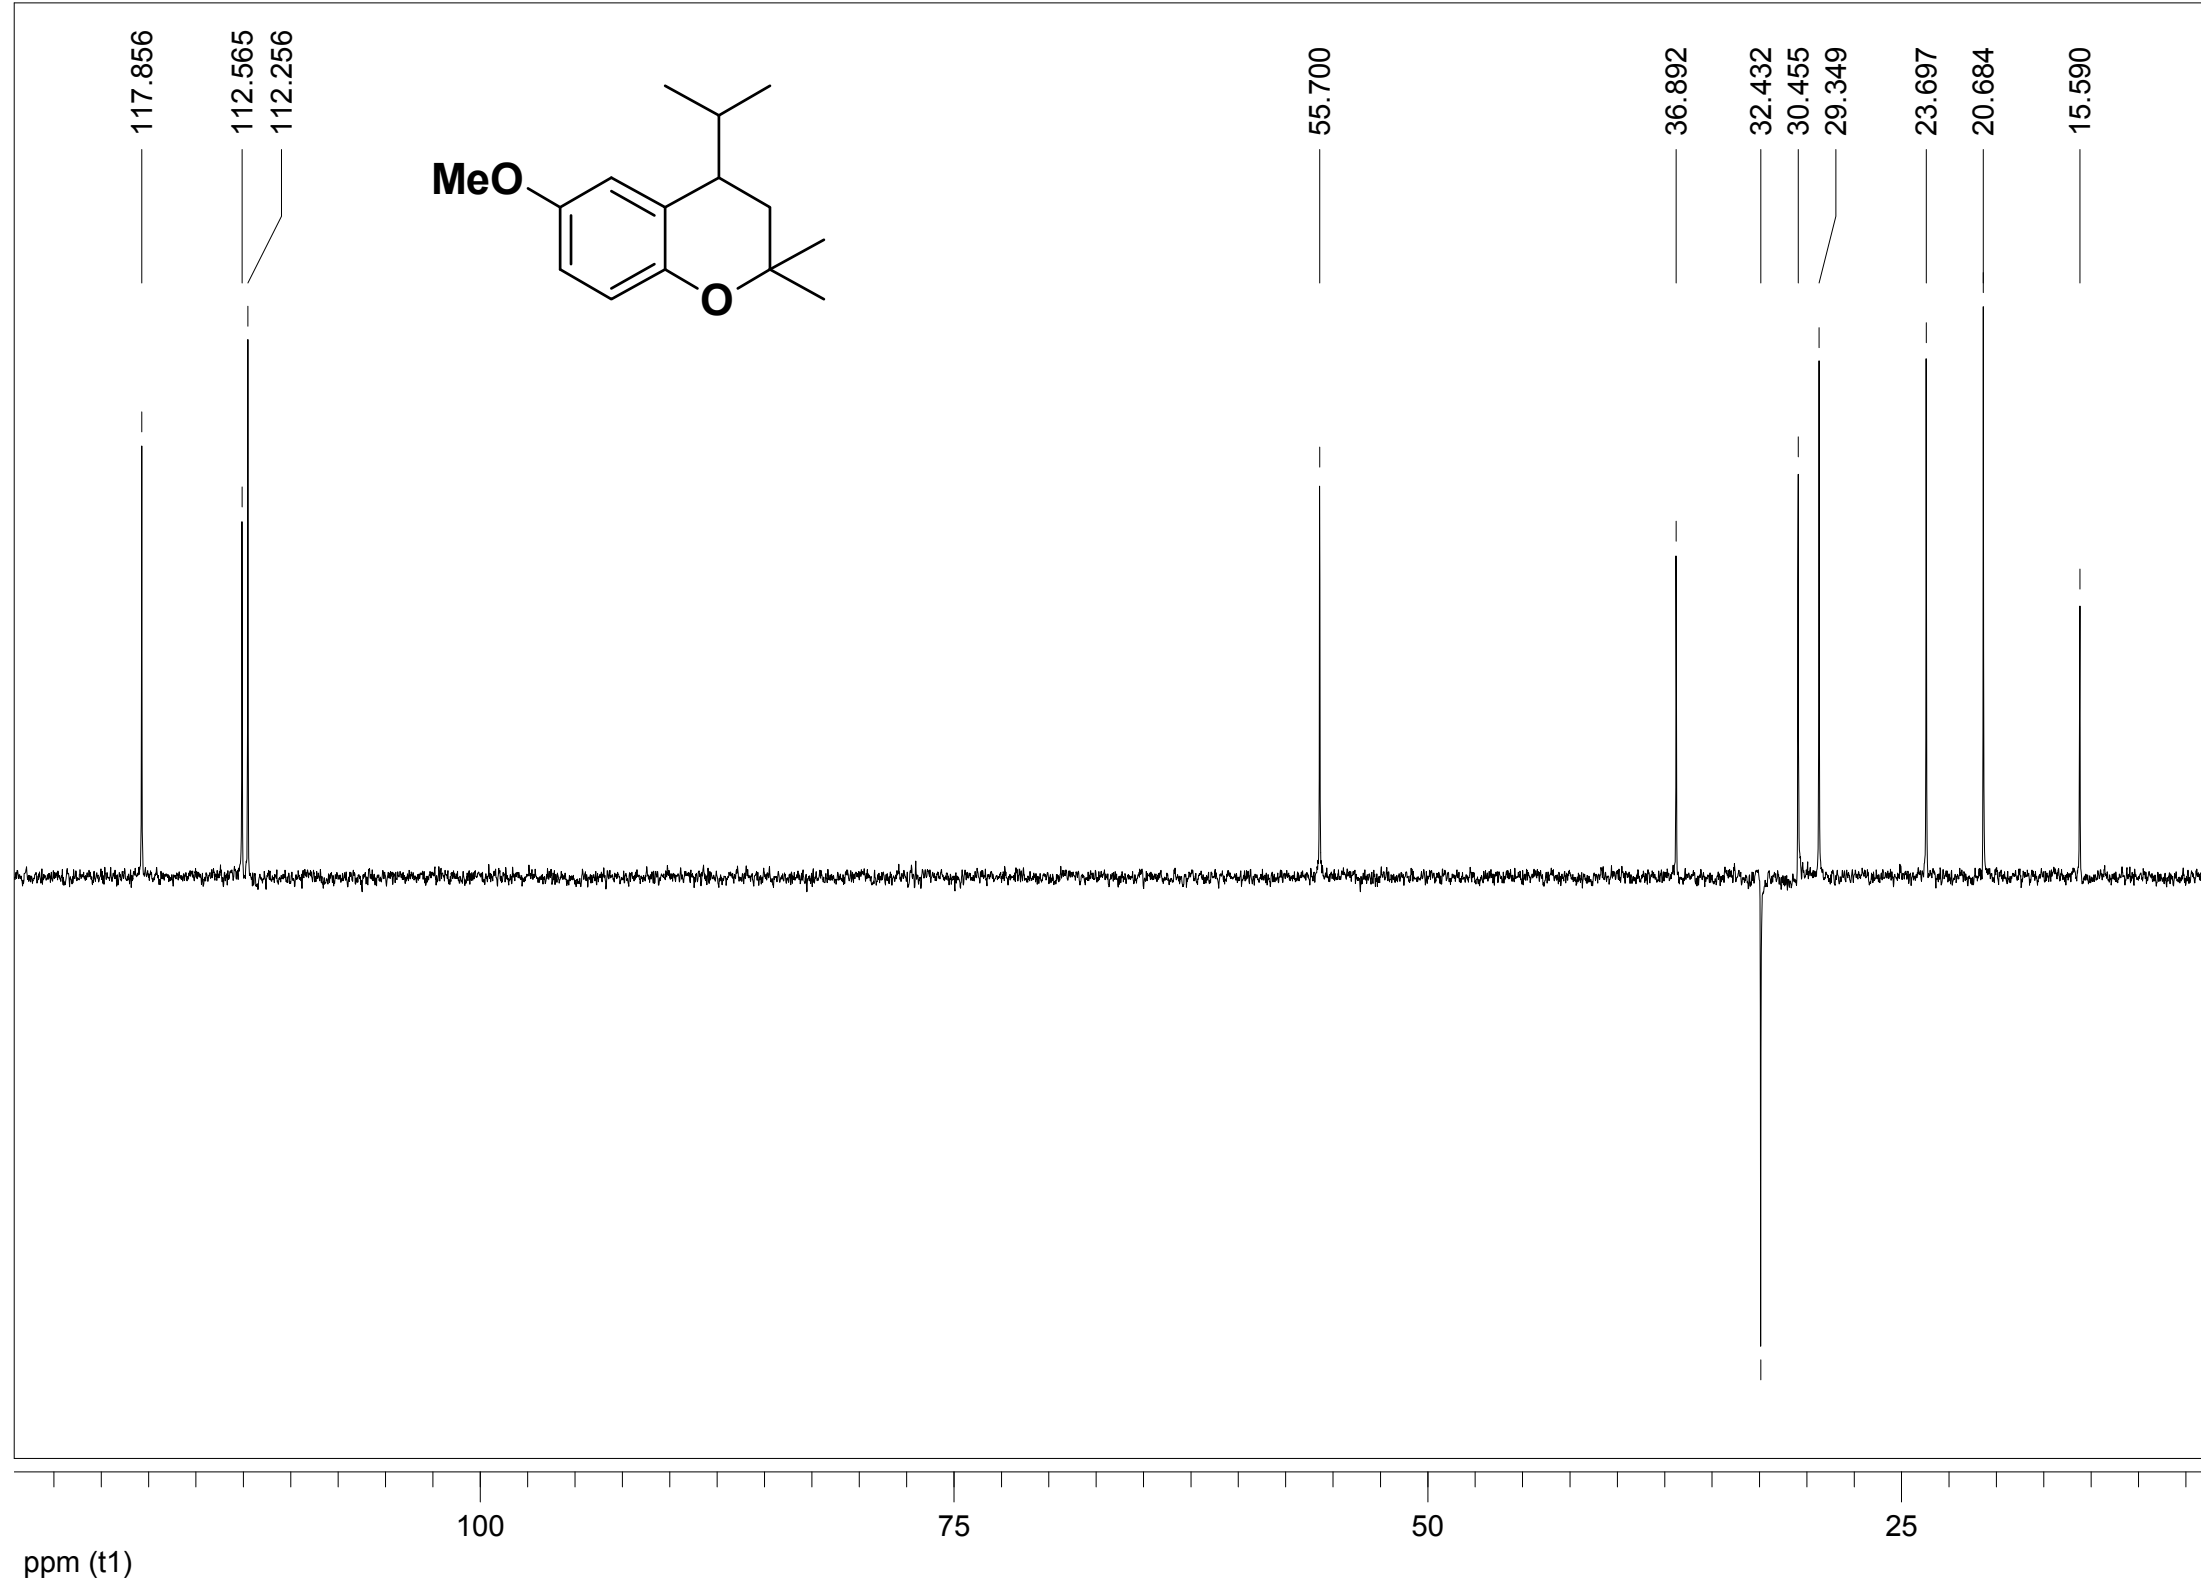

6.700  
6.684  
6.677  
6.584

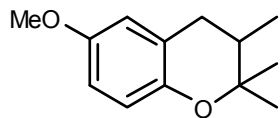

3.744

2.761  
2.747  
2.719  
2.705  
2.480  
2.455  
2.438  
2.413  
1.936  
1.919  
1.911  
1.905  
1.897  
1.368  
1.140  
1.015  
0.998

0.94

1.01

0.32

0.31

0.30

1.03

1.00

1.06

ppm (t1)

7.00 6.50 6.00 5.50 5.00 4.50 4.00 3.50 3.00 2.50 2.00 1.50 1.00 0.50

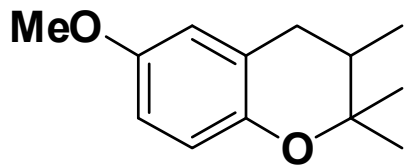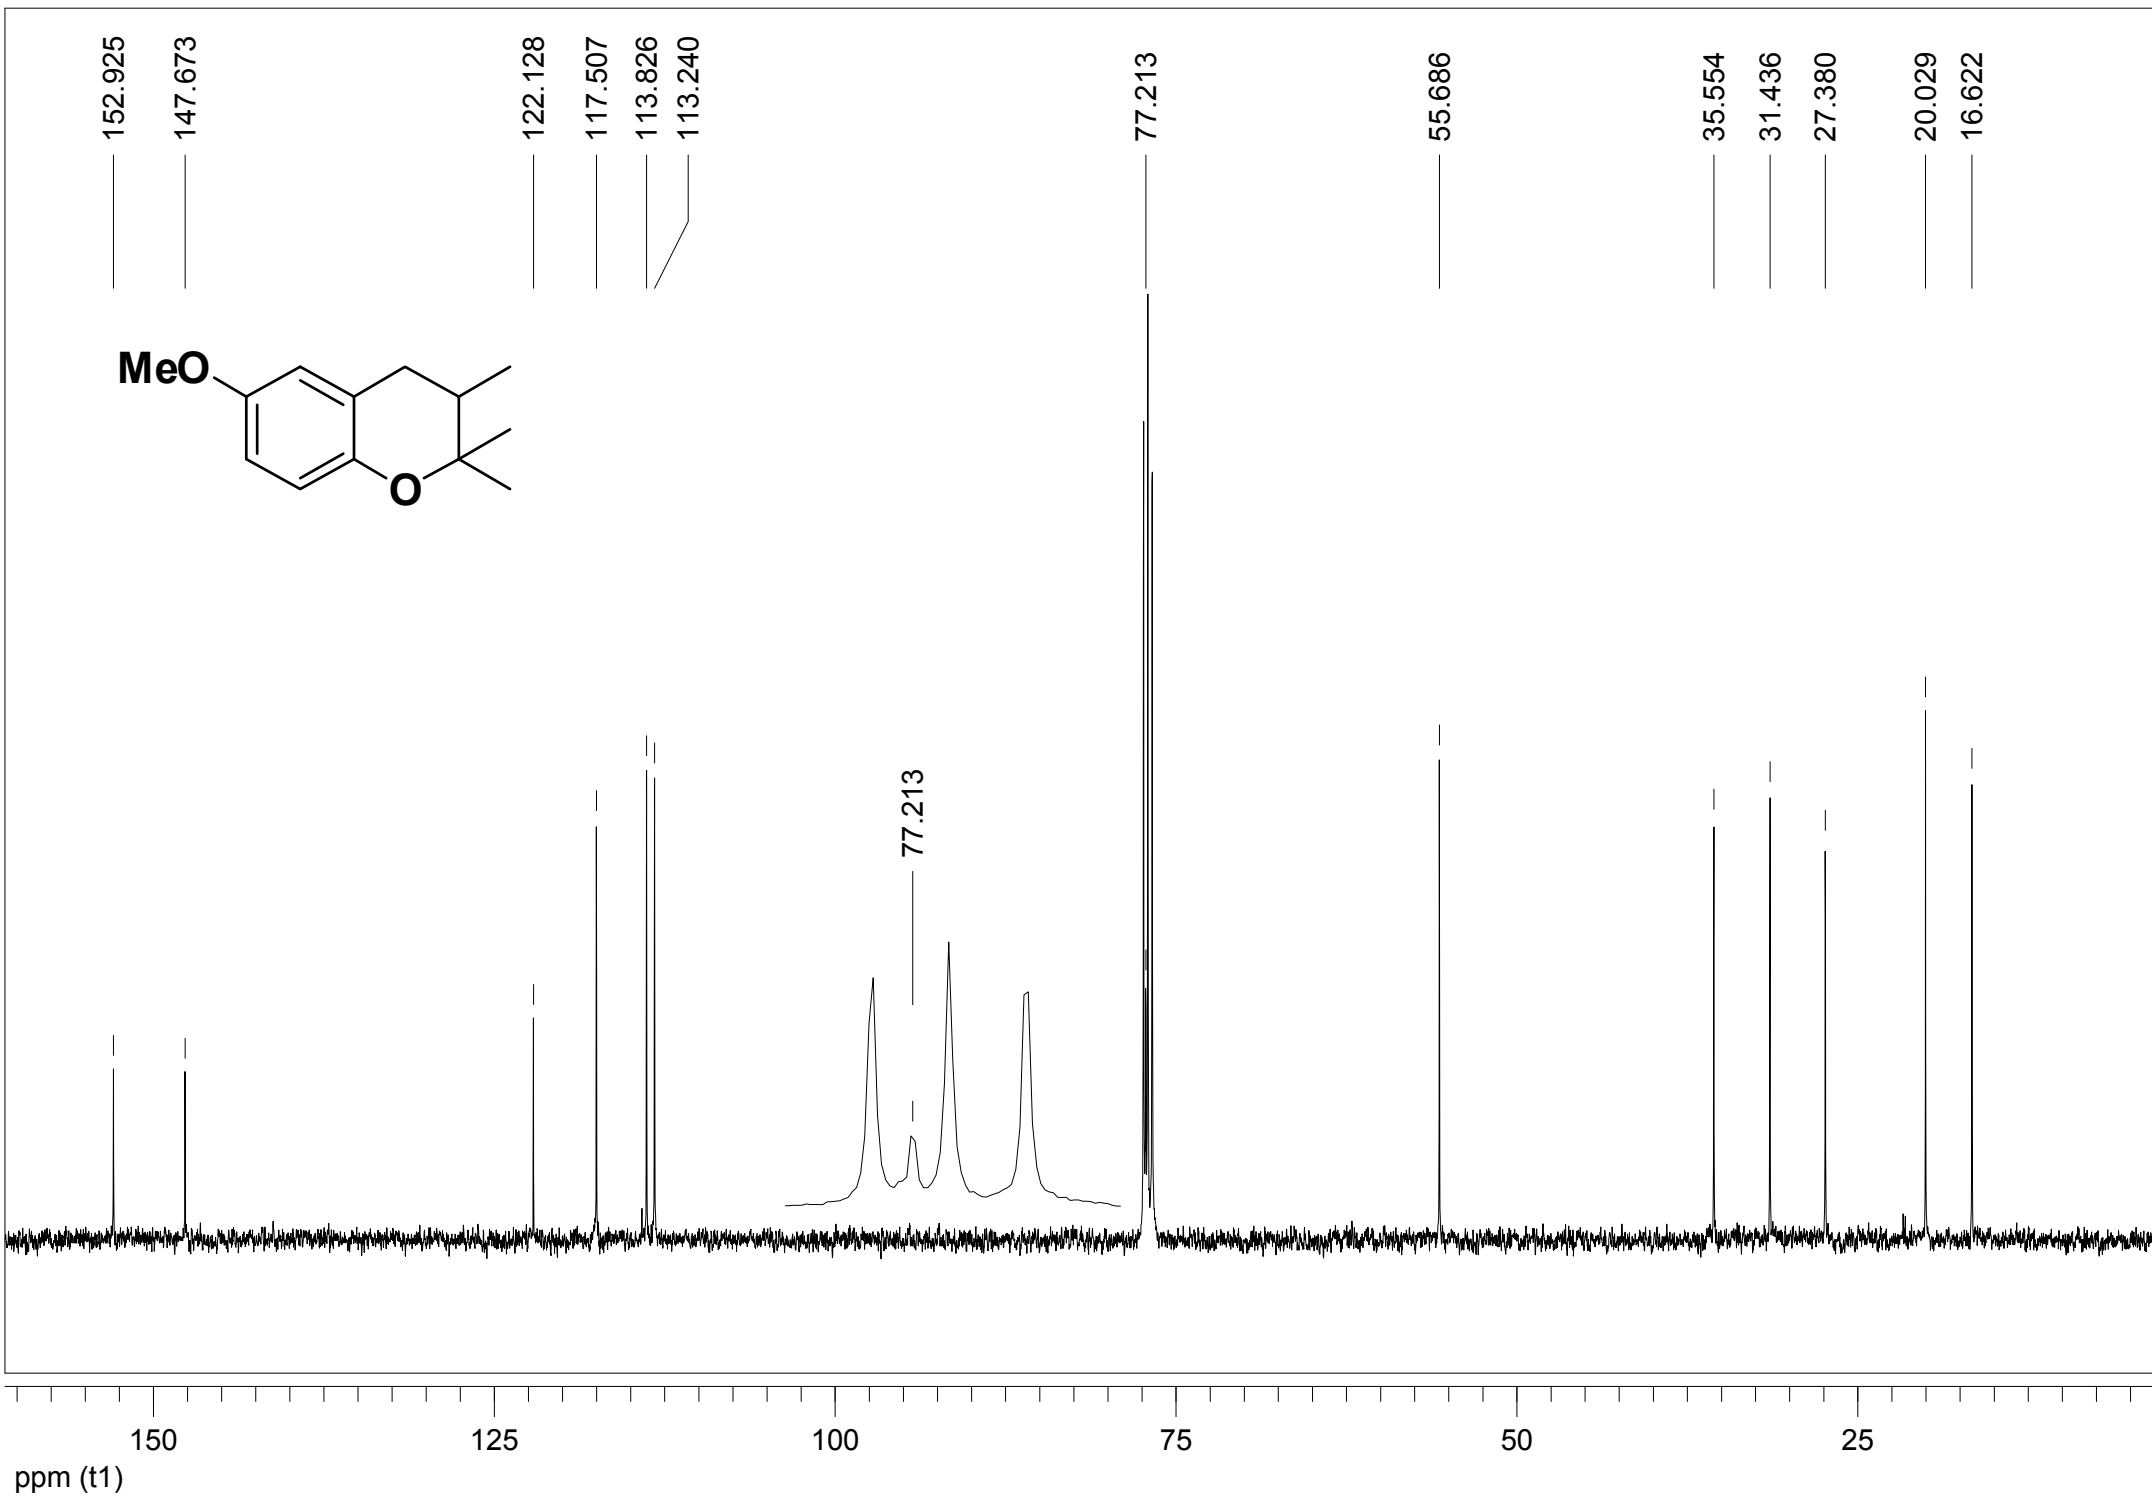

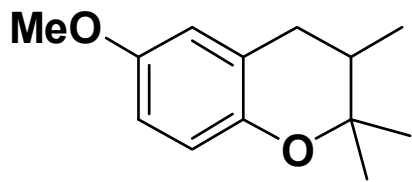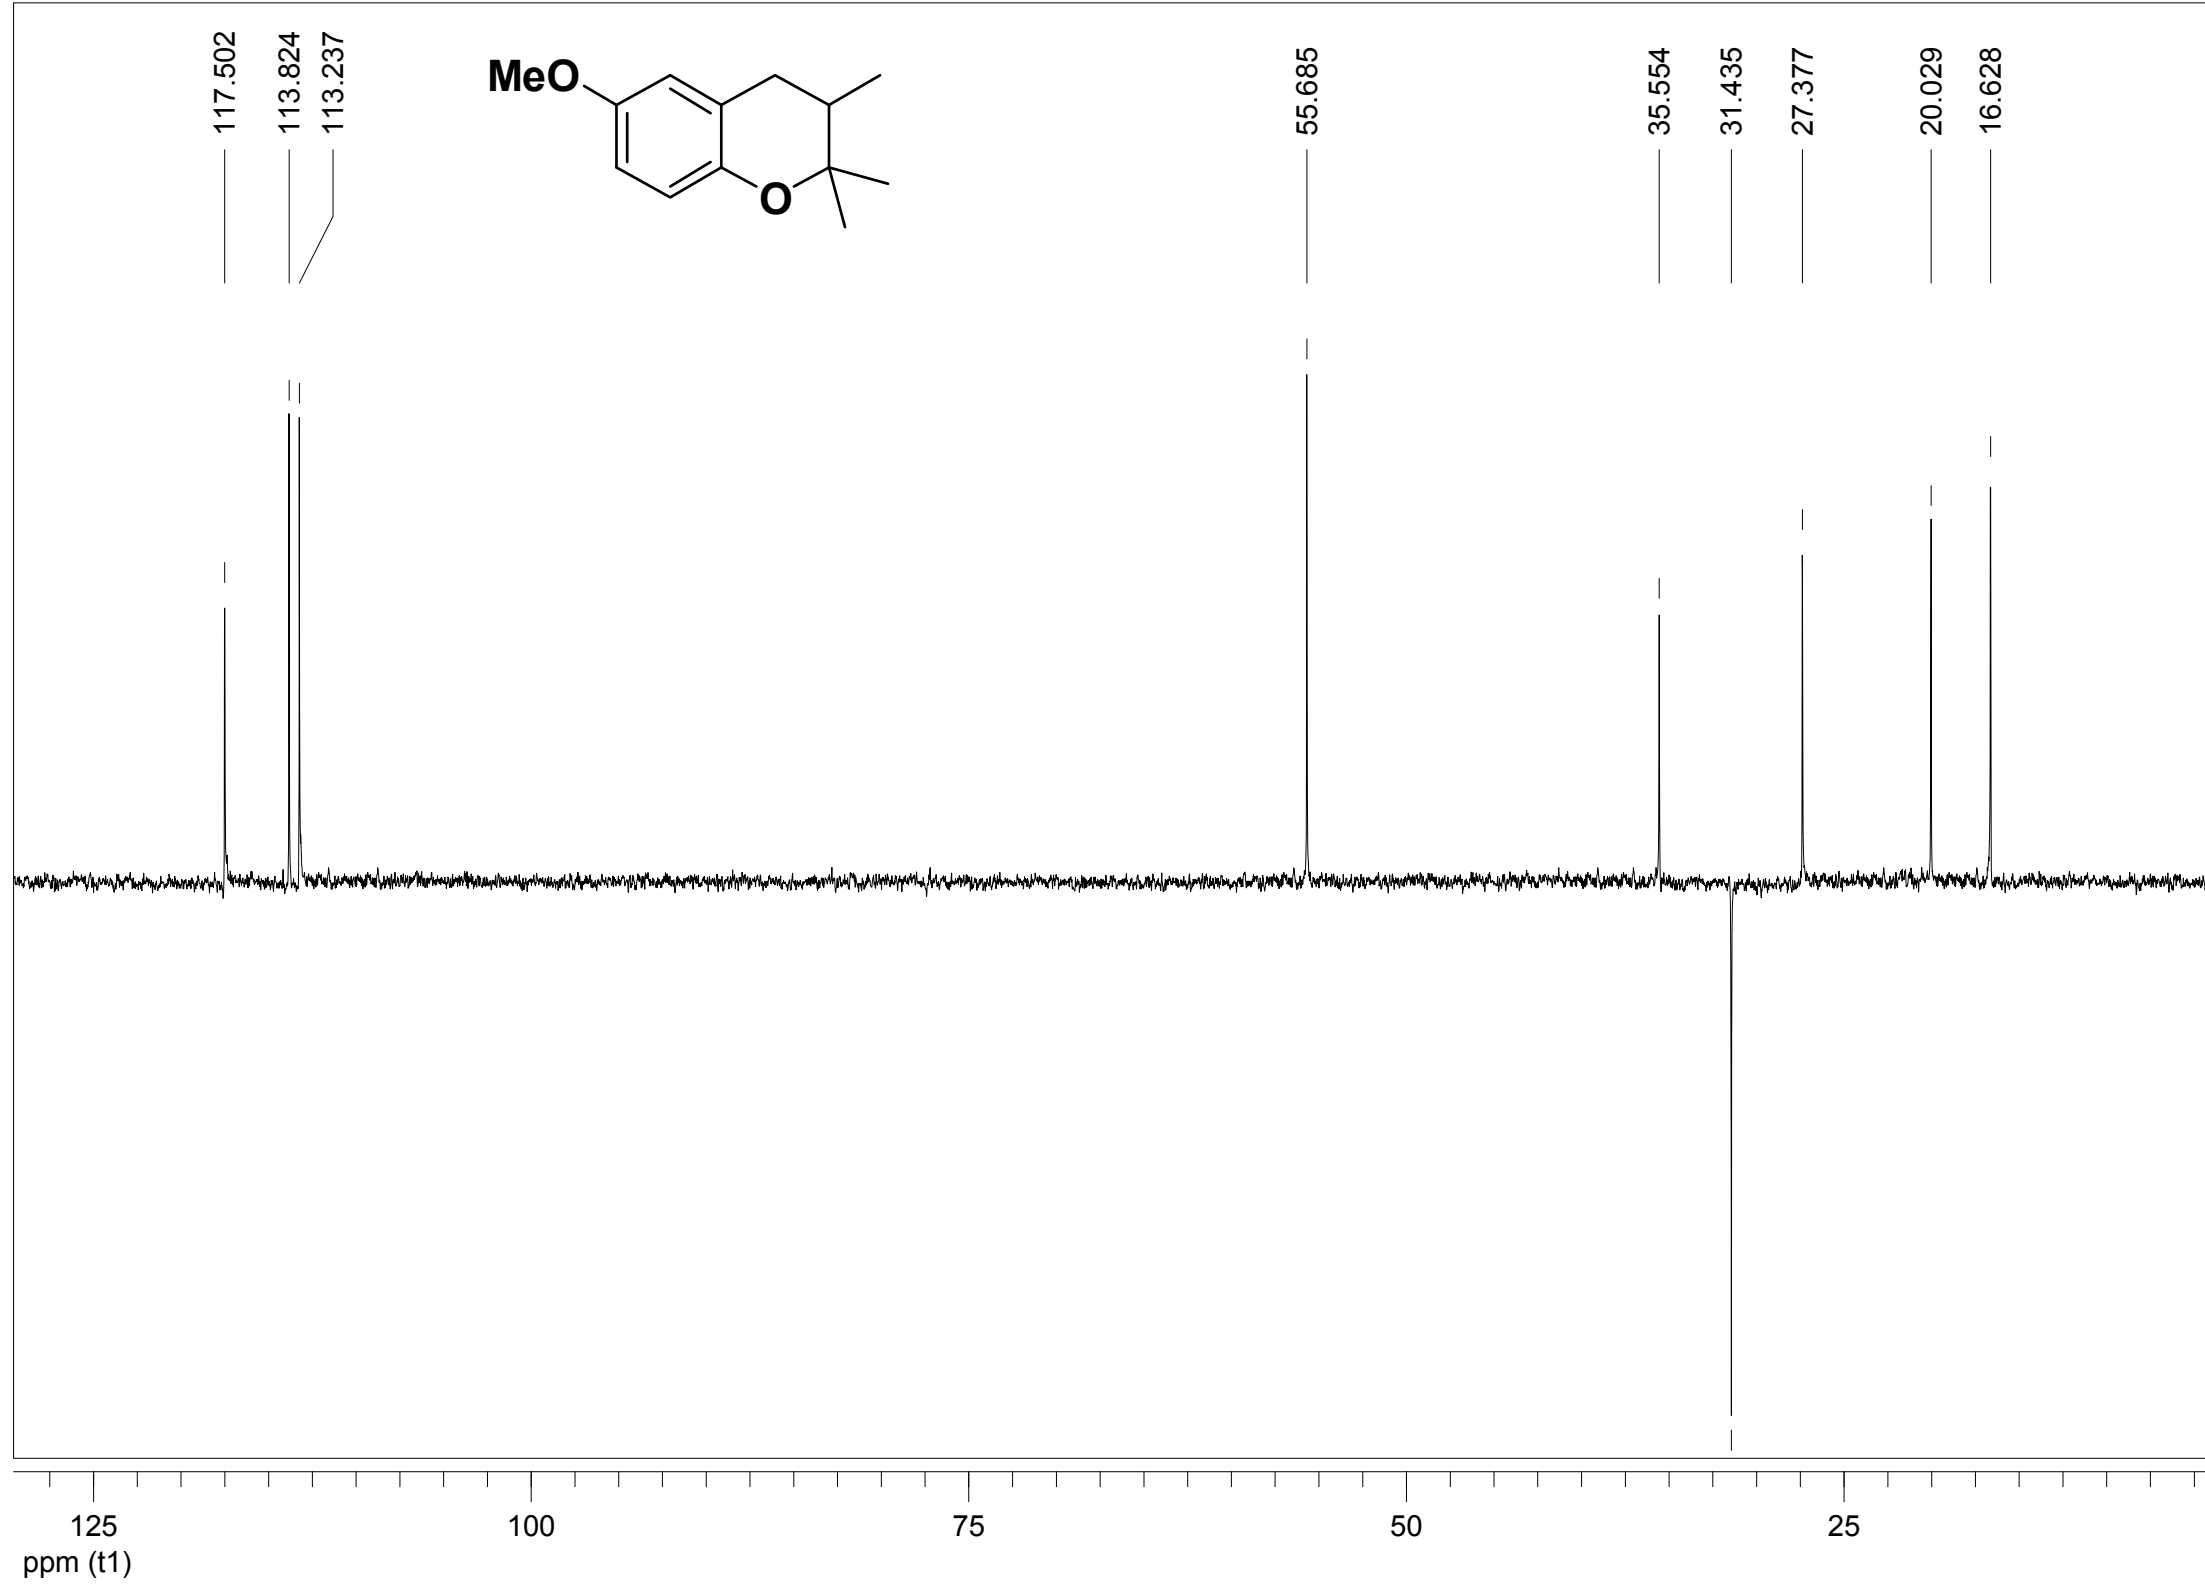

6.726  
6.699  
6.635

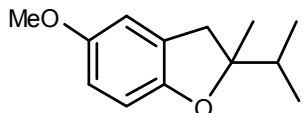

3.746

3.140  
3.101

2.790  
2.751

2.009  
1.992  
1.975

1.328

1.003  
0.986  
0.949  
0.932

99.7

00.0

48.0

88.0

06.0

88.3

96.5

ppm (t1)

7.00 6.50 6.00 5.50 5.00 4.50 4.00 3.50 3.00 2.50 2.00 1.50 1.00



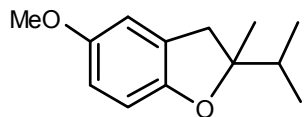

153.616  
153.340

128.001

112.723  
111.446  
109.017

91.705

56.030

39.373  
37.049

23.235

17.480  
17.414

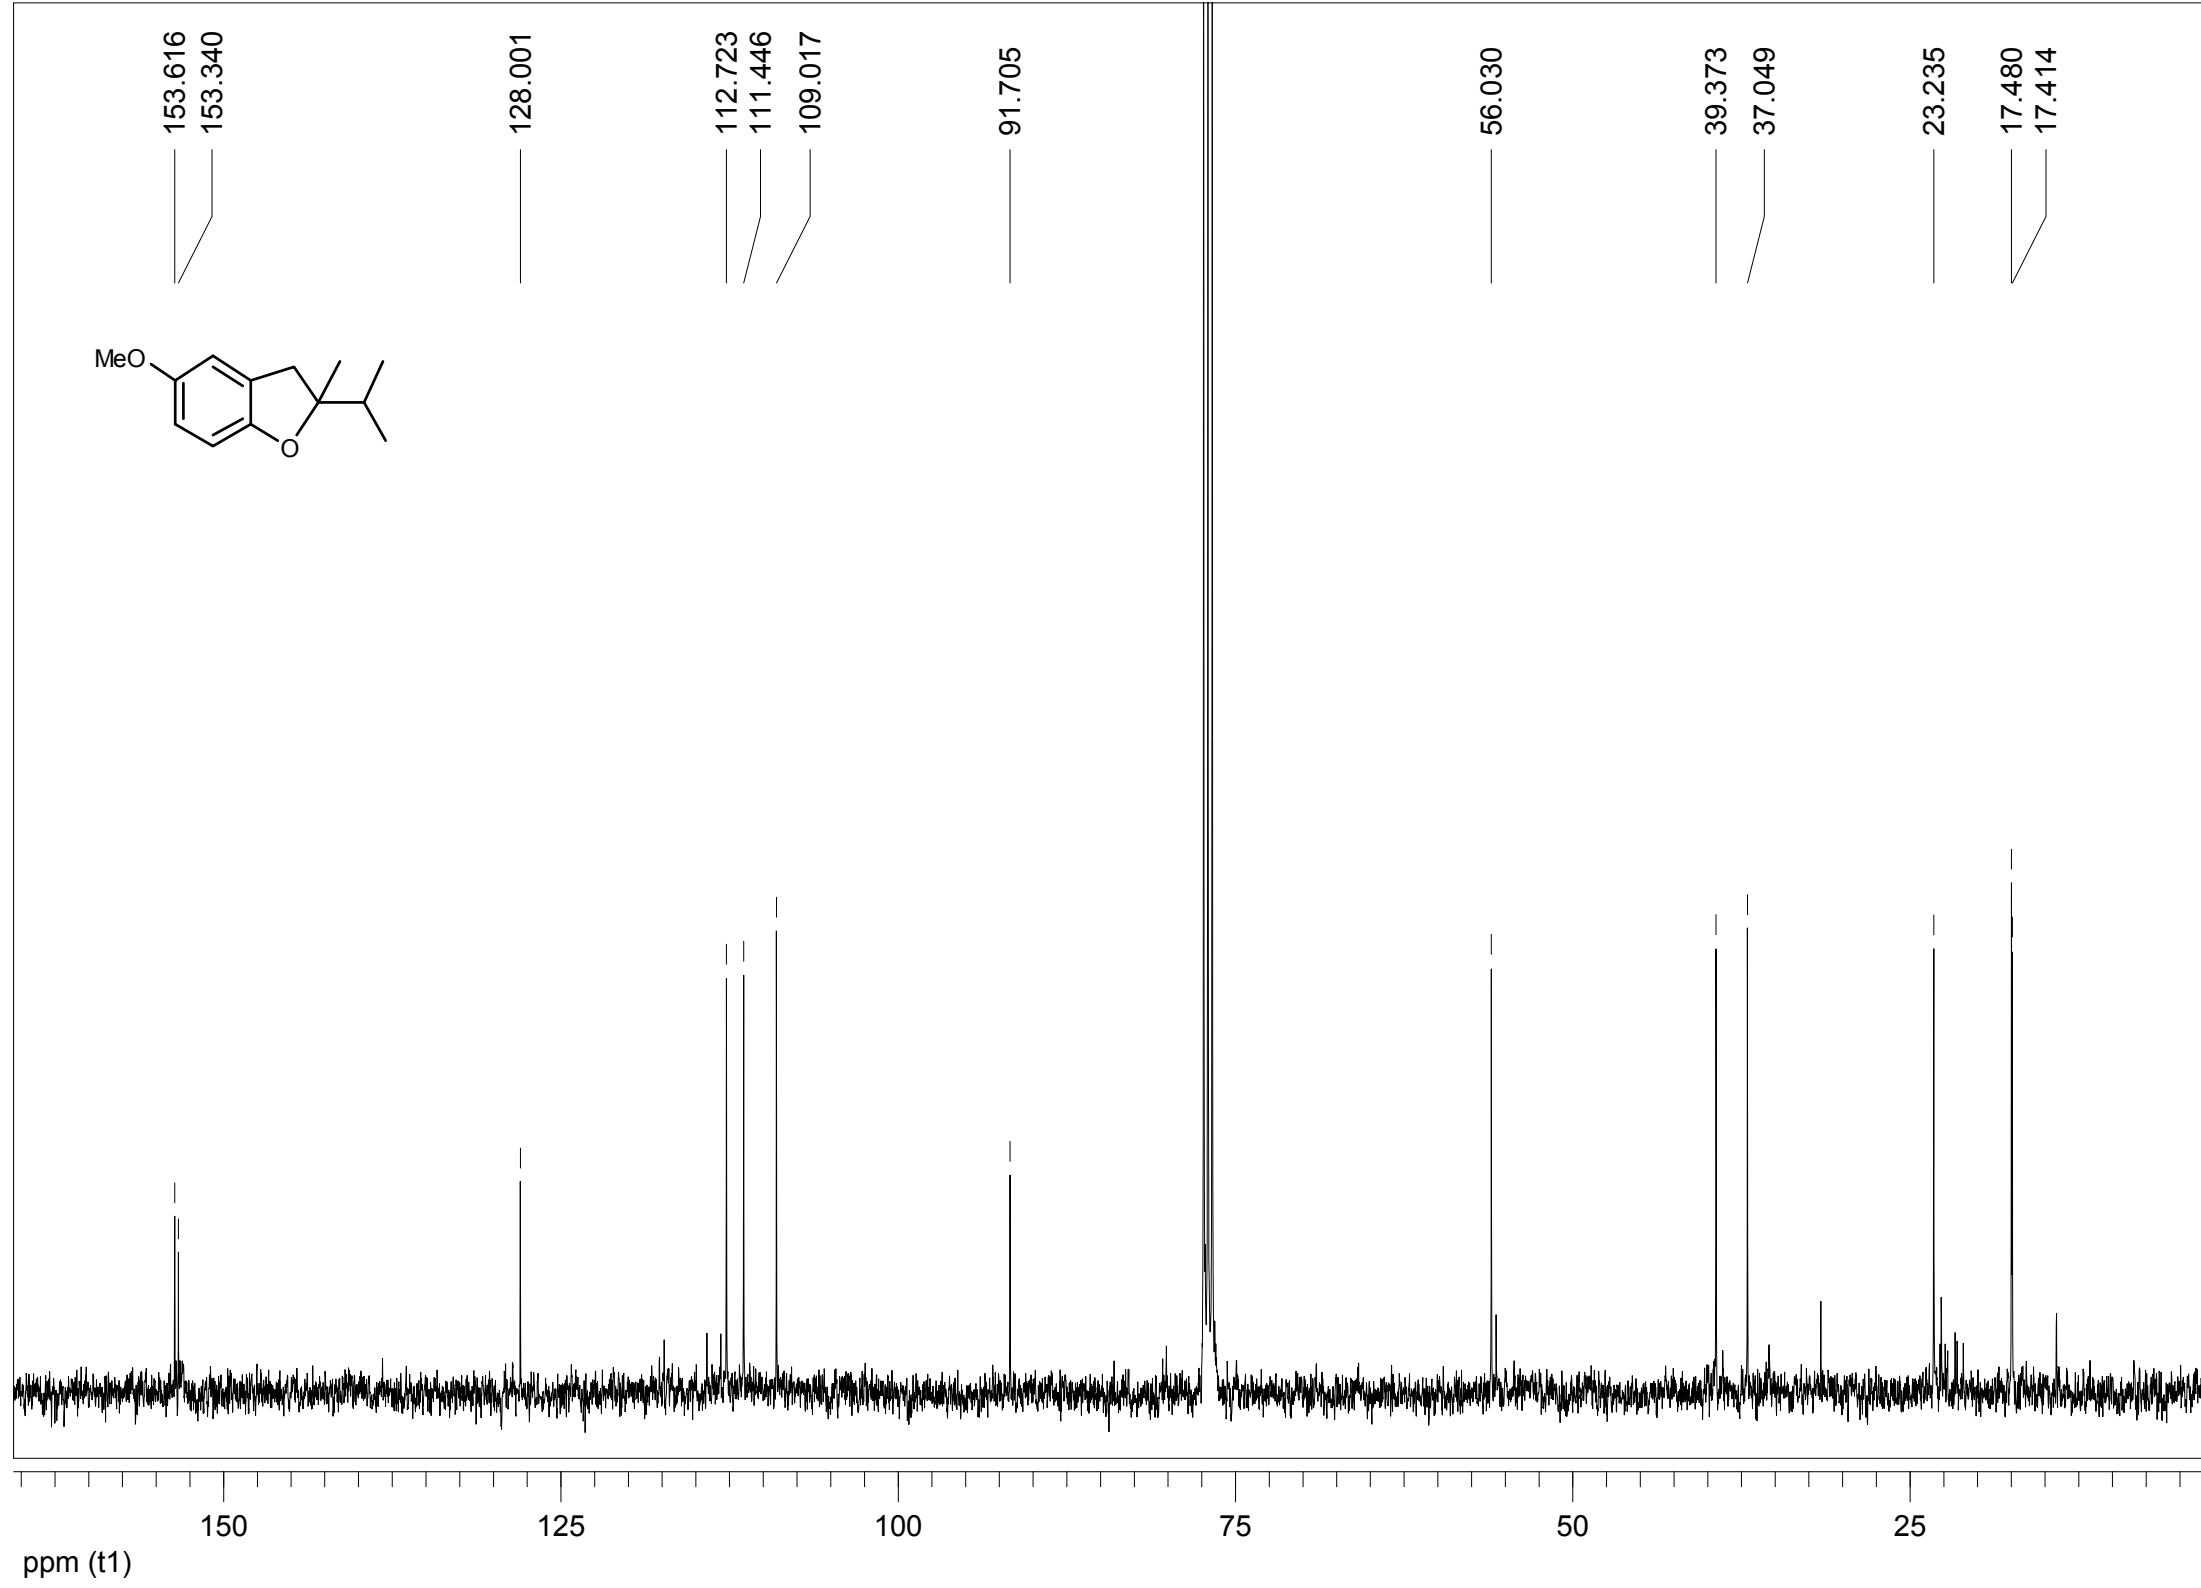

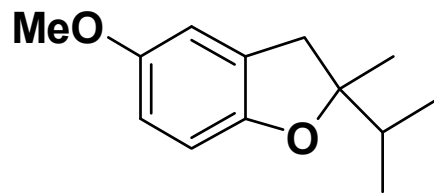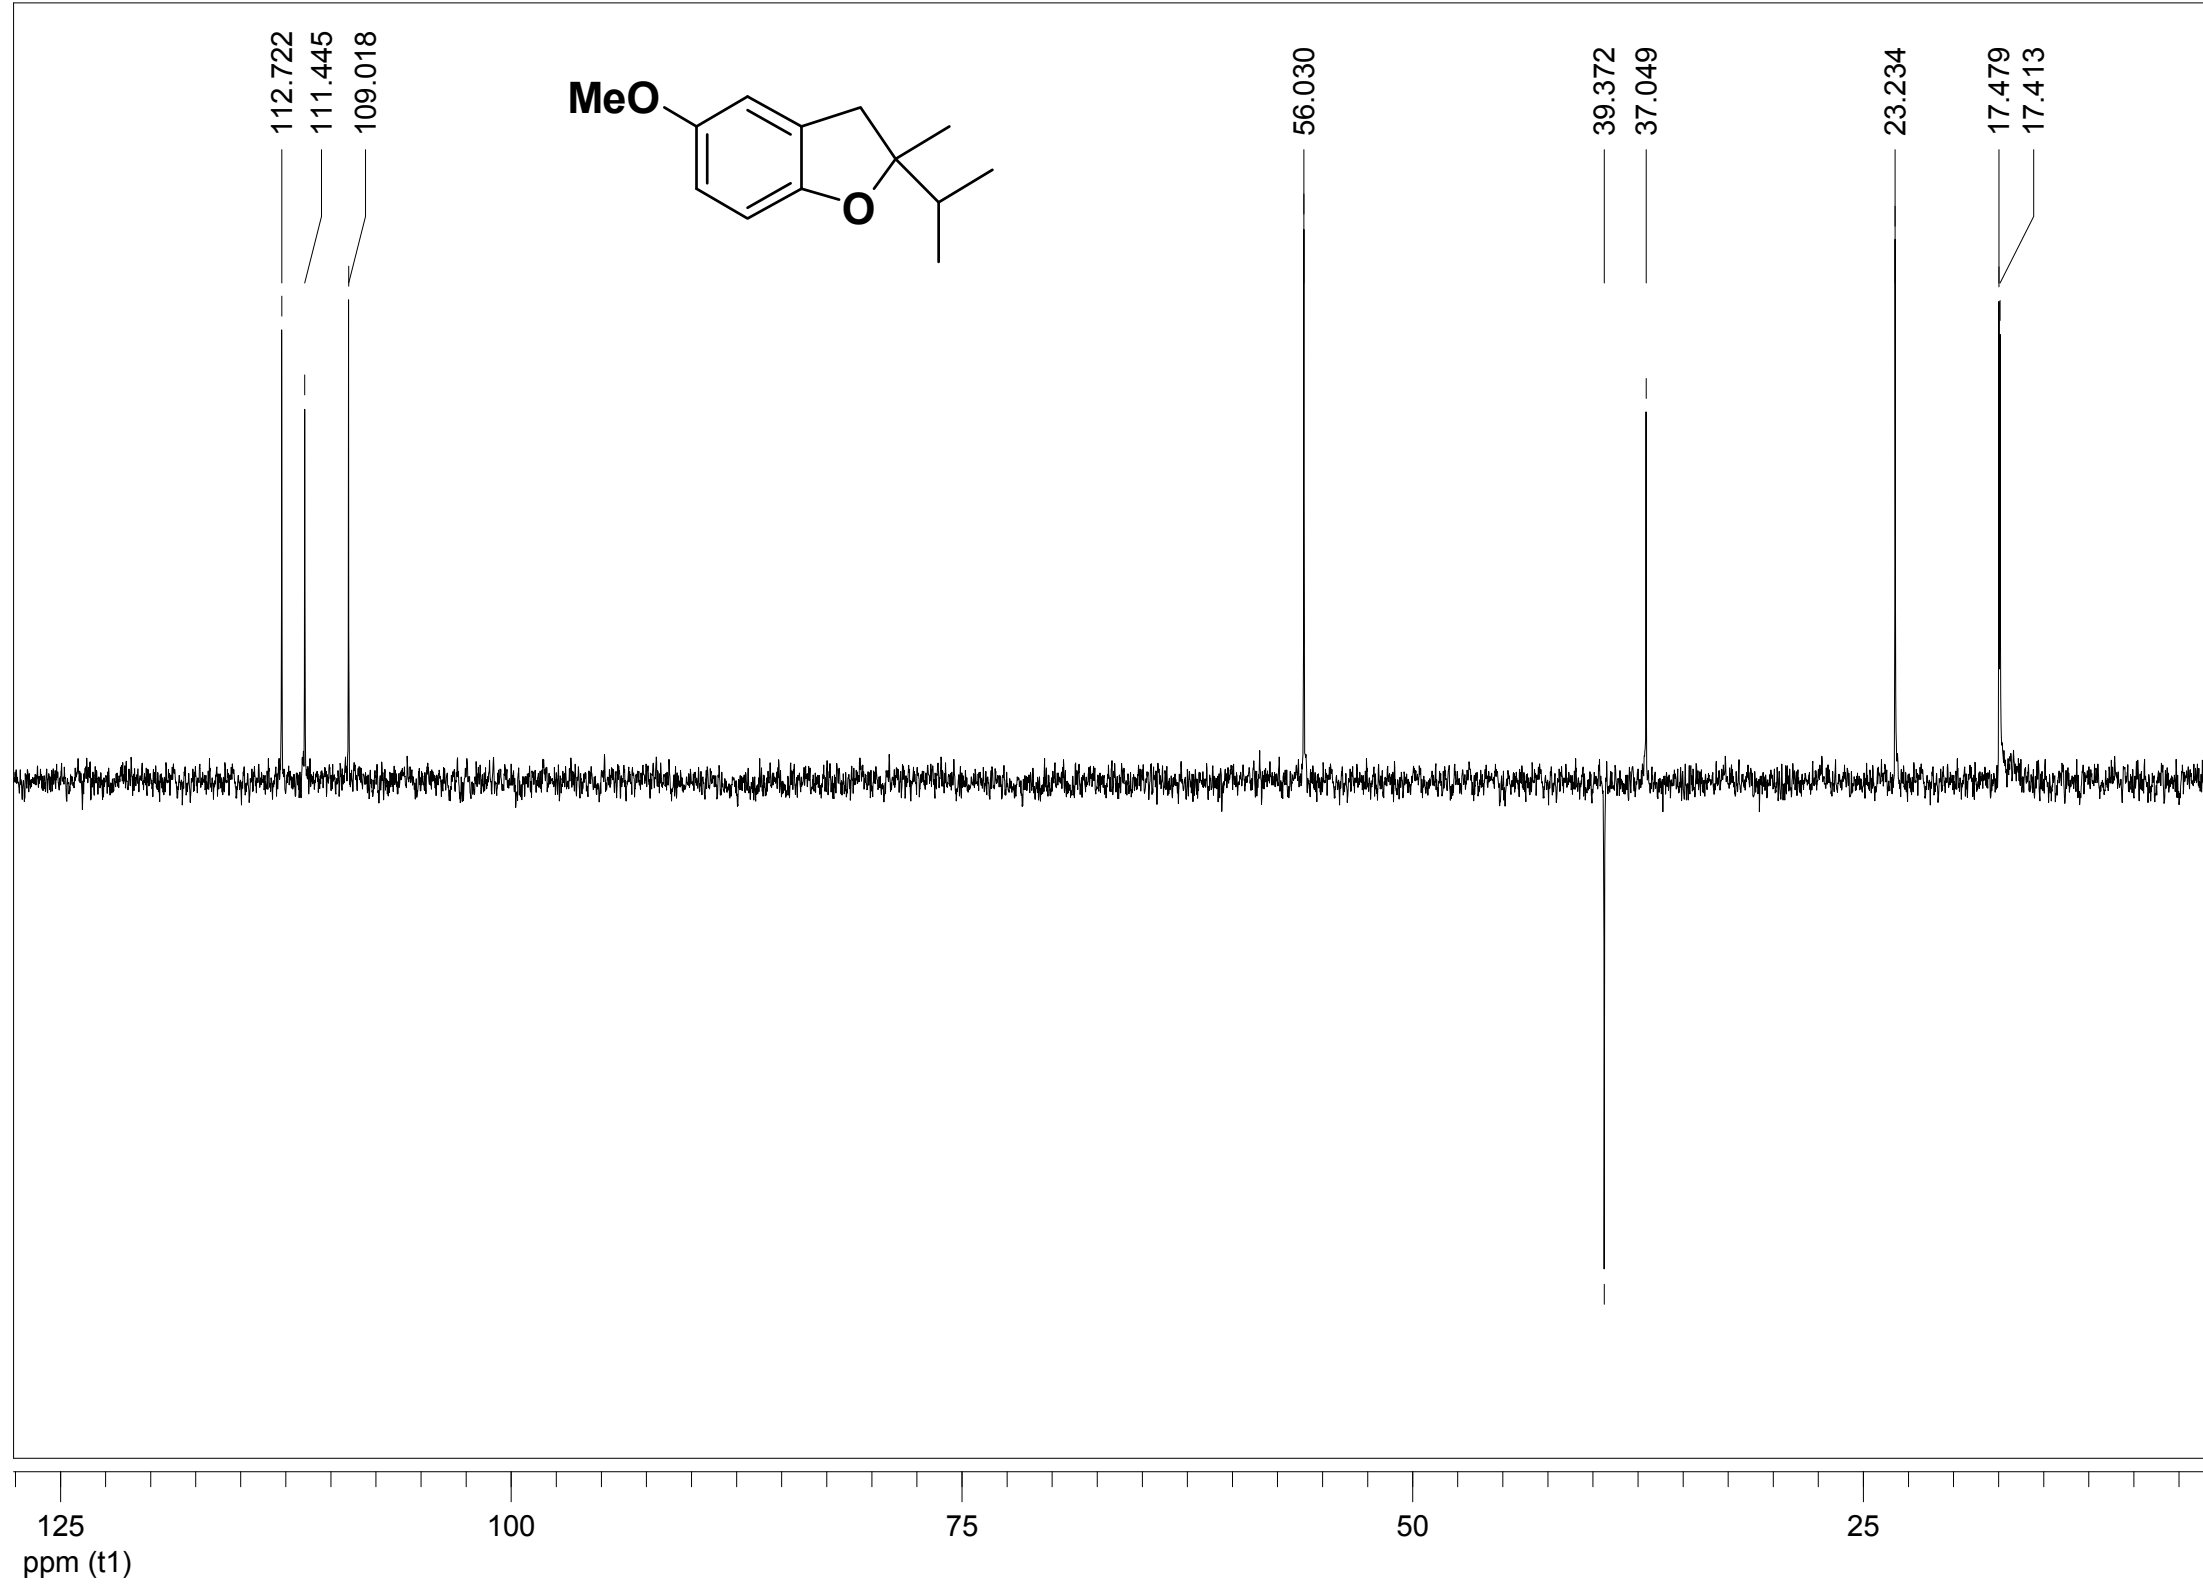

6.709  
6.694  
6.687  
6.609

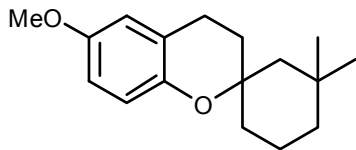

3.756

2.731

1.900  
1.874  
1.839  
1.703  
1.499  
1.470  
1.065  
0.883

2.83

2.95

1.75

12.00

3.34

2.87

7.50  
7.00  
6.50  
6.00  
5.50  
5.00  
4.50  
4.00  
3.50  
3.00  
2.50  
2.00  
1.50  
1.00  
0.50  
ppm (t1)

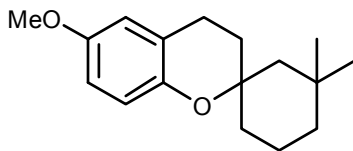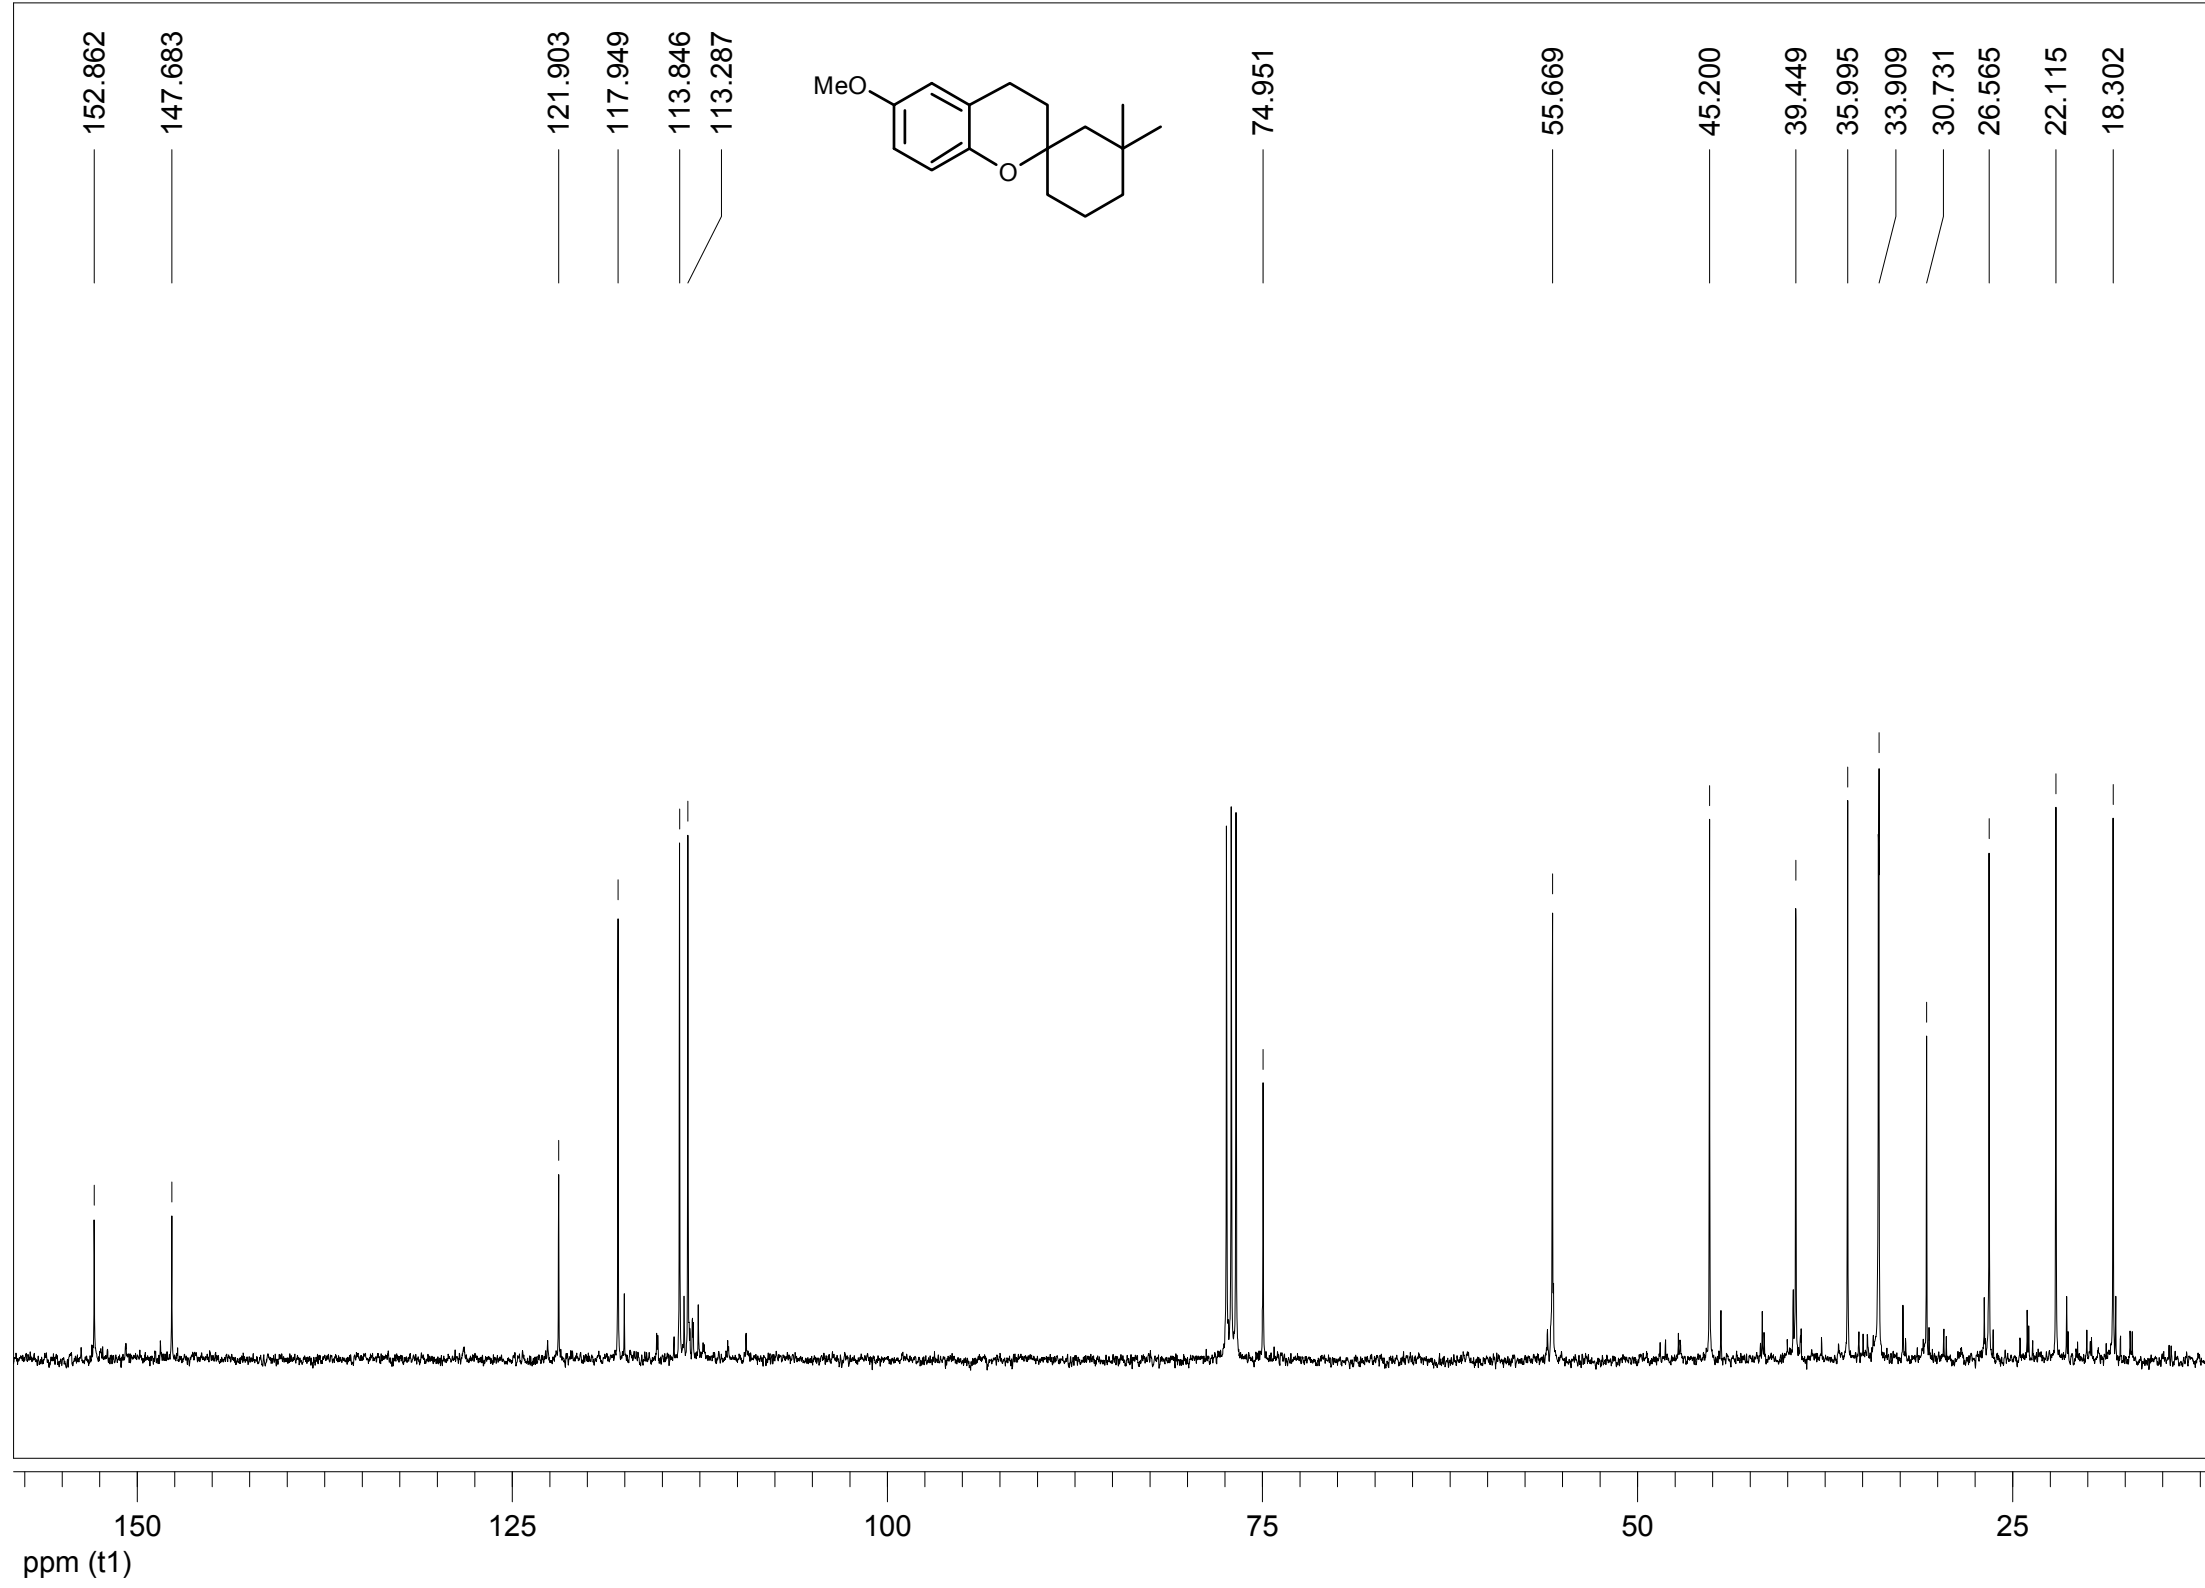

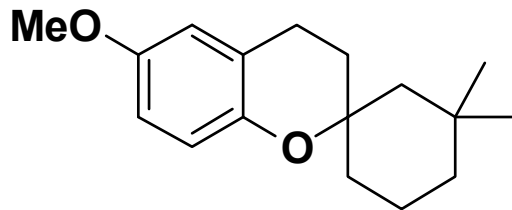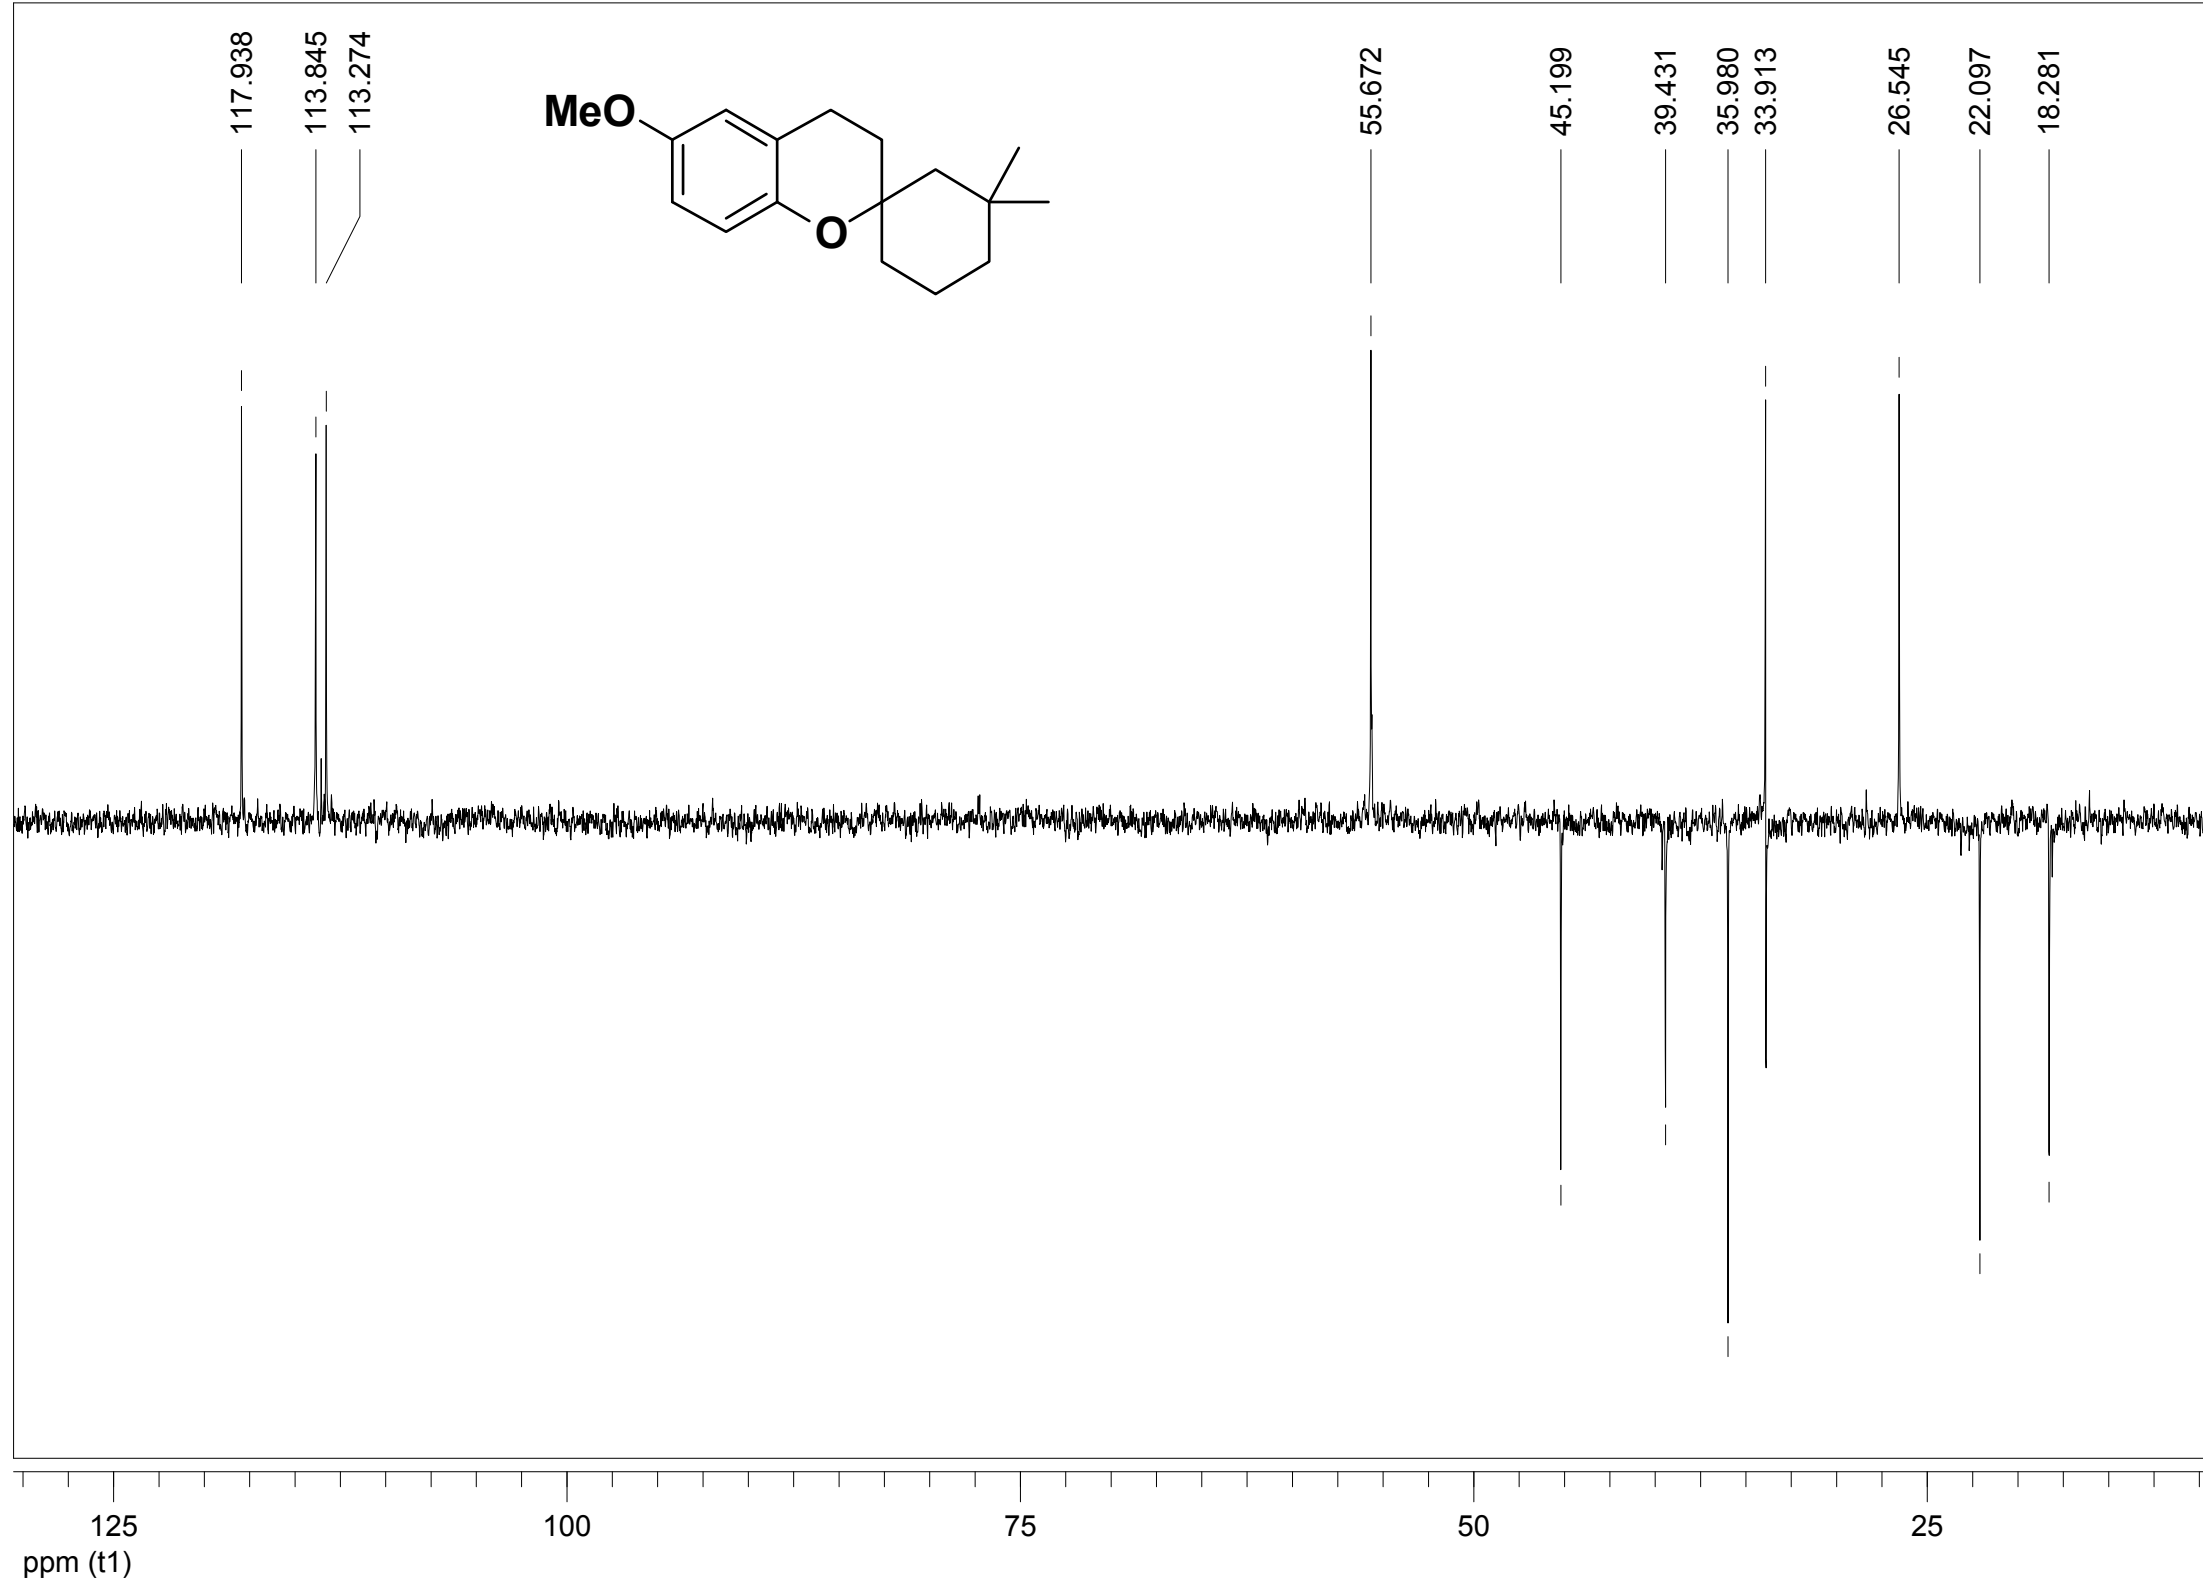

6.723  
6.703  
6.696  
6.673  
6.052  
6.045  
6.036  
6.027  
6.020  
5.806  
5.801  
5.781  
5.776

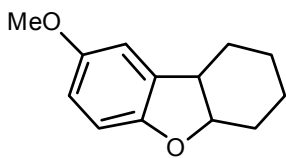

3.756  
3.561  
3.554  
3.547  
3.540

2.124  
2.118  
2.013  
2.001  
1.802  
1.791  
1.669  
1.651  
1.647  
1.640  
1.627

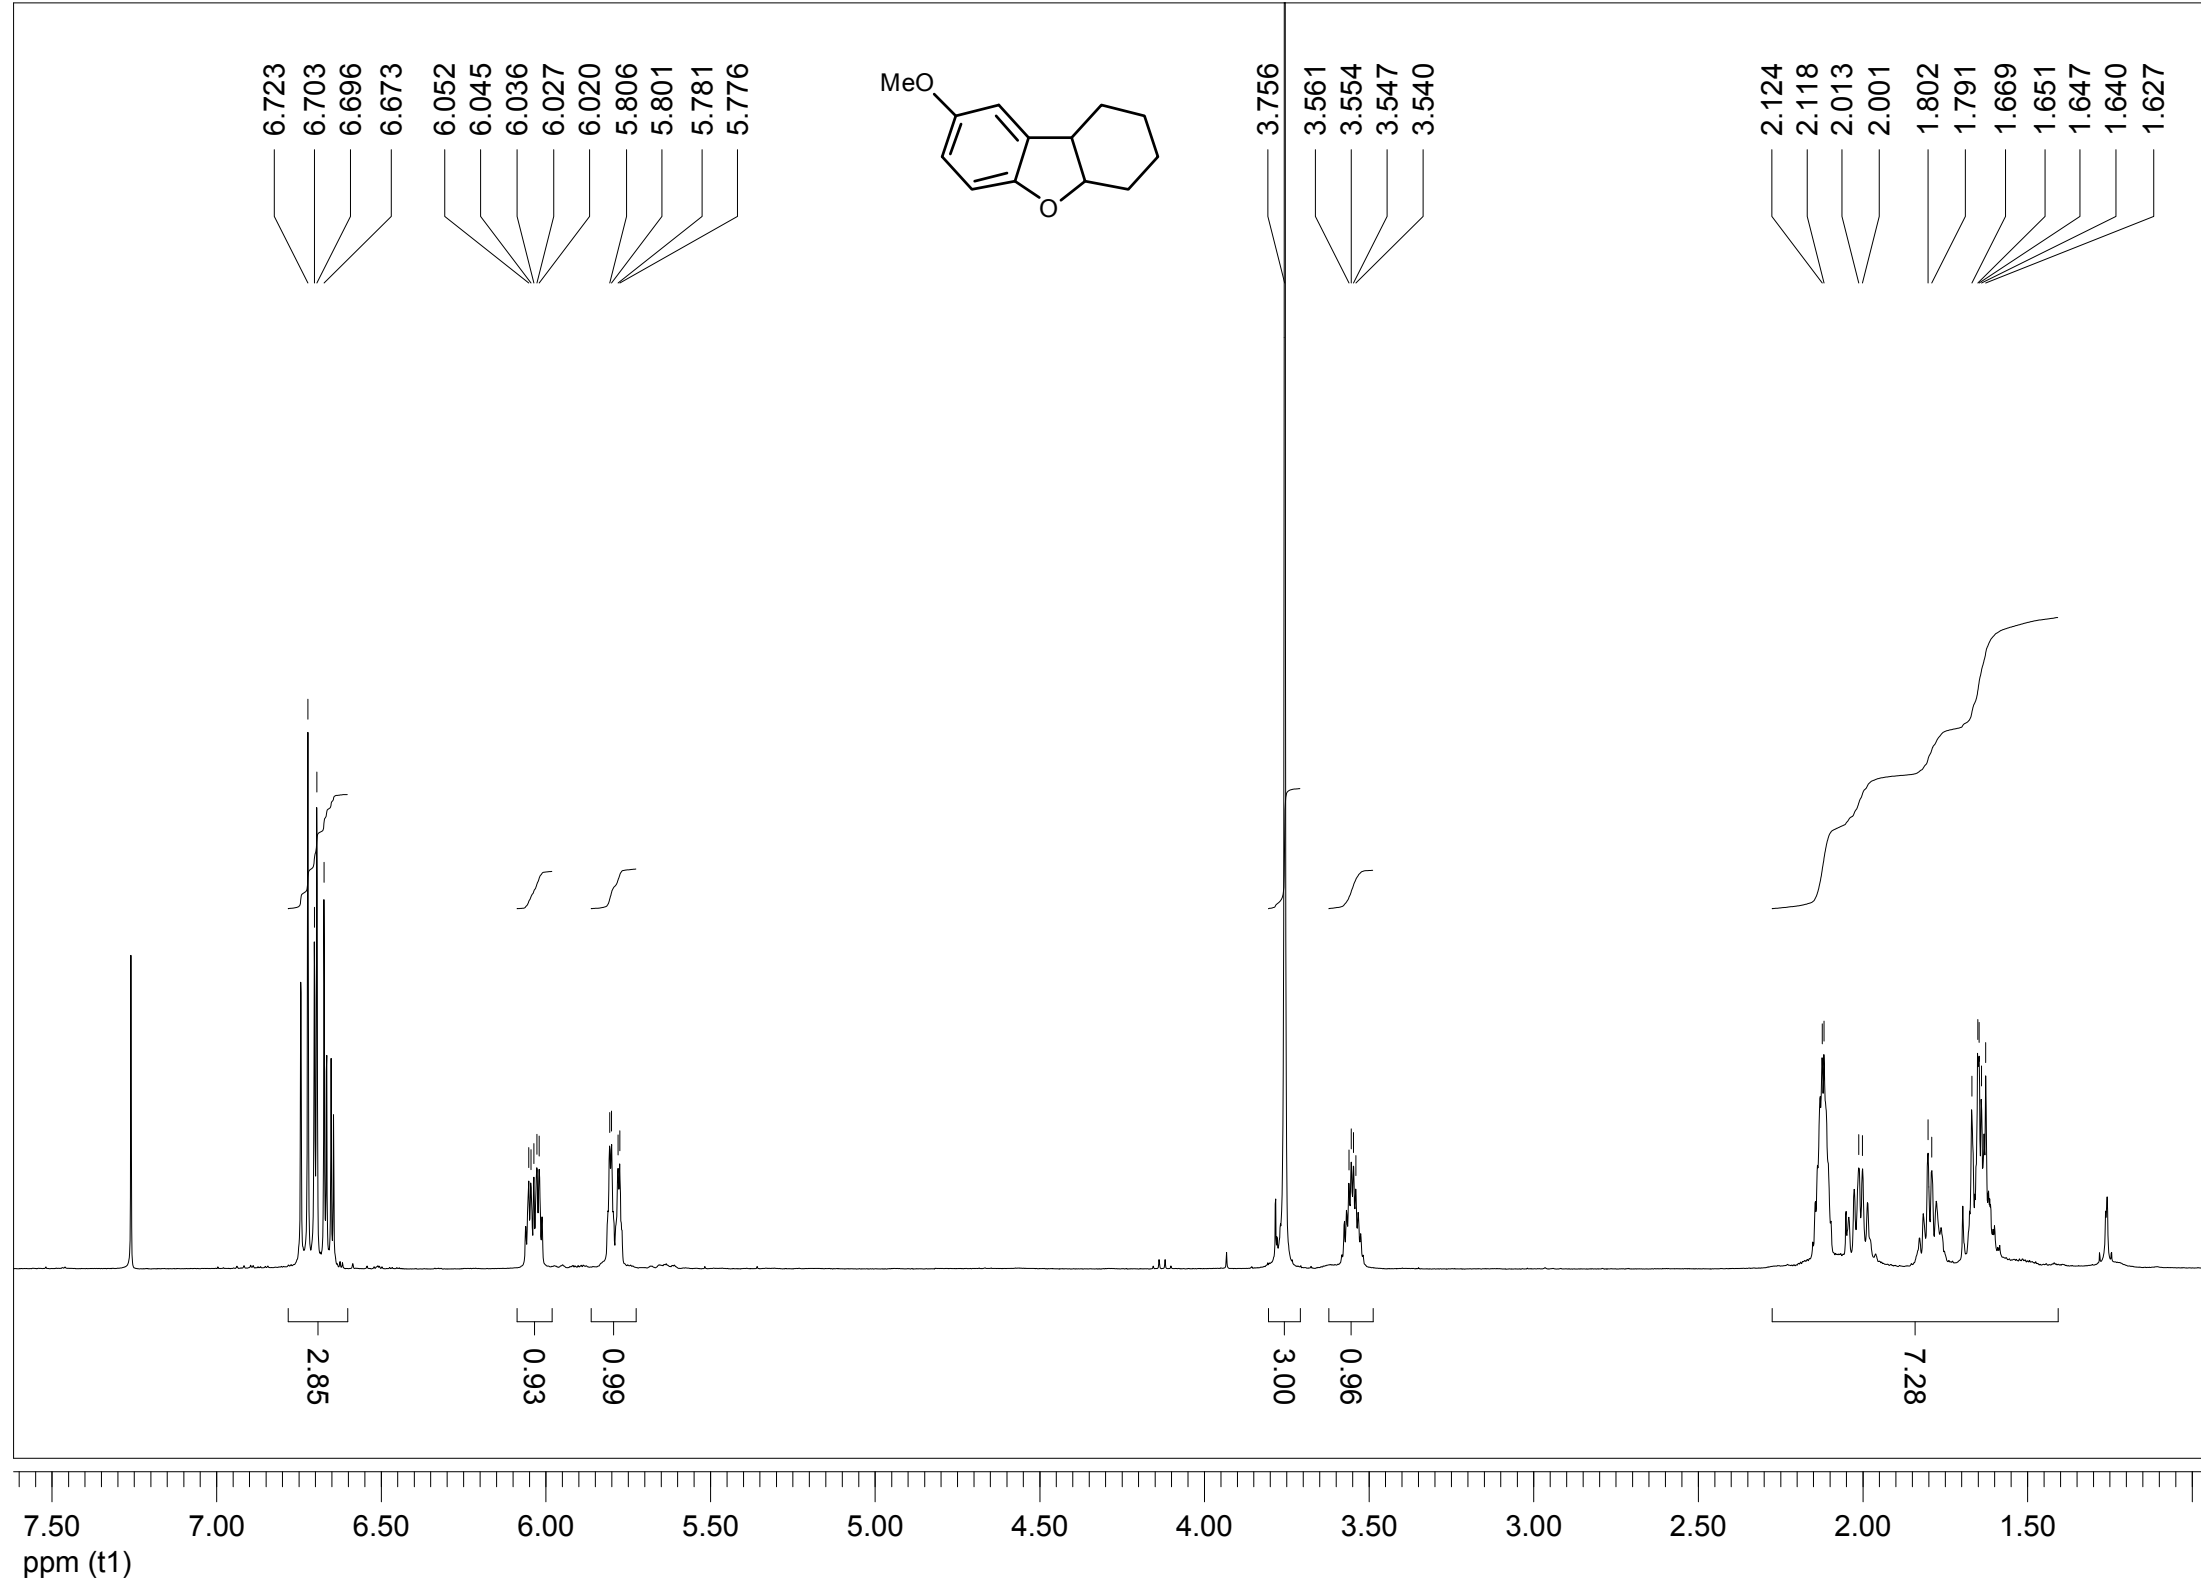

7.50 7.00 6.50 6.00 5.50 5.00 4.50 4.00 3.50 3.00 2.50 2.00 1.50  
ppm (t1)

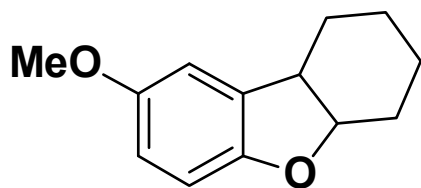

154.112  
153.375

134.651

112.085  
110.292  
109.801

82.697

55.983

41.151

28.282  
27.646  
22.204  
20.734

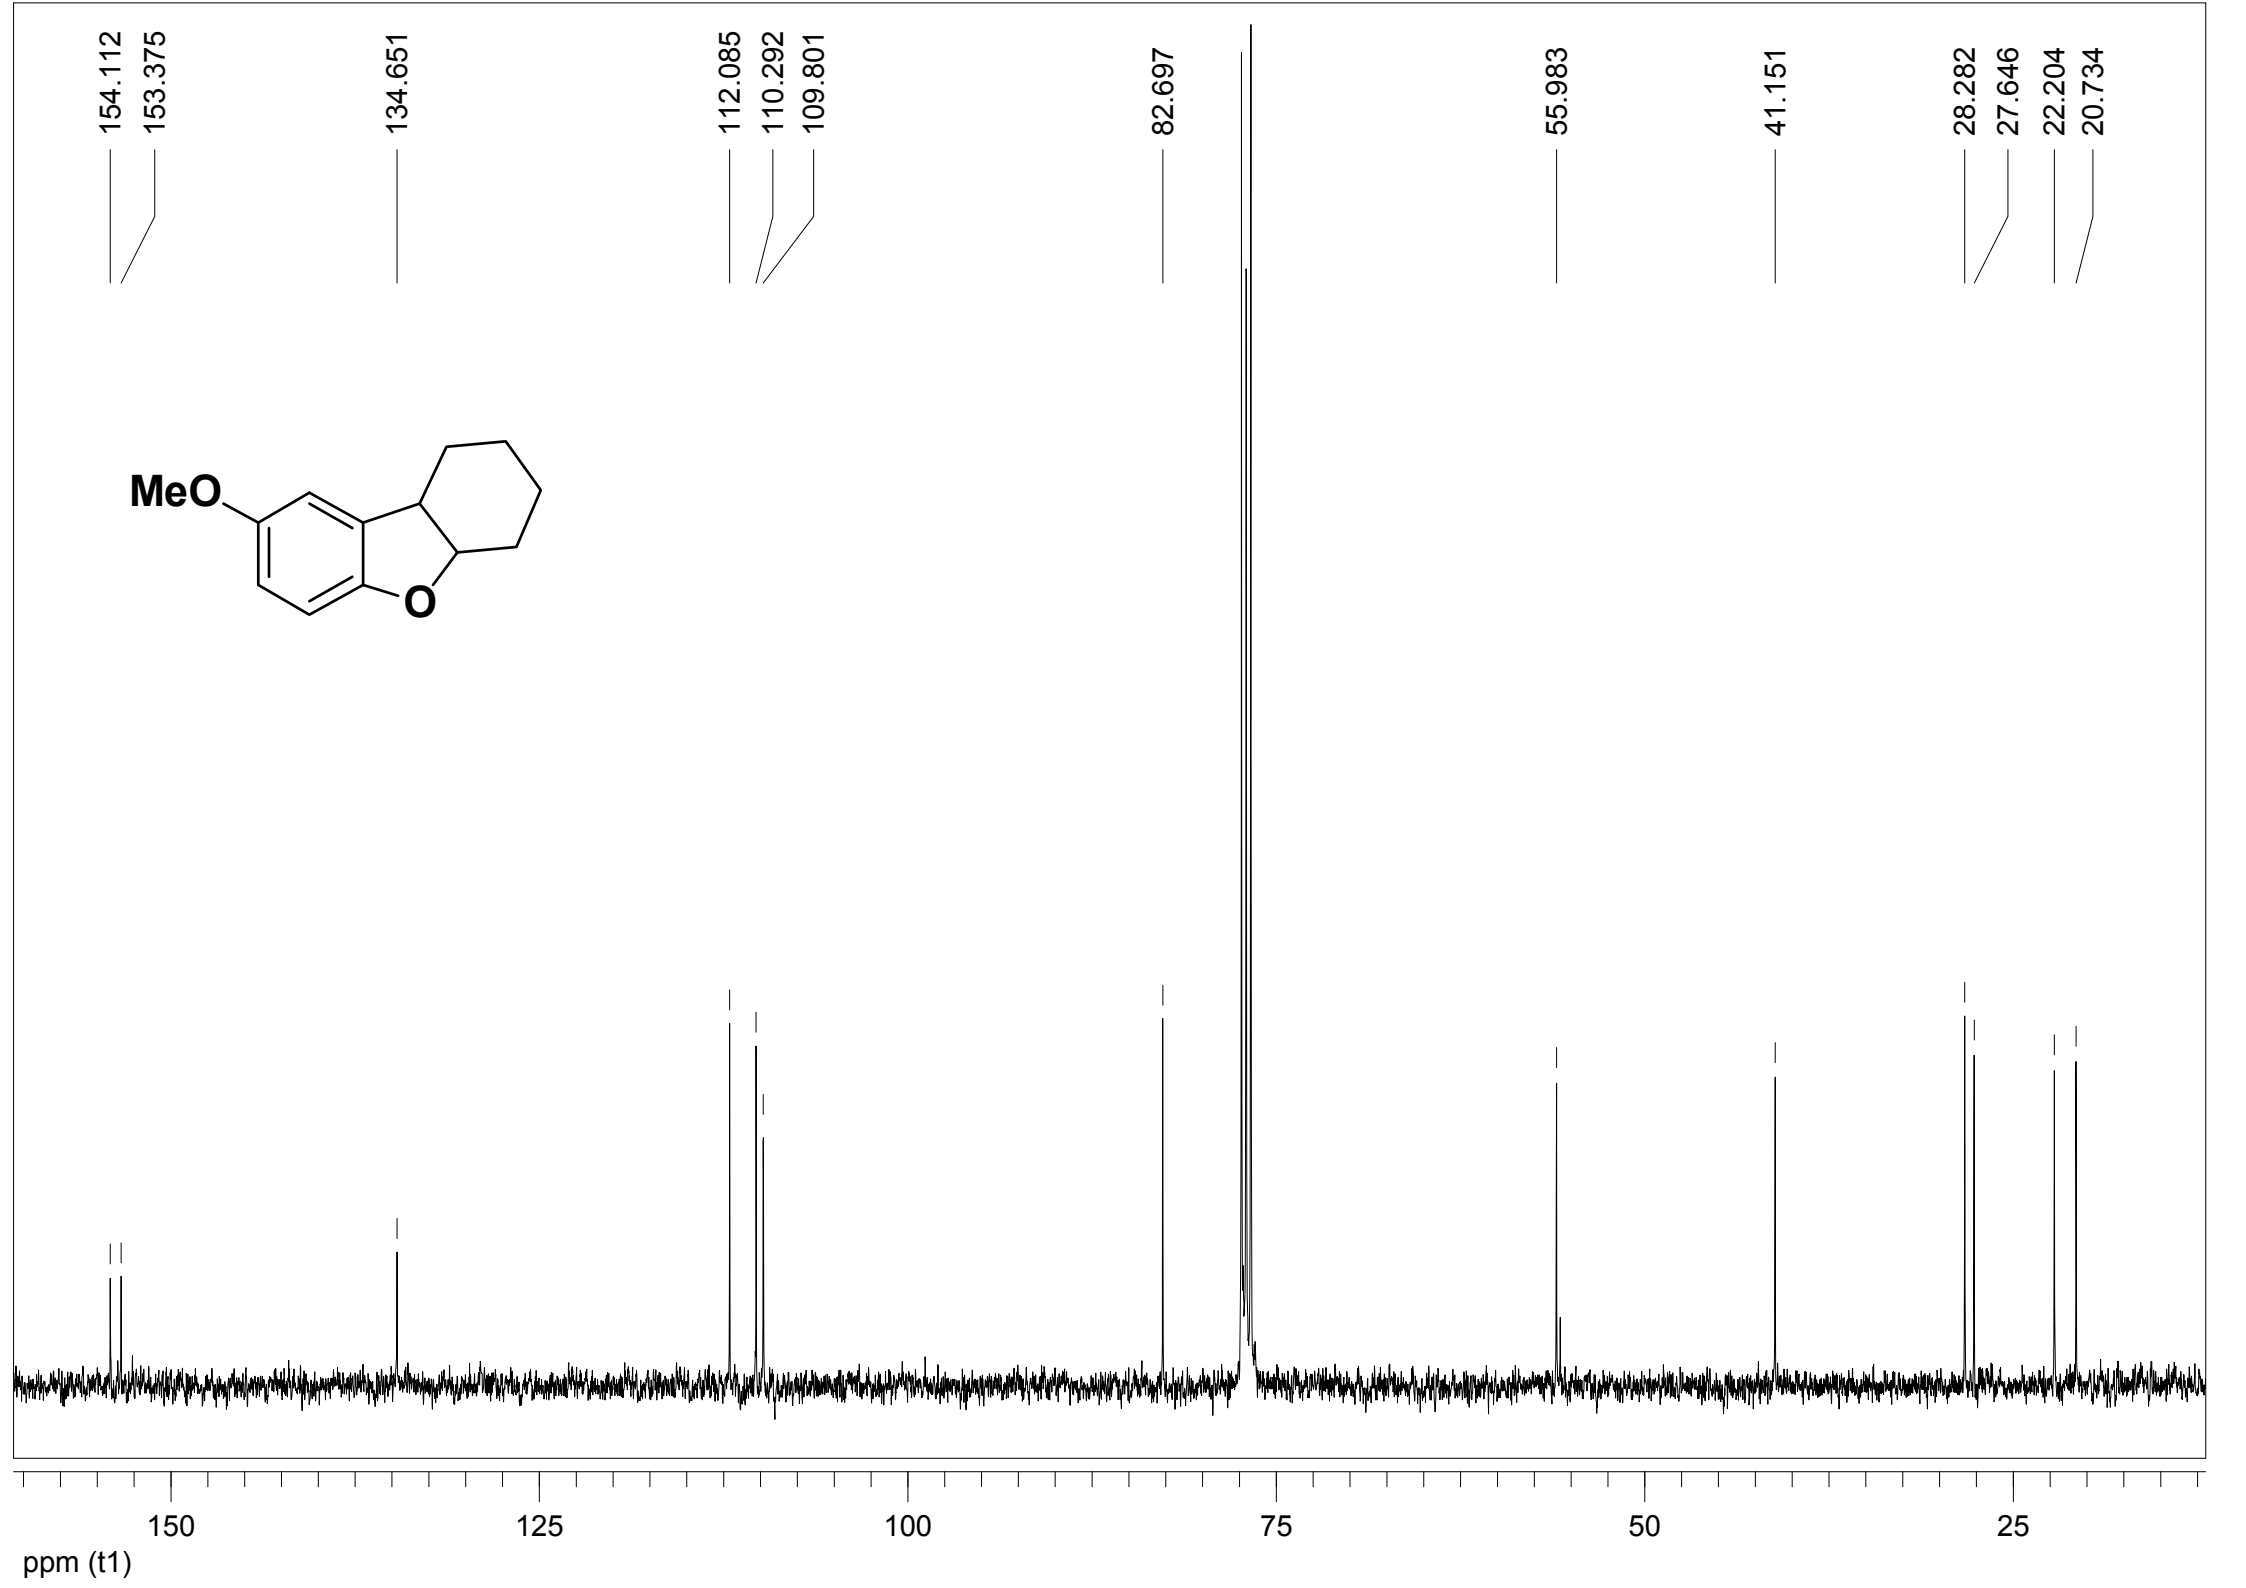

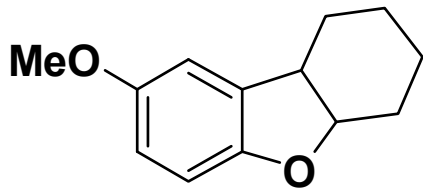

112.084  
110.291  
109.807

82.697

55.981

41.150

28.280

27.647

22.202

20.733

ppm (t1)

100

75

50

25



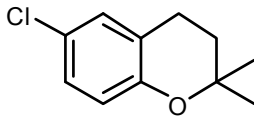

7.039

6.716

6.693

2.745

1.785

1.324

1.99

1.01

1.97

2.24

6.00

7.50  
ppm (t1)

7.00

6.50

6.00

5.50

5.00

4.50

4.00

3.50

3.00

2.50

2.00

1.50

1.00

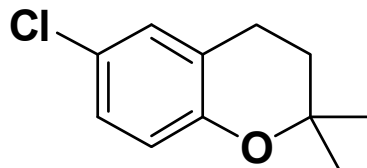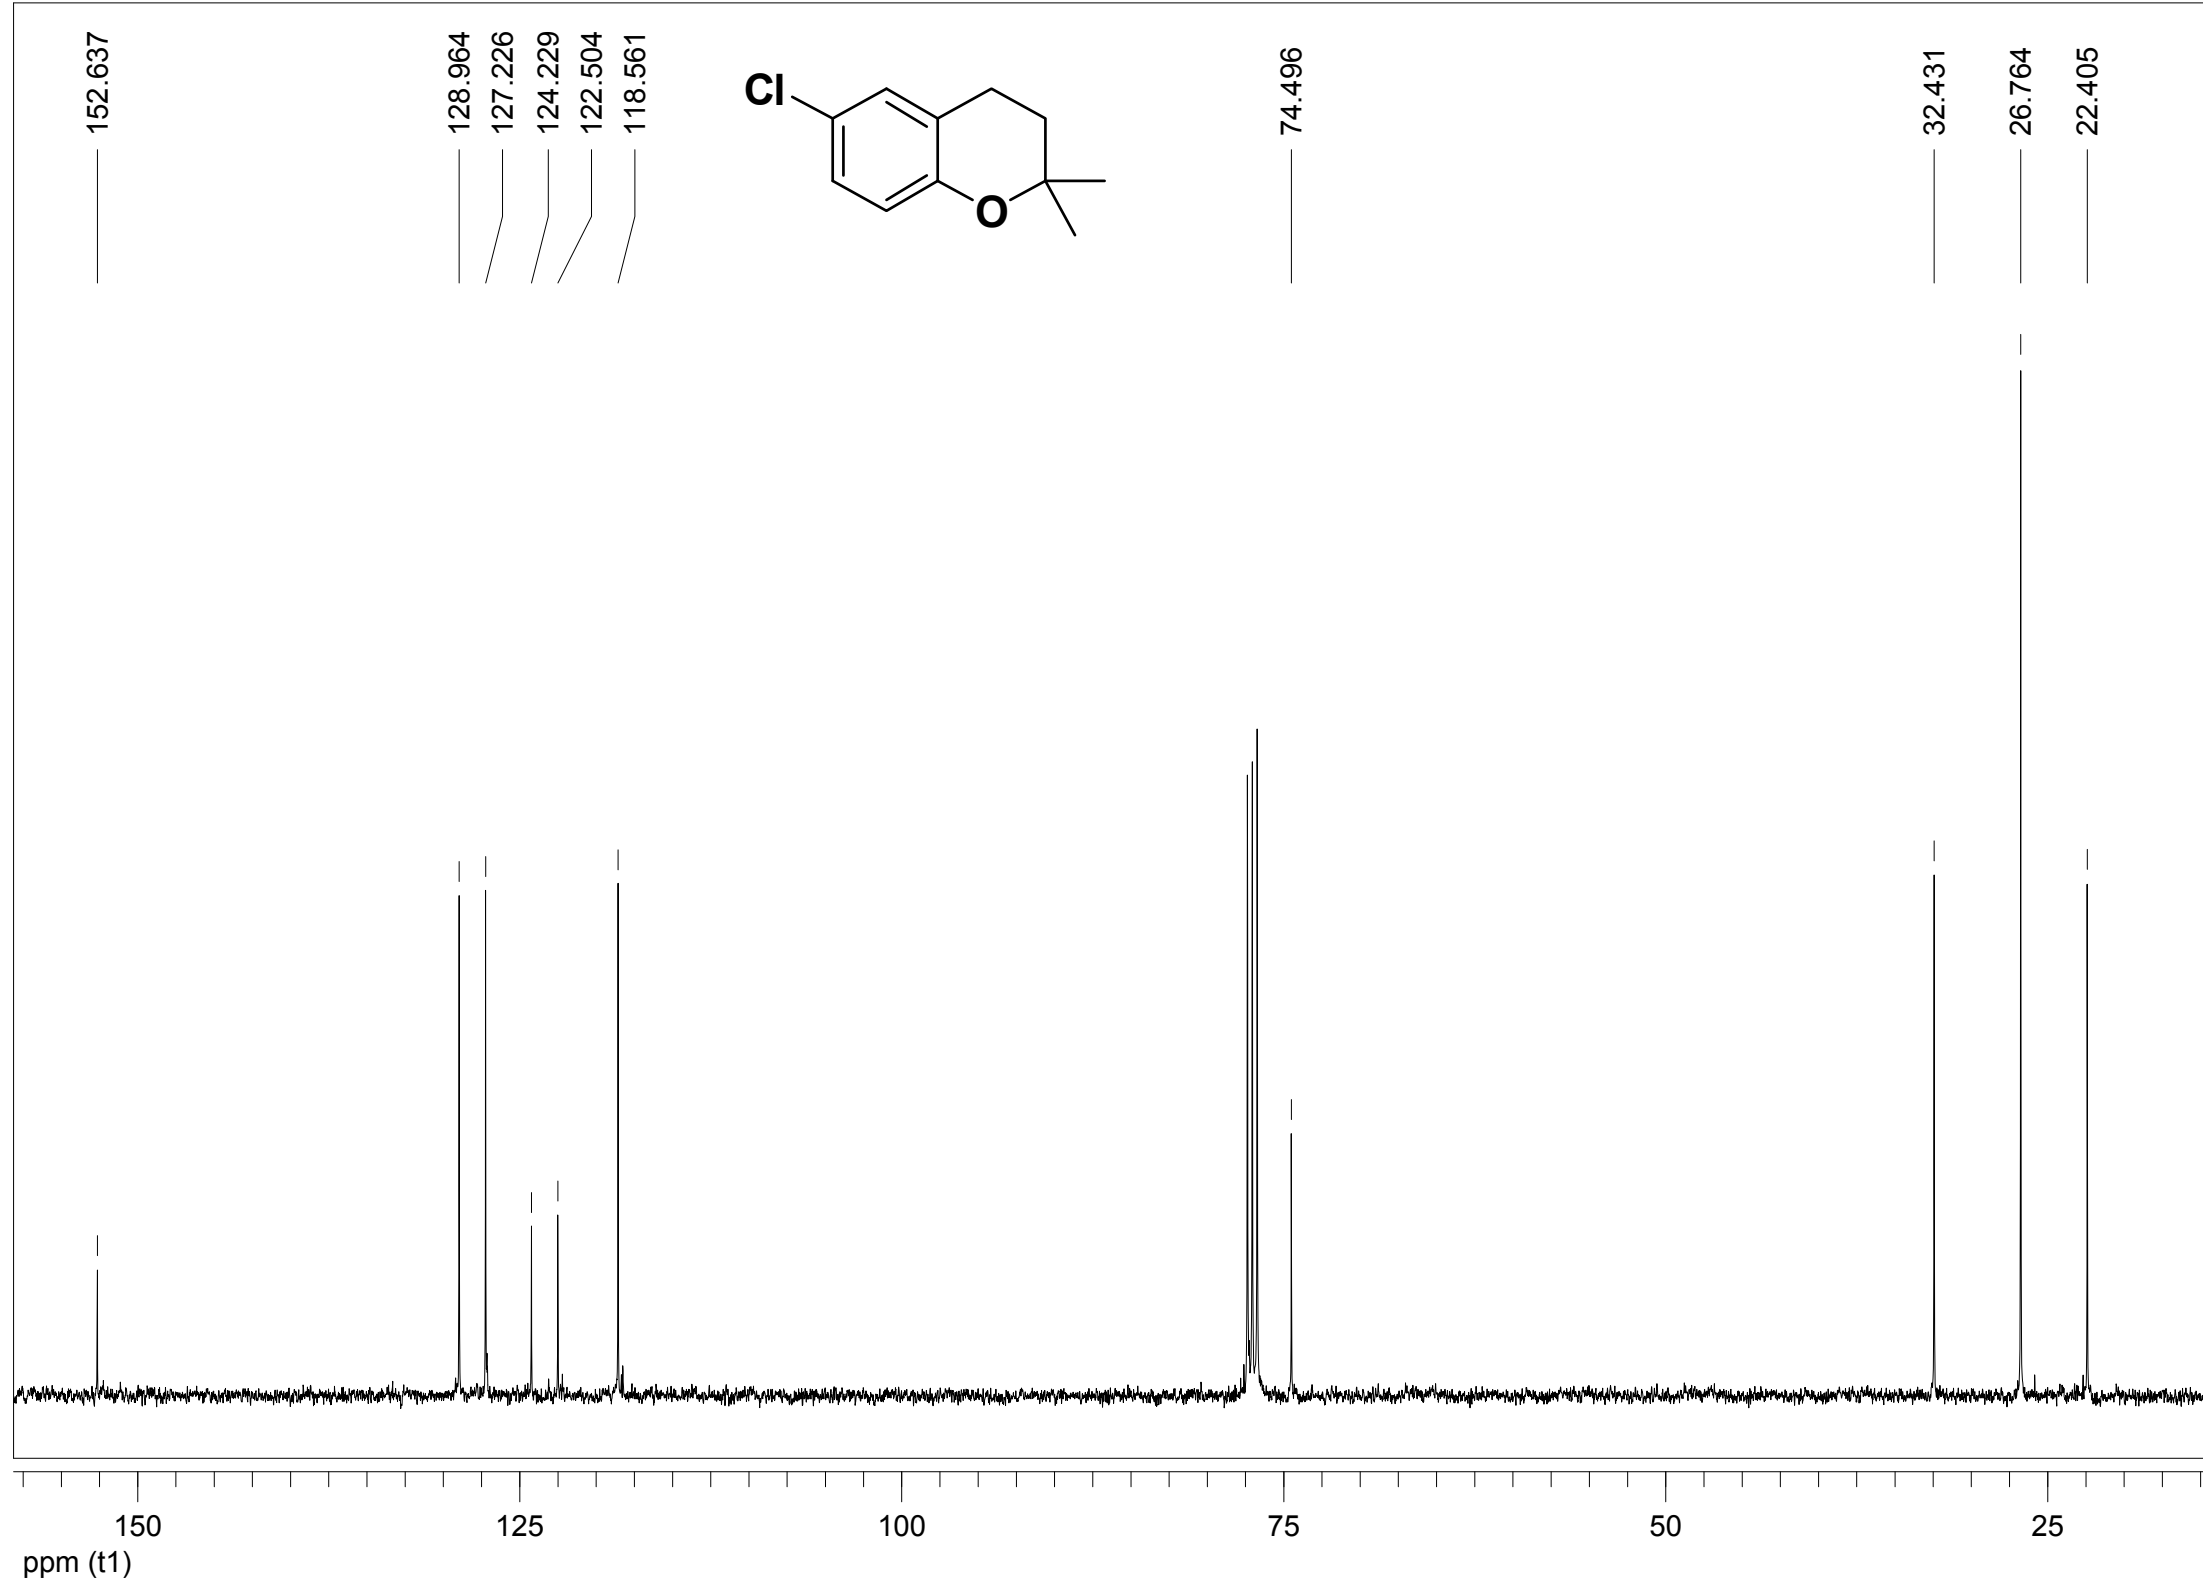

128.965

127.226

118.561

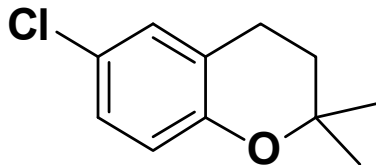

32.429

26.765

22.403

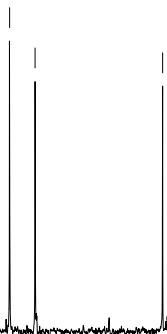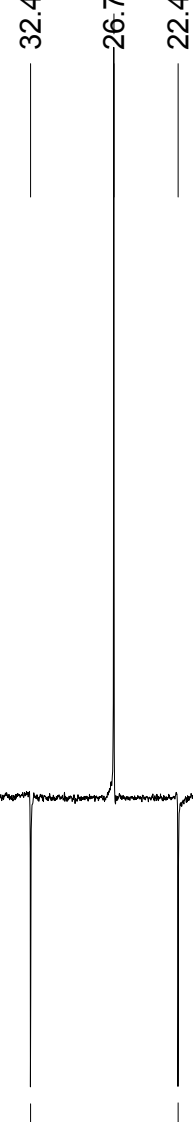

125

100

75

50

25

ppm (t1)

7.098  
6.851  
6.829  
6.808

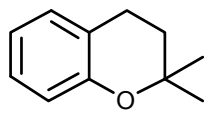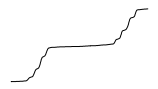

3.63

2.802

1.92

1.837

1.93

1.372

6.00

7.50 7.00 6.50 6.00 5.50 5.00 4.50 4.00 3.50 3.00 2.50 2.00 1.50 1.00  
ppm (t1)

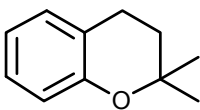

154.031

129.489

127.290

120.950

119.644

117.281

74.119

32.848

26.938

22.501

ppm (t1)

150

125

100

75

50

25

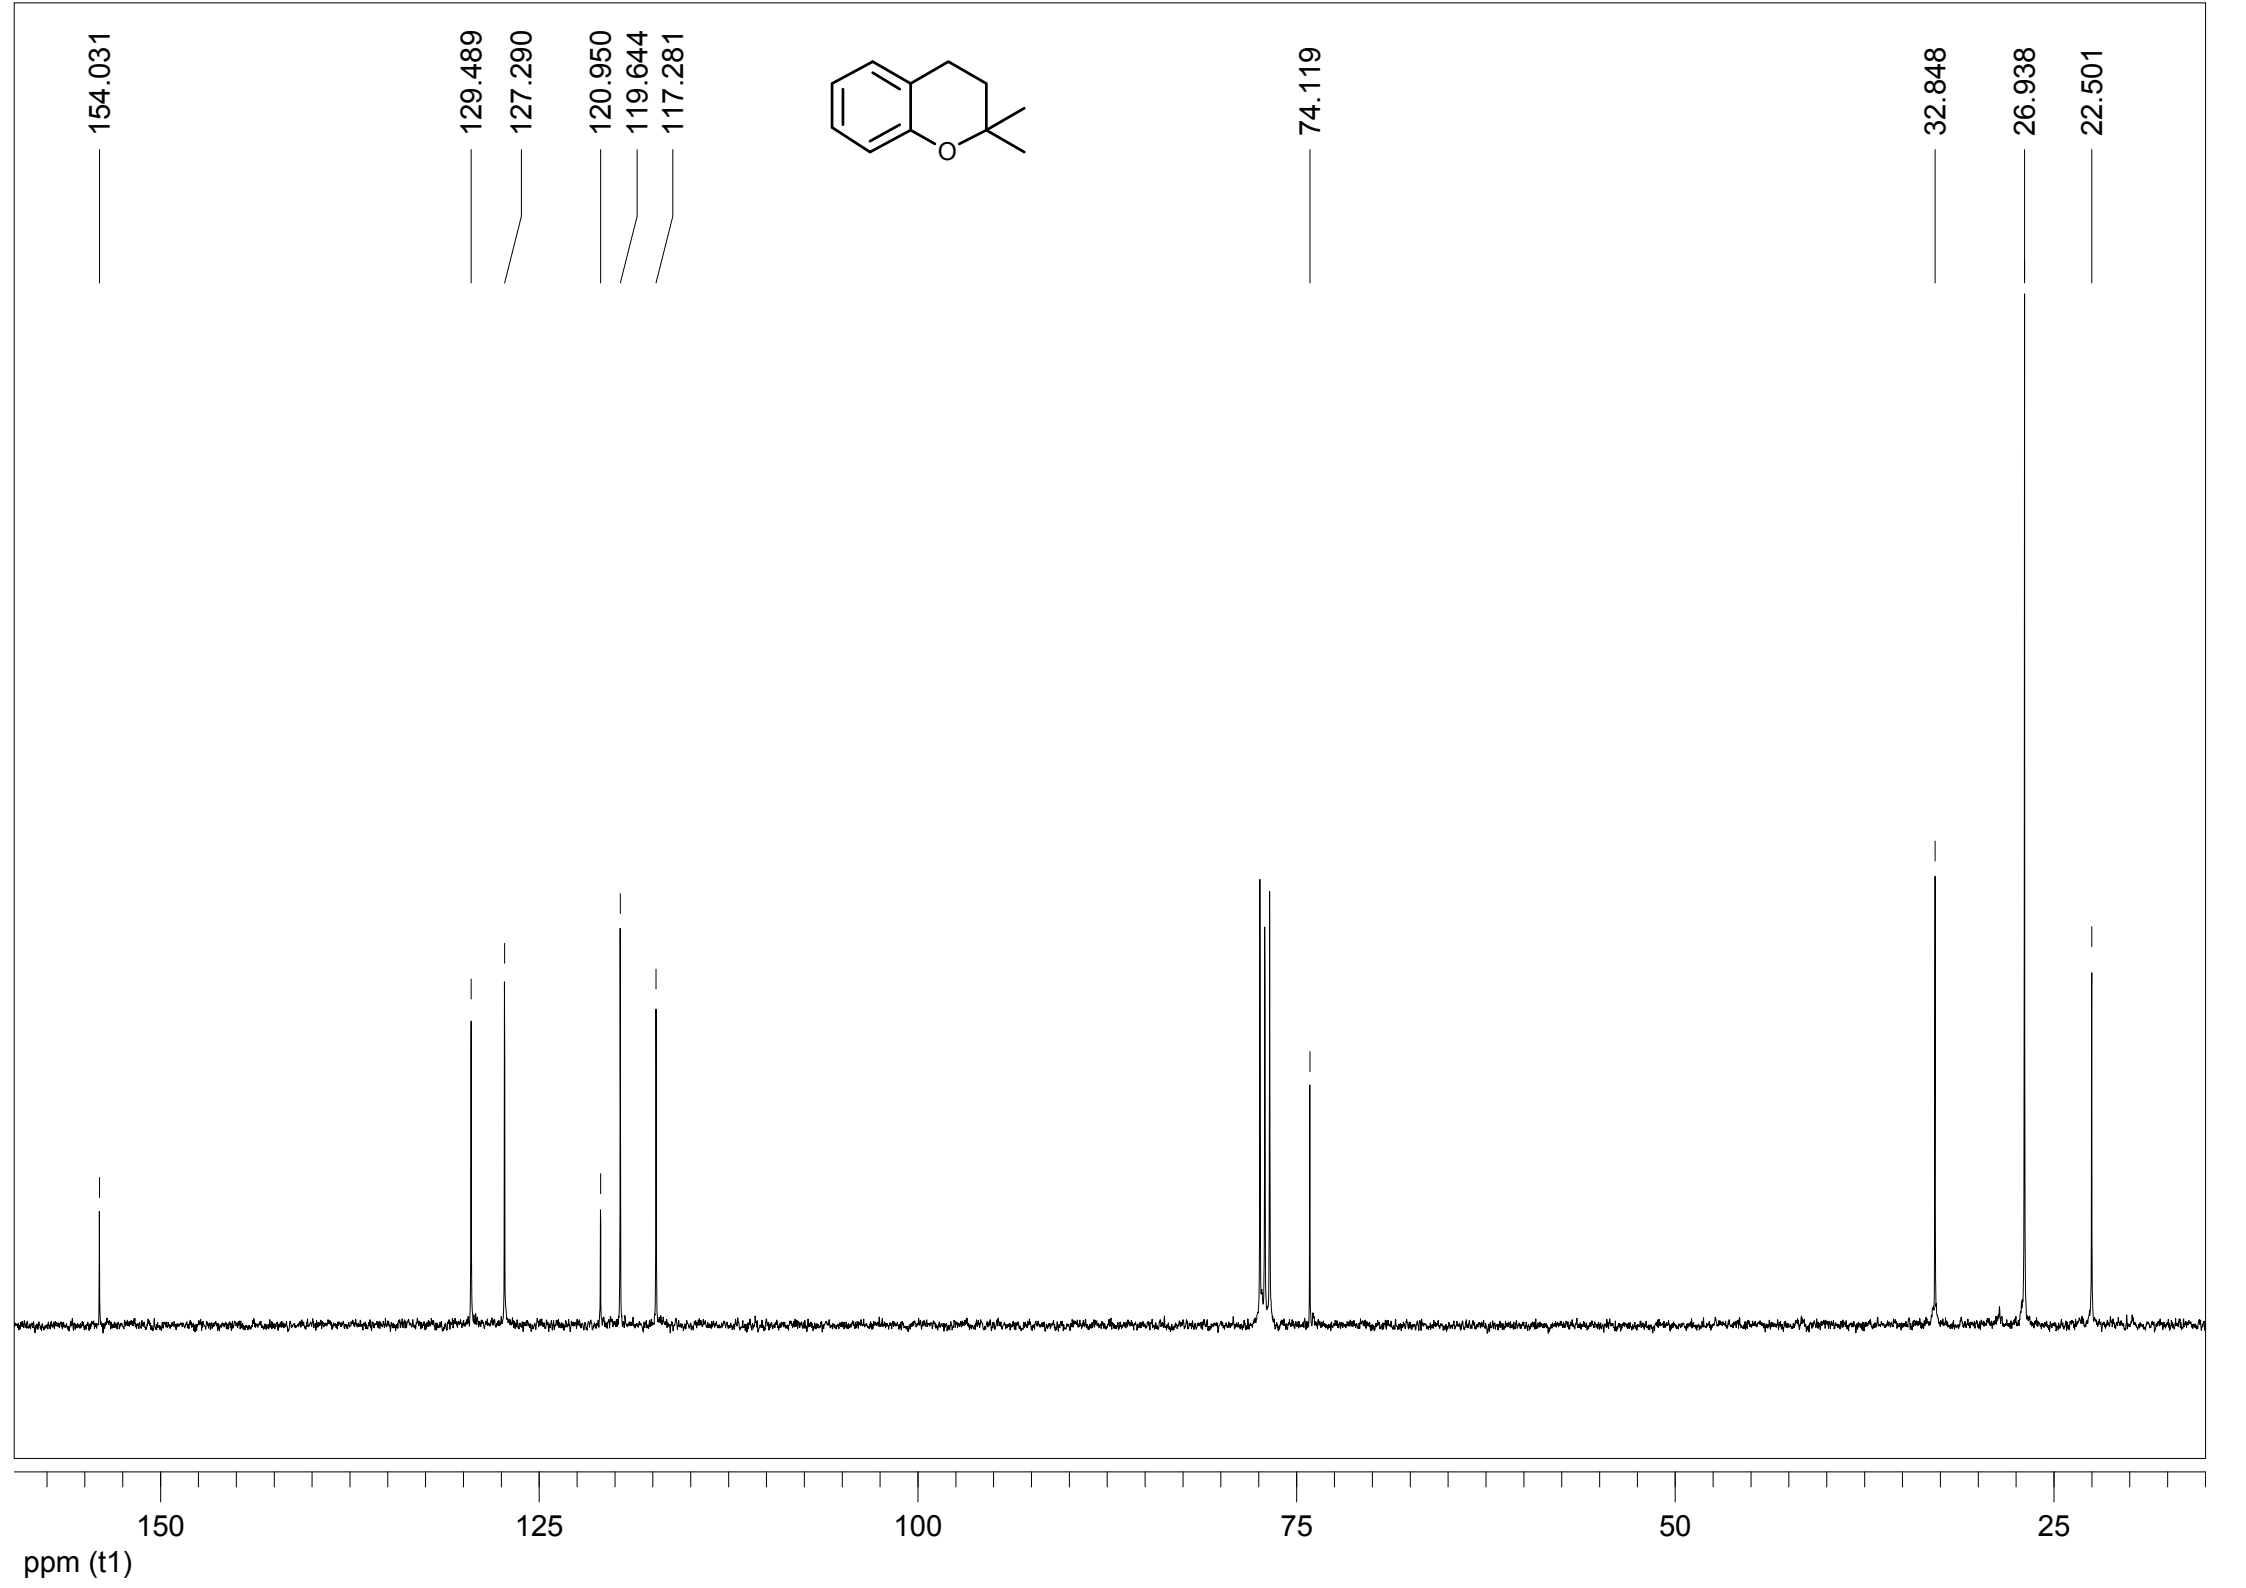

129.498  
127.292

119.646  
117.280

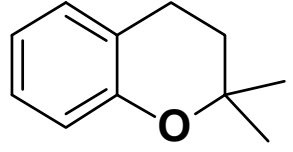

32.846

26.939

22.496

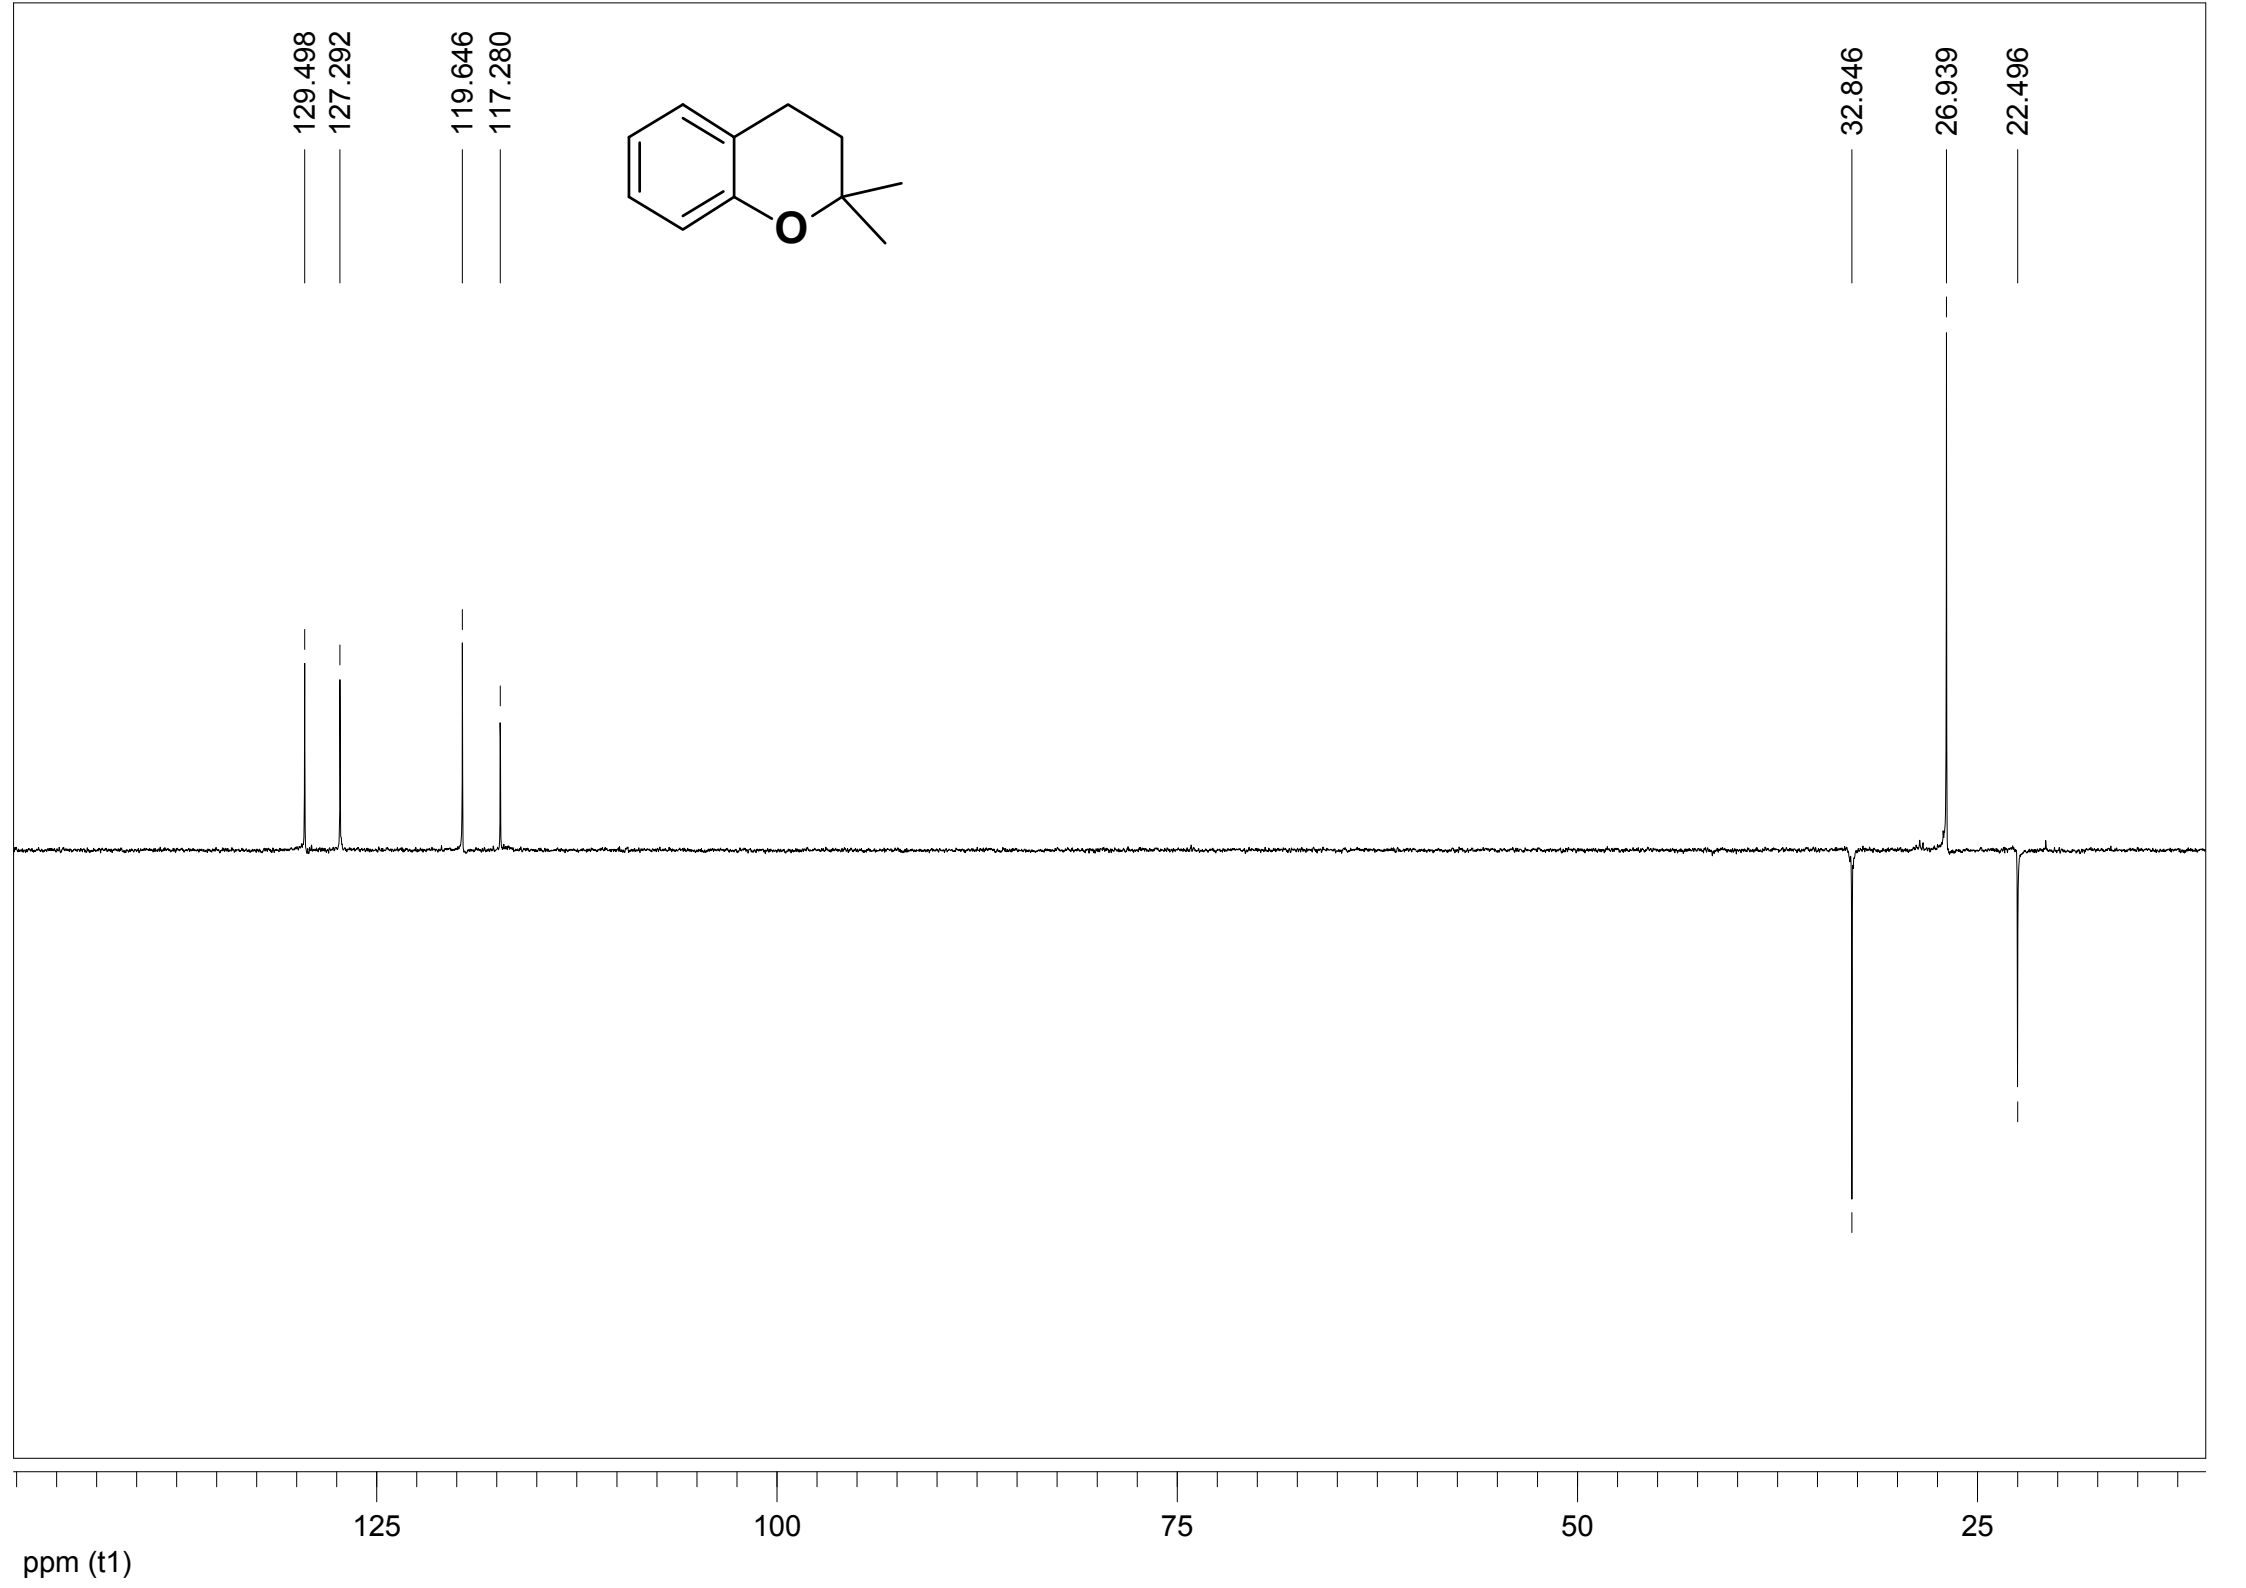

ppm (t1)

125

100

75

50

25

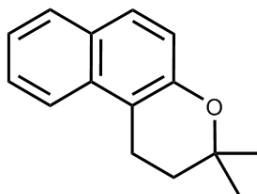

8.020  
7.999  
7.973  
7.952  
7.842  
7.820  
7.720  
7.700  
7.682  
7.571  
7.551  
7.531  
7.321  
7.299

3.172

2.095

1.592

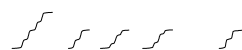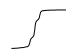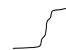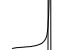

1.79  
0.92  
0.91  
0.92  
0.90

1.92

2.05

6.00

8.50 8.00 7.50 7.00 6.50 6.00 5.50 5.00 4.50 4.00 3.50 3.00 2.50 2.00 1.50  
ppm (t1)

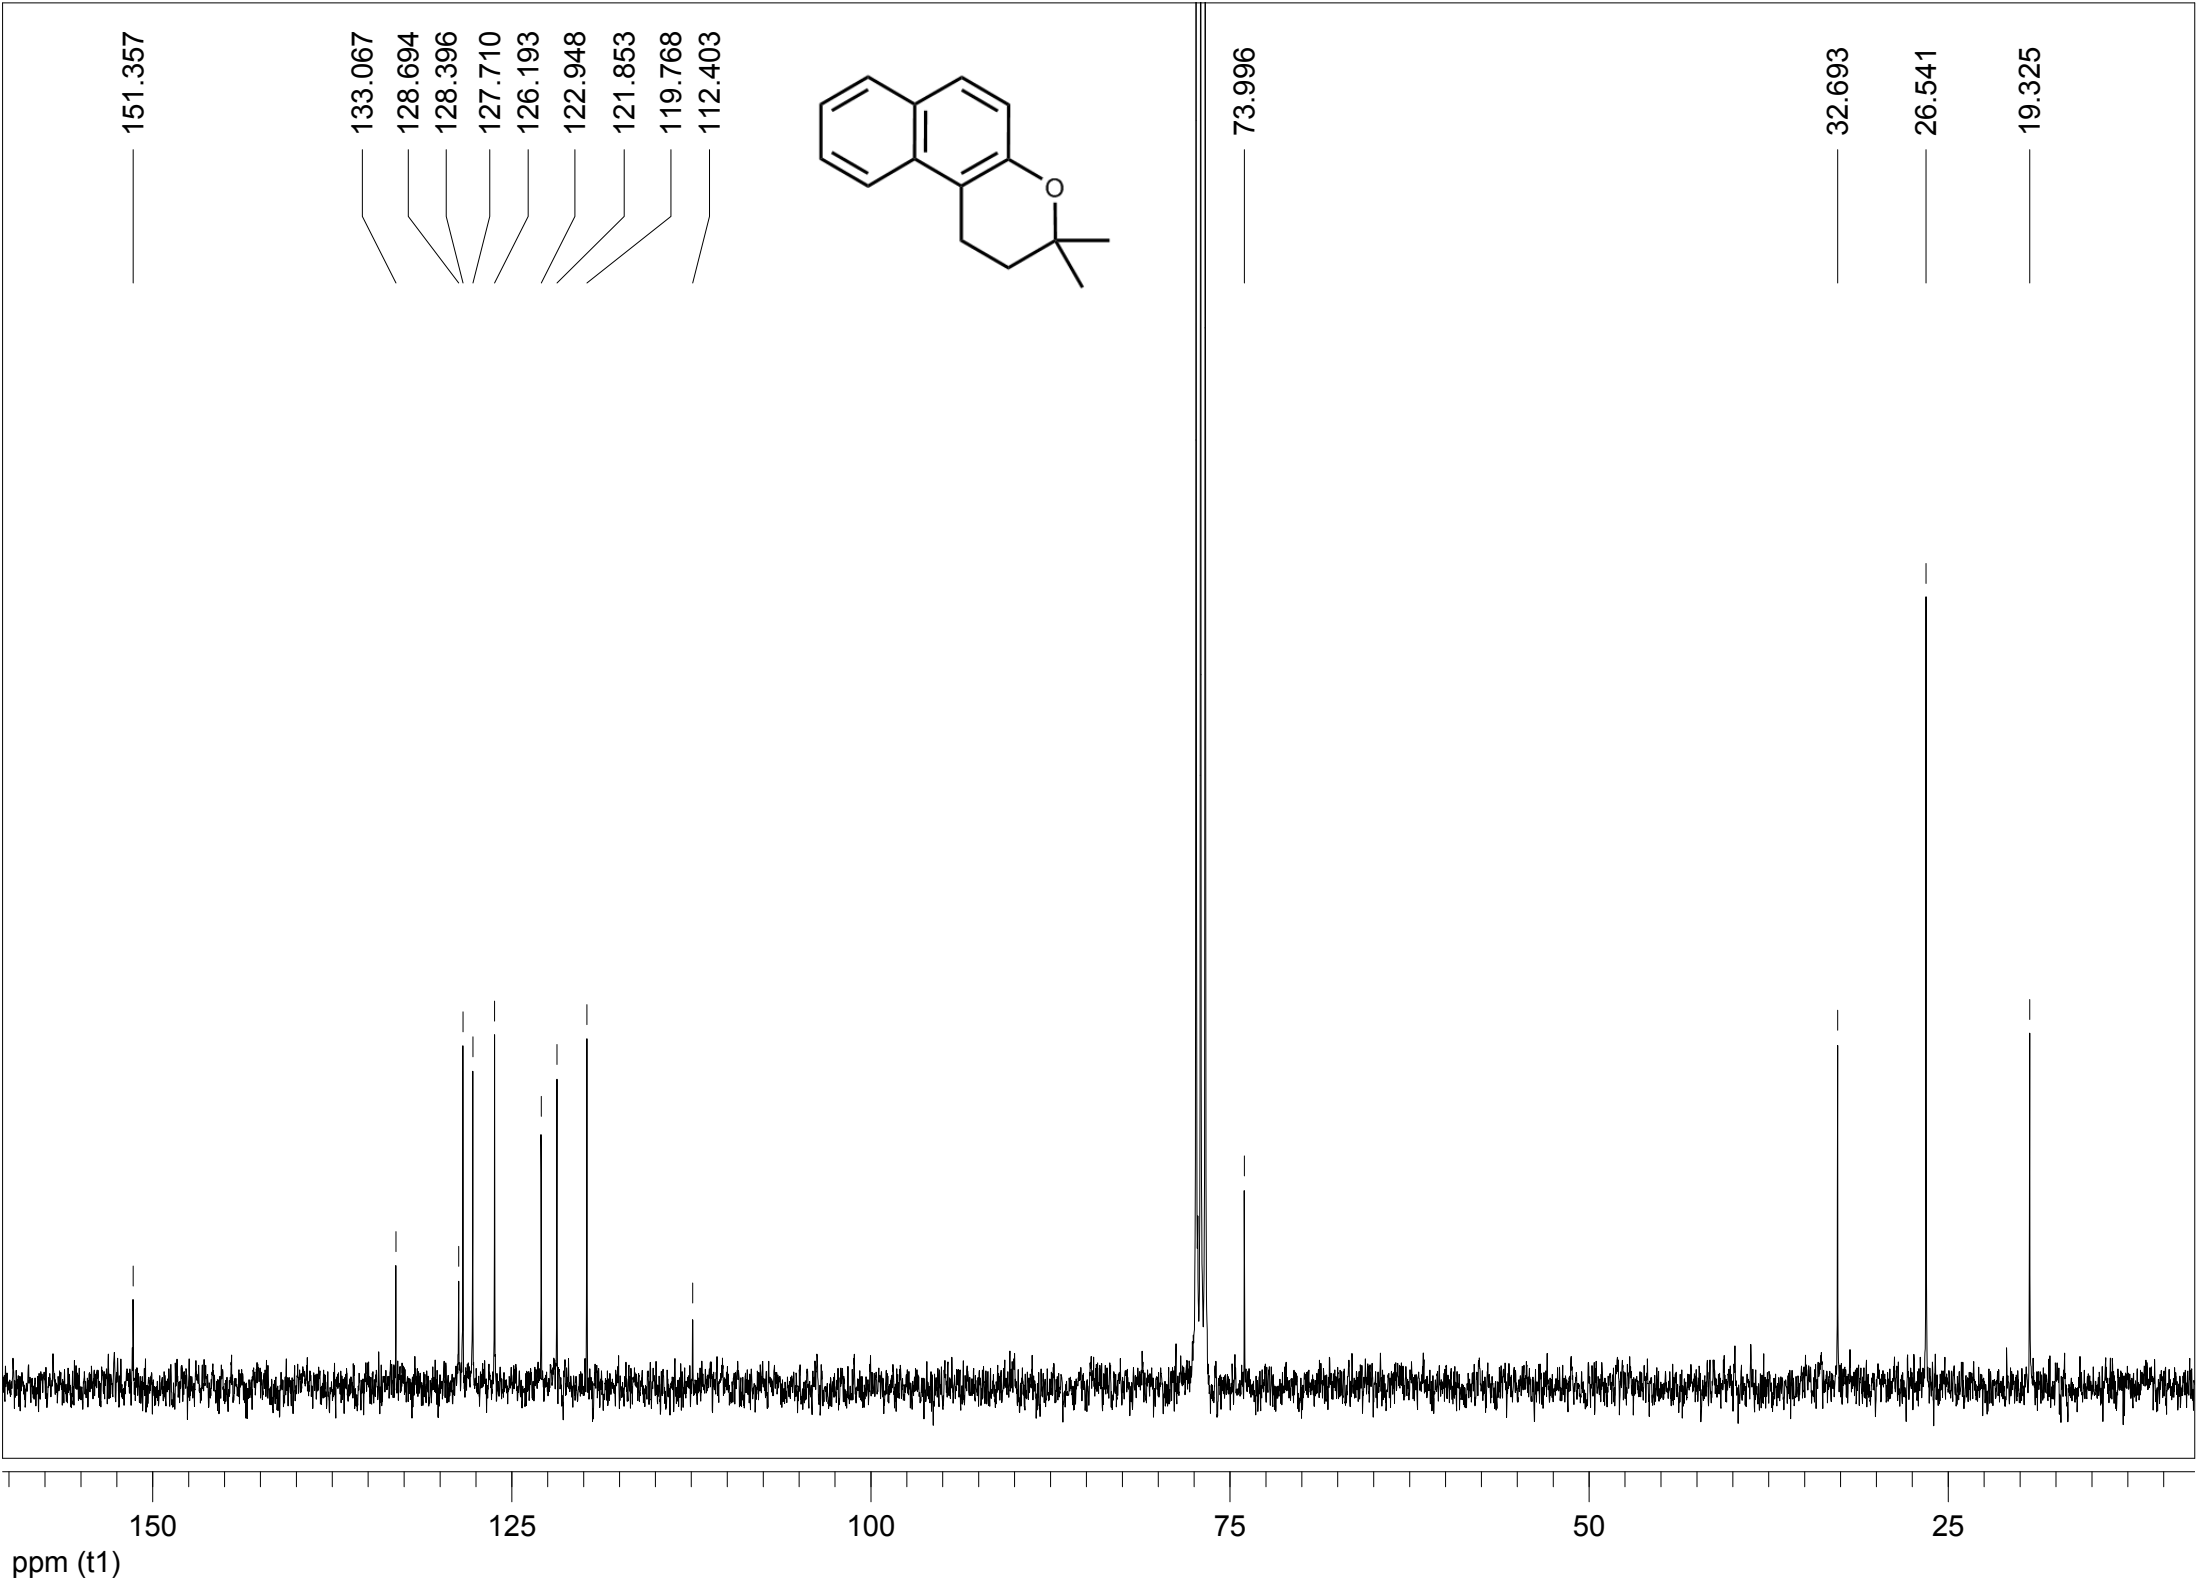

151.357

133.067

128.694

128.396

127.710

126.193

122.948

121.853

119.768

112.403

73.996

32.693

26.541

19.325

ppm (t1)

150

125

100

75

50

25



128.395  
127.709  
126.192  
122.944  
121.852  
119.768

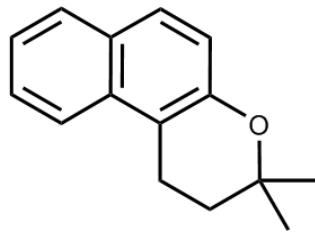

32.694  
26.542  
19.327

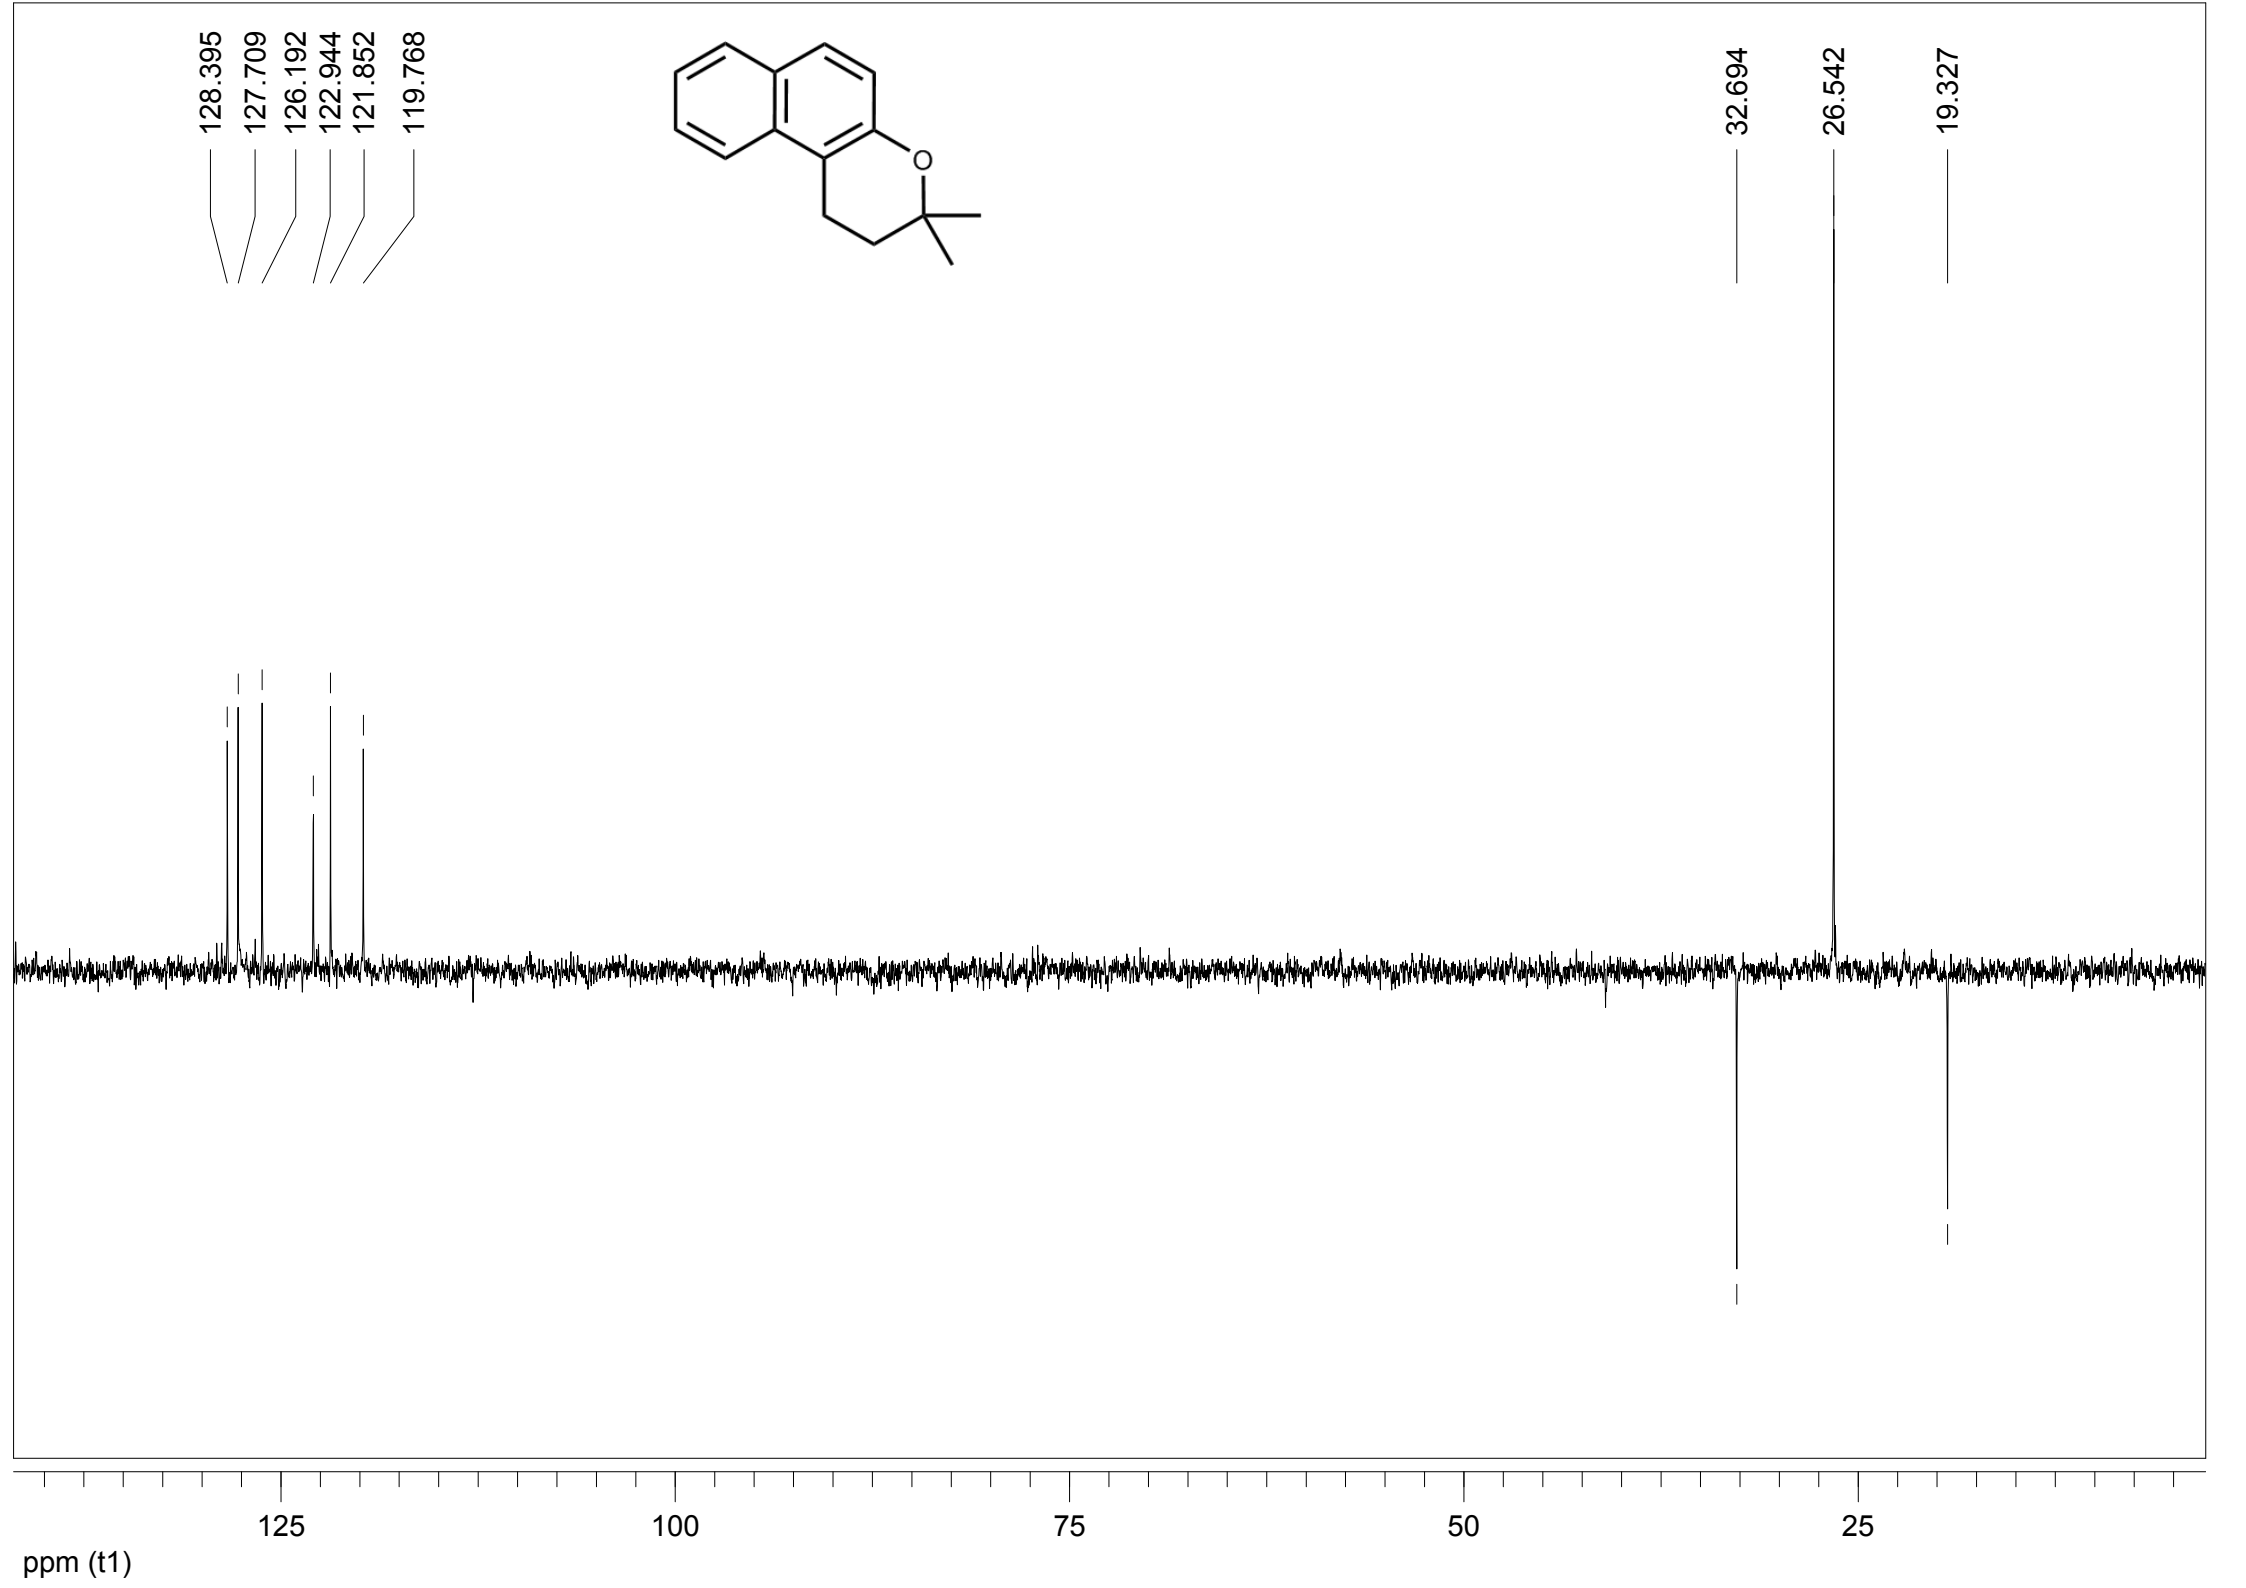

ppm (t1)

125

100

75

50

25

8.027  
8.005  
7.902  
7.882  
7.737  
7.715  
7.570  
7.436  
7.215  
7.193

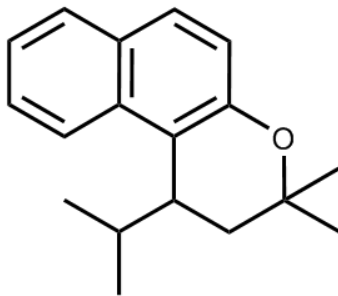

3.623  
3.613

2.813  
2.802  
2.796

2.149  
2.126  
2.083  
2.061

1.660

1.287  
1.221  
1.204

0.635  
0.618

0.33  
0.33  
0.33  
0.33  
0.33  
2.00

0.33  
0.33  
0.69  
1.01  
1.03  
1.00

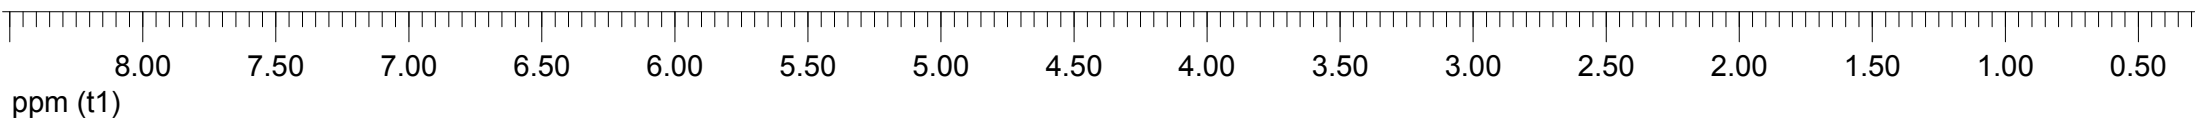

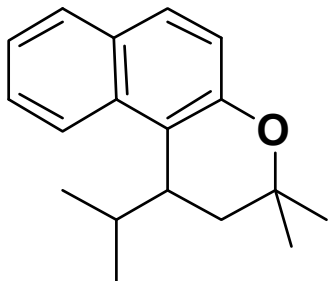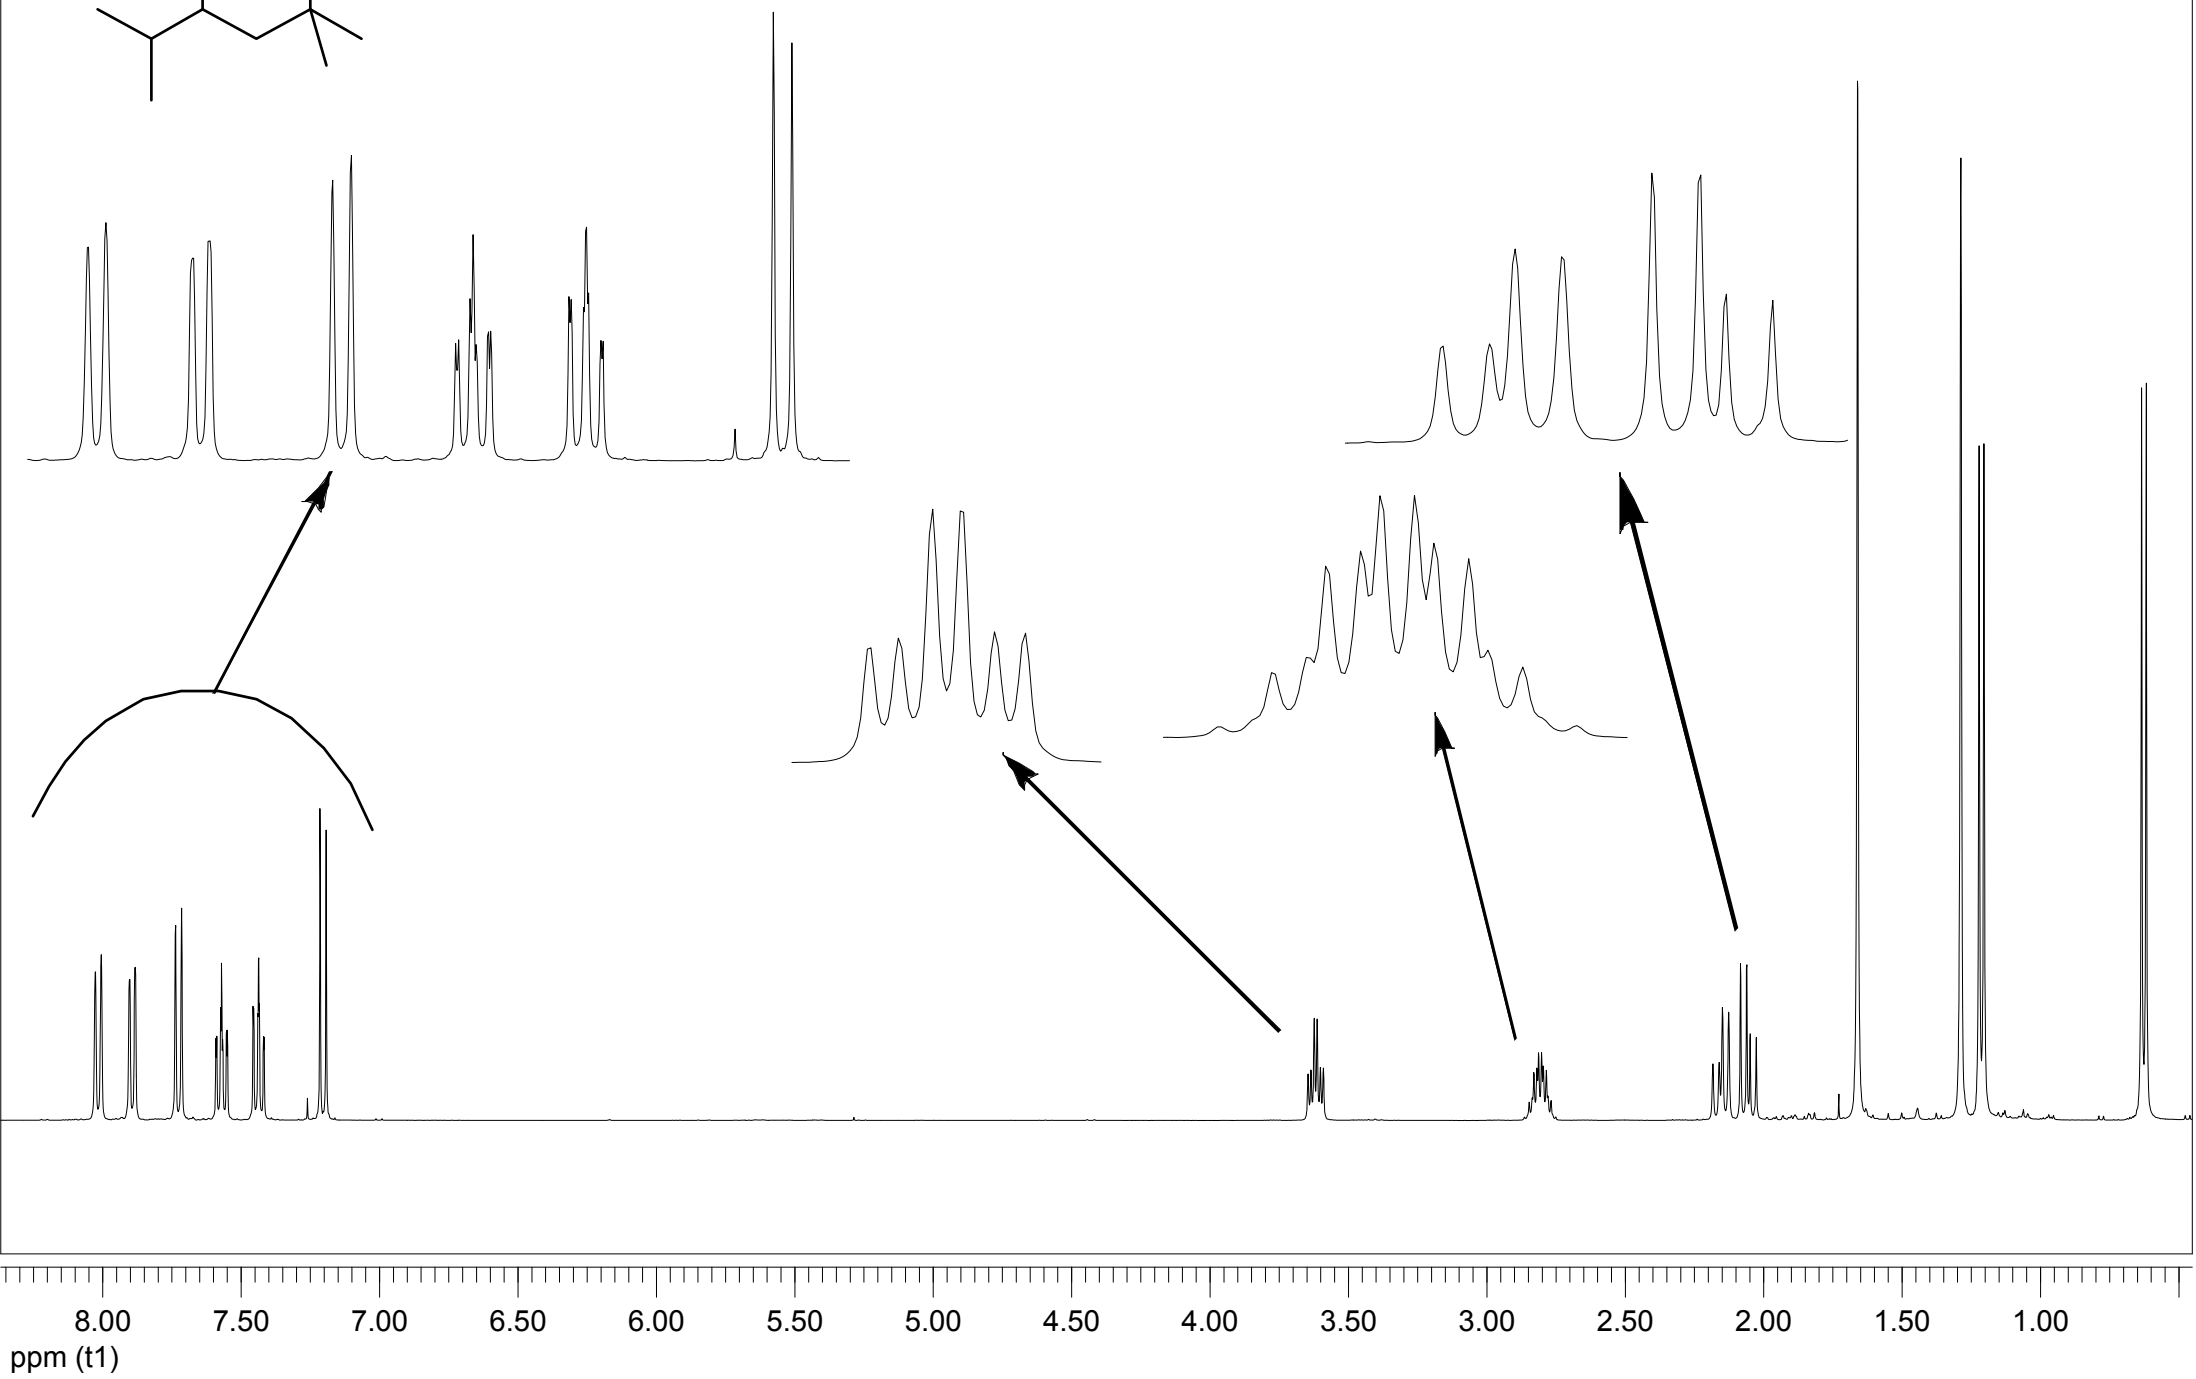

152.738

132.375

130.035

128.897

127.773

125.538

123.557

122.923

120.106

119.303

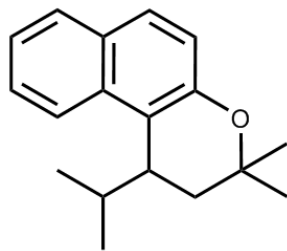

74.844

35.317

34.983

30.769

30.442

23.639

21.160

15.742

ppm (t1)

150

125

100

75

50

25

128.897  
127.774  
125.539  
123.559  
122.925  
120.105

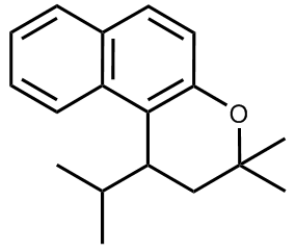

35.310  
34.982  
30.769  
30.438  
23.633  
21.165  
15.741

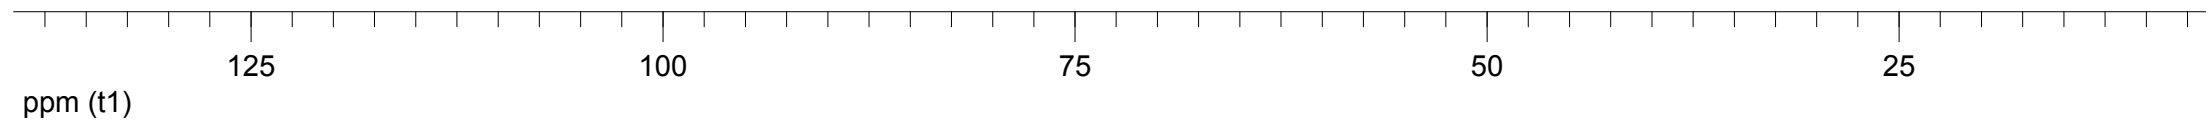

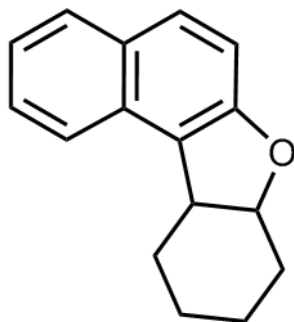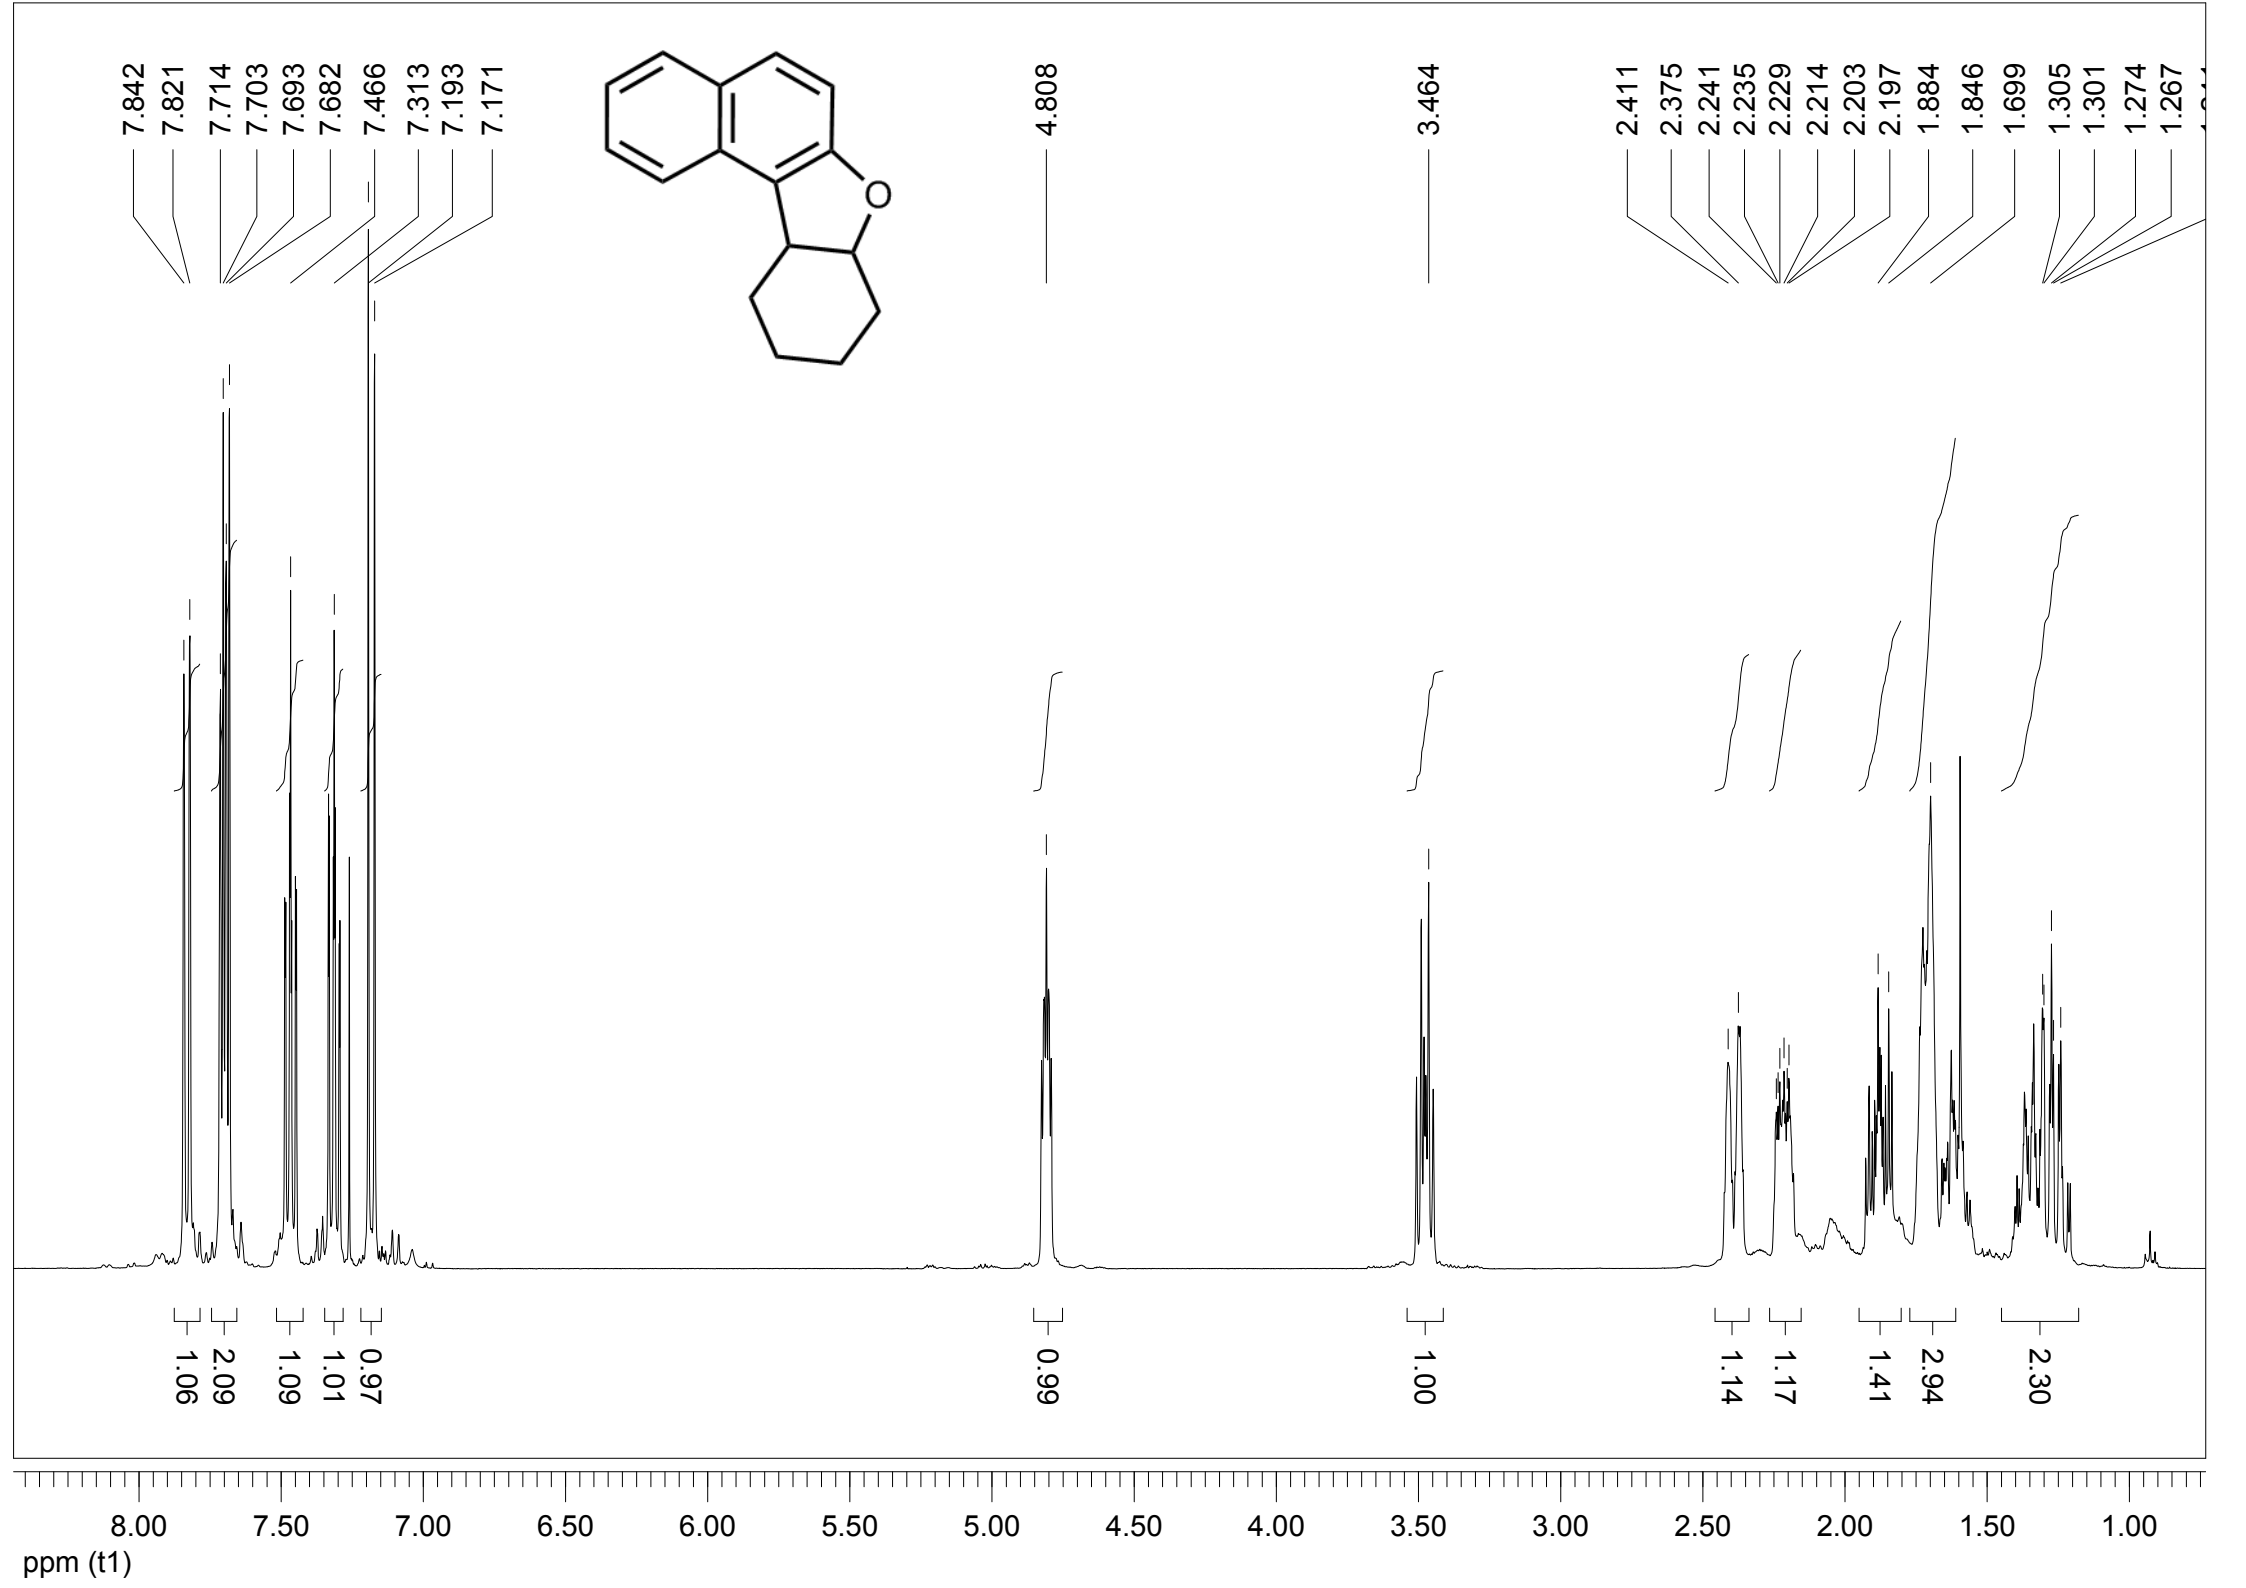

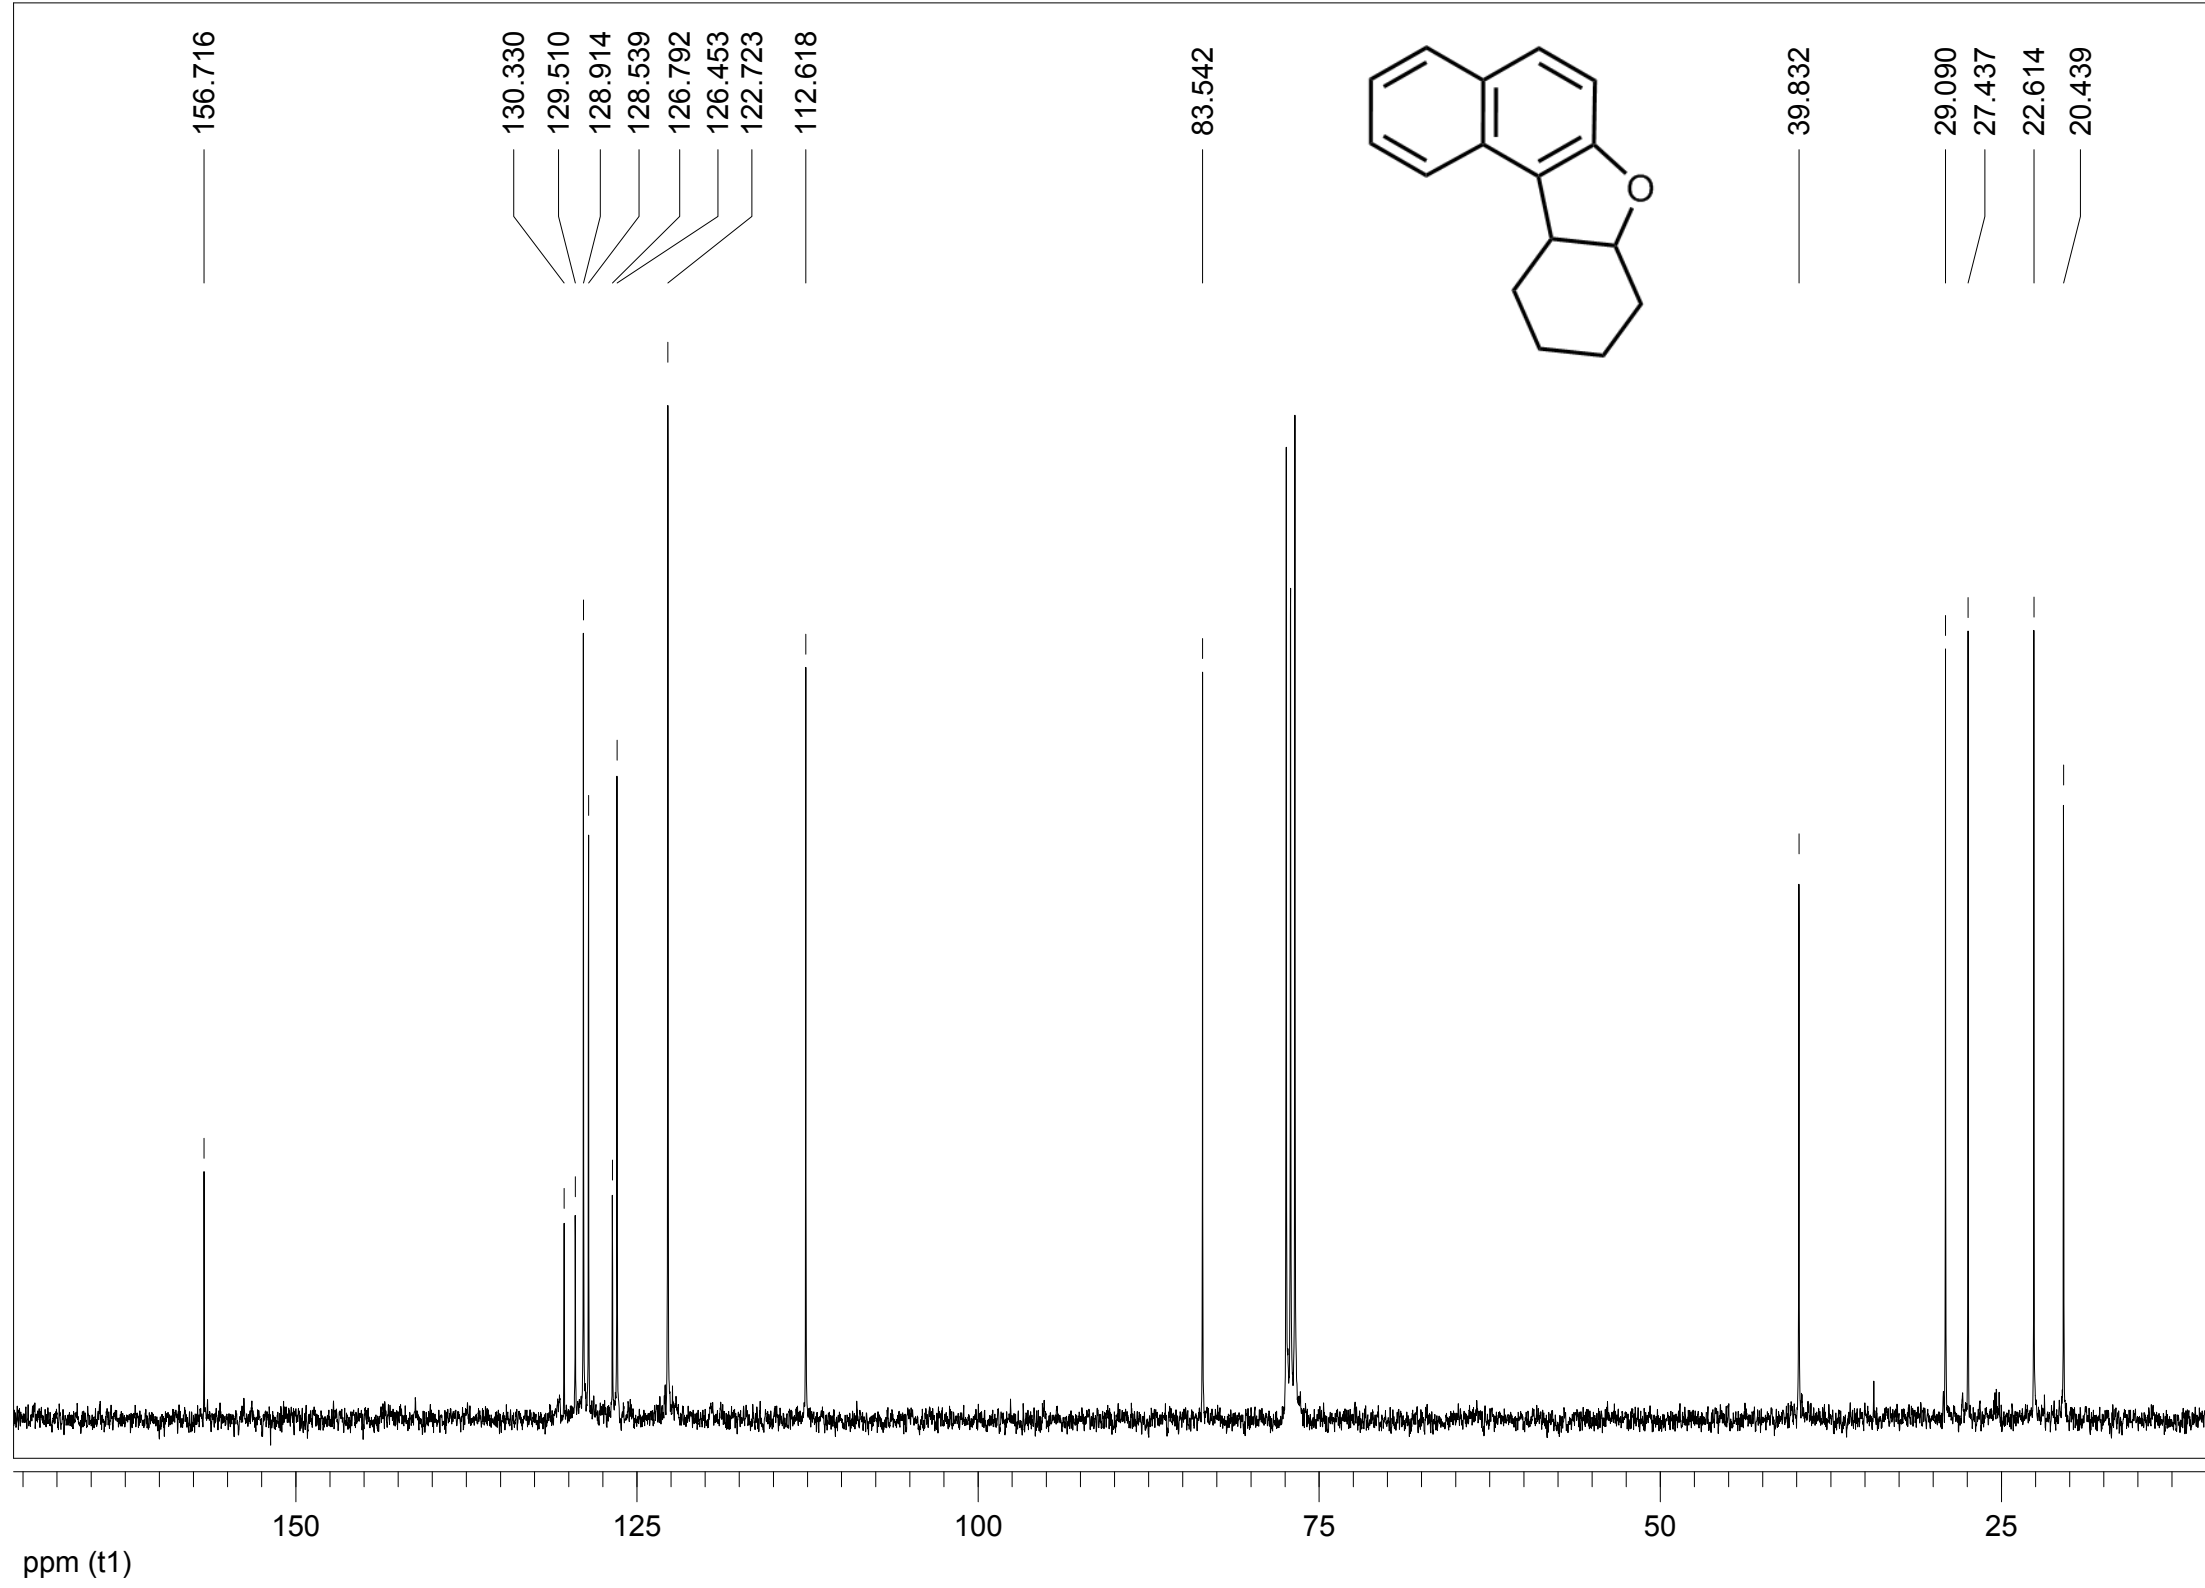

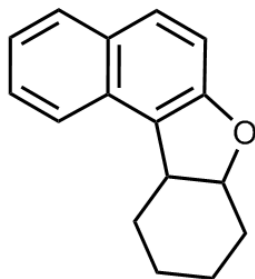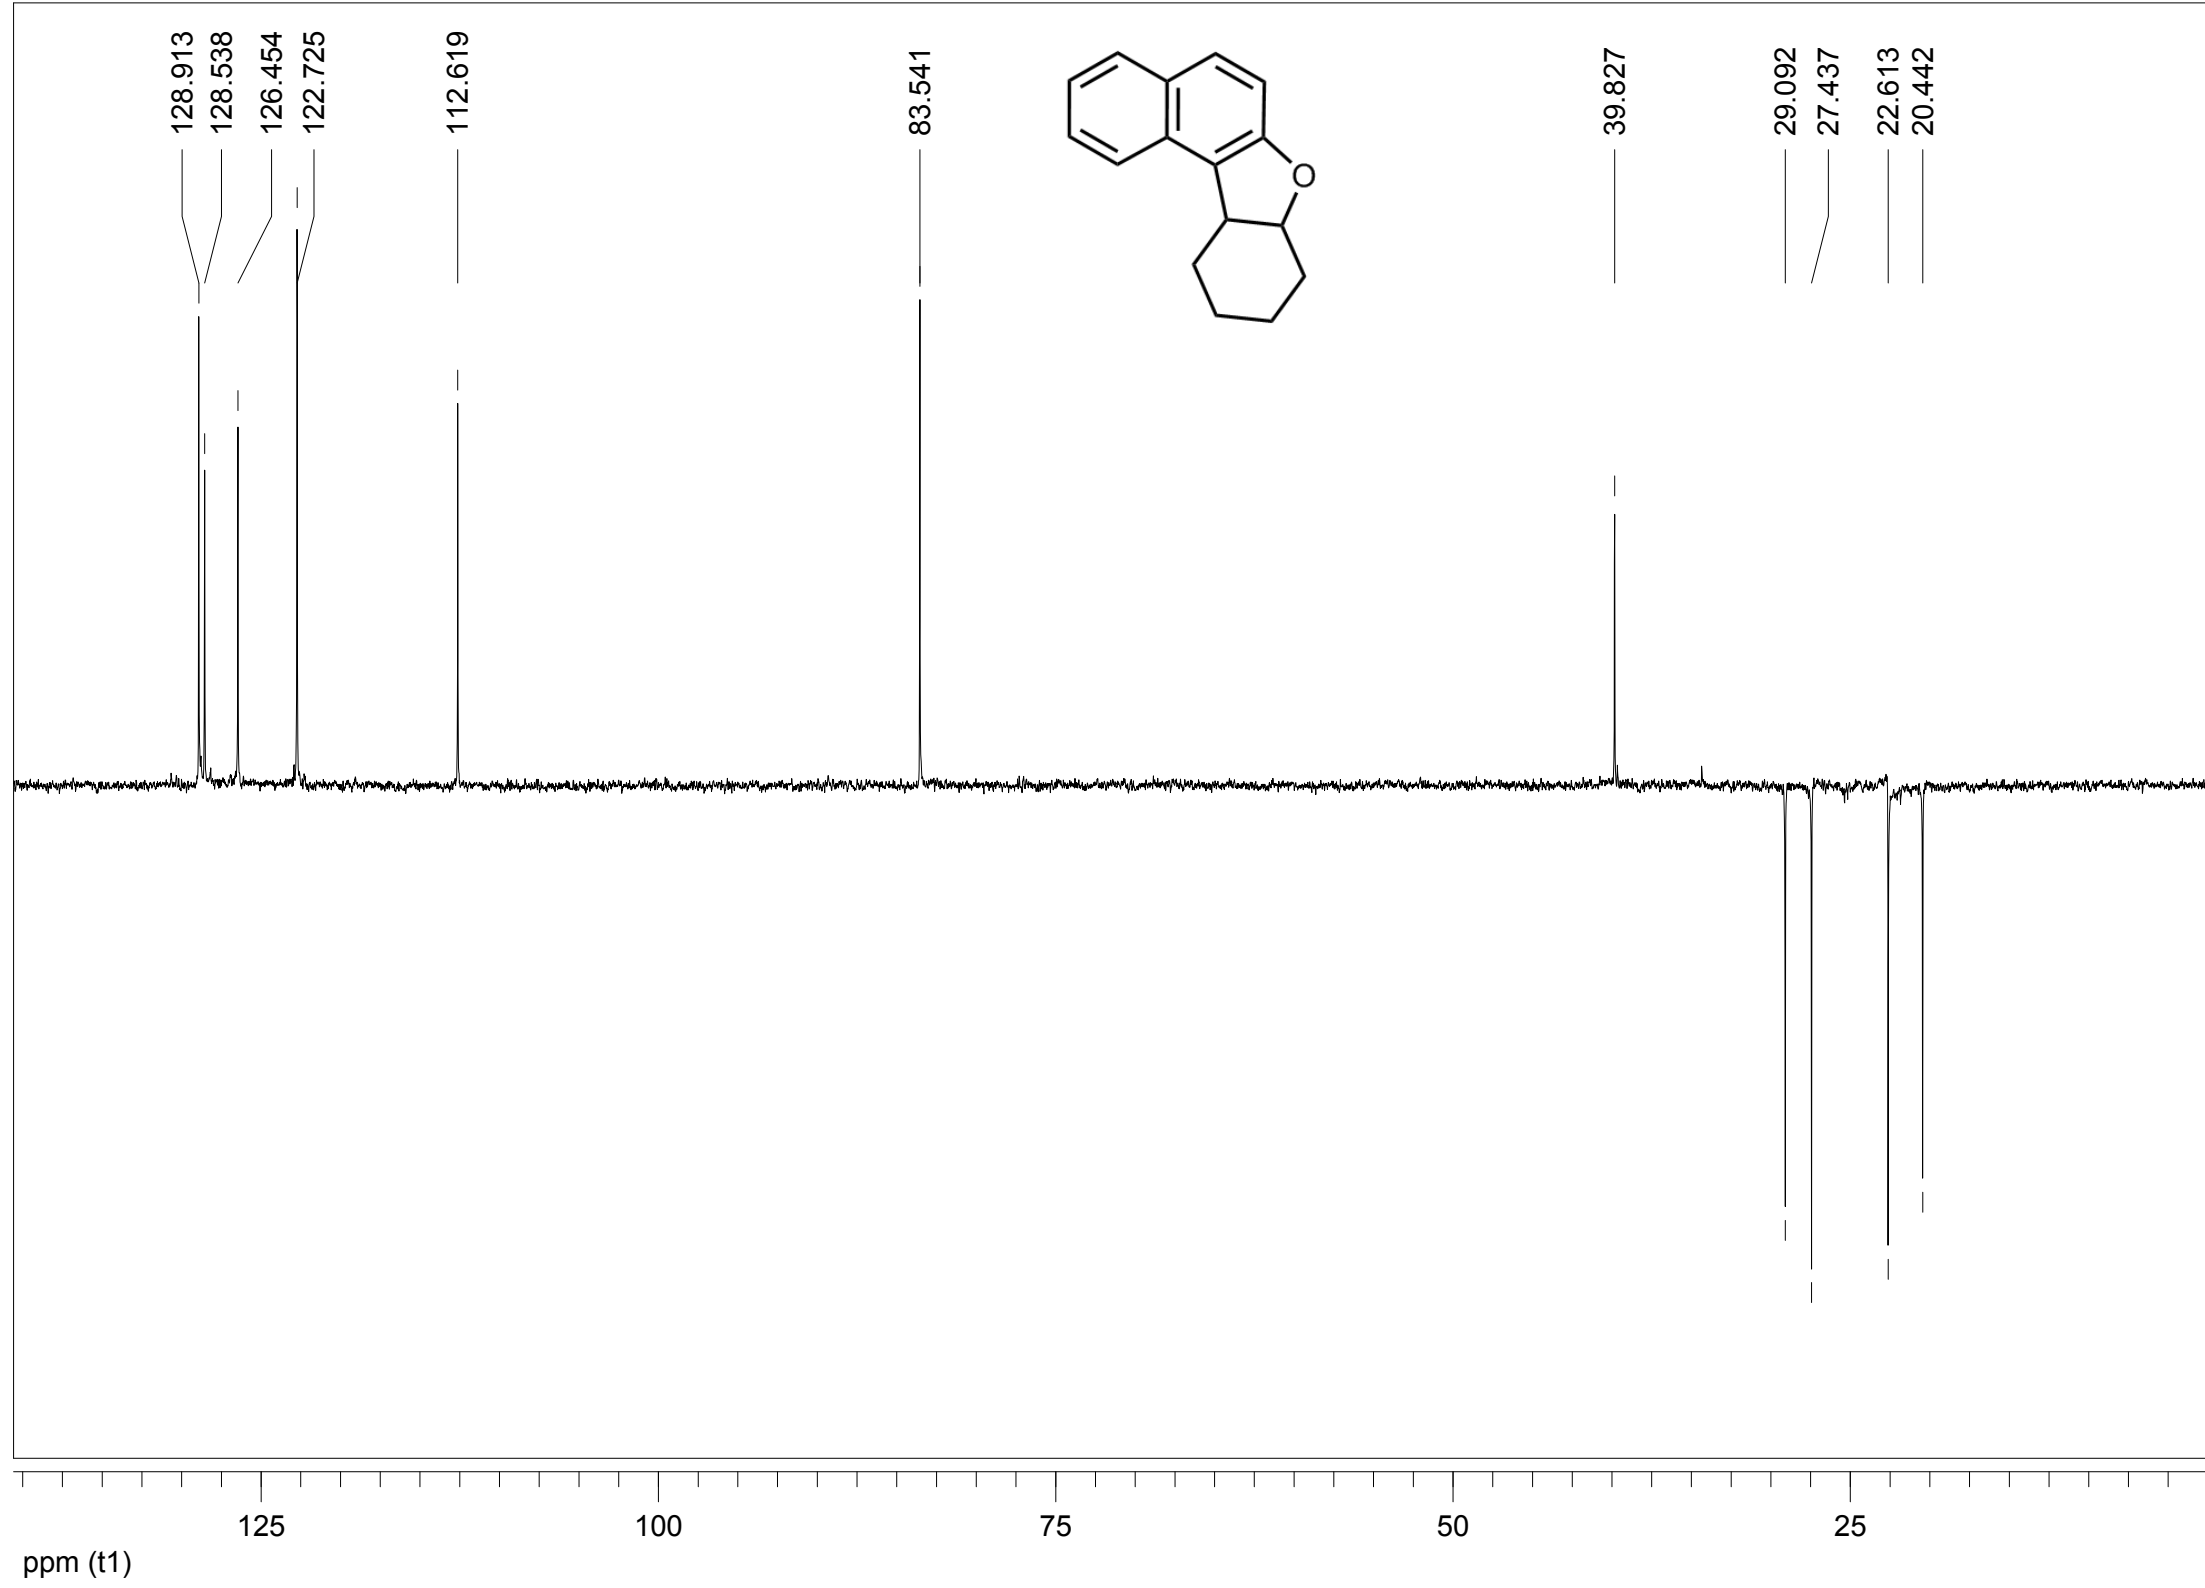

128.913  
128.538  
126.454  
122.725

112.619

83.541

39.827

29.092  
27.437

22.613  
20.442

125

100

75

50

25

ppm (t1)



7.860  
7.684  
7.536  
7.385  
7.187  
7.165  
7.152  
7.129

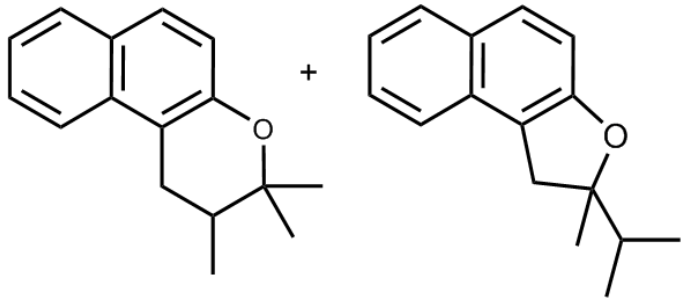

3.477  
3.439  
3.156  
3.118  
2.711  
2.694  
2.167  
1.528  
1.520  
1.277  
1.198  
1.152  
1.135

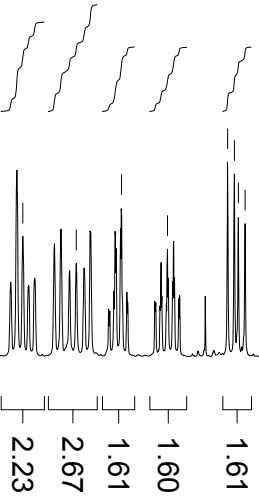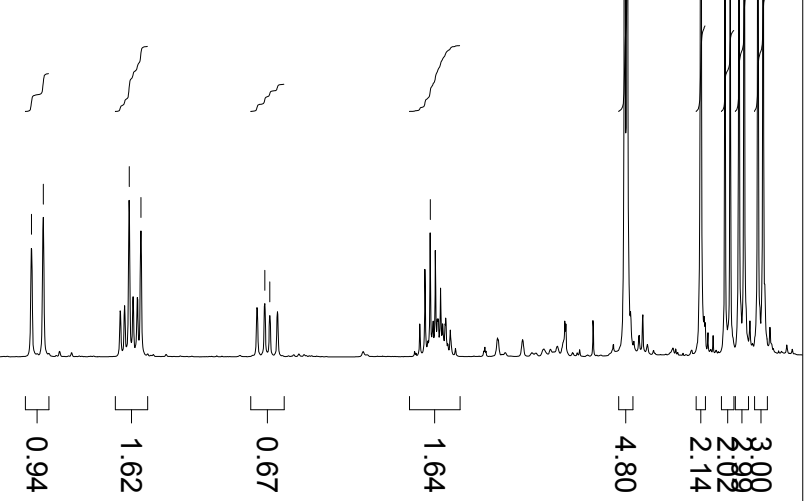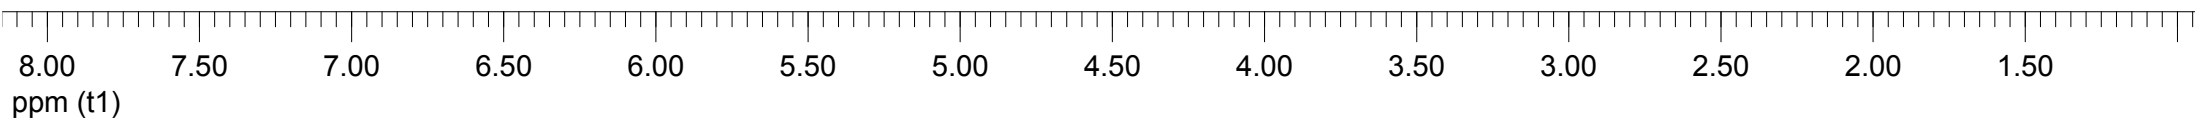

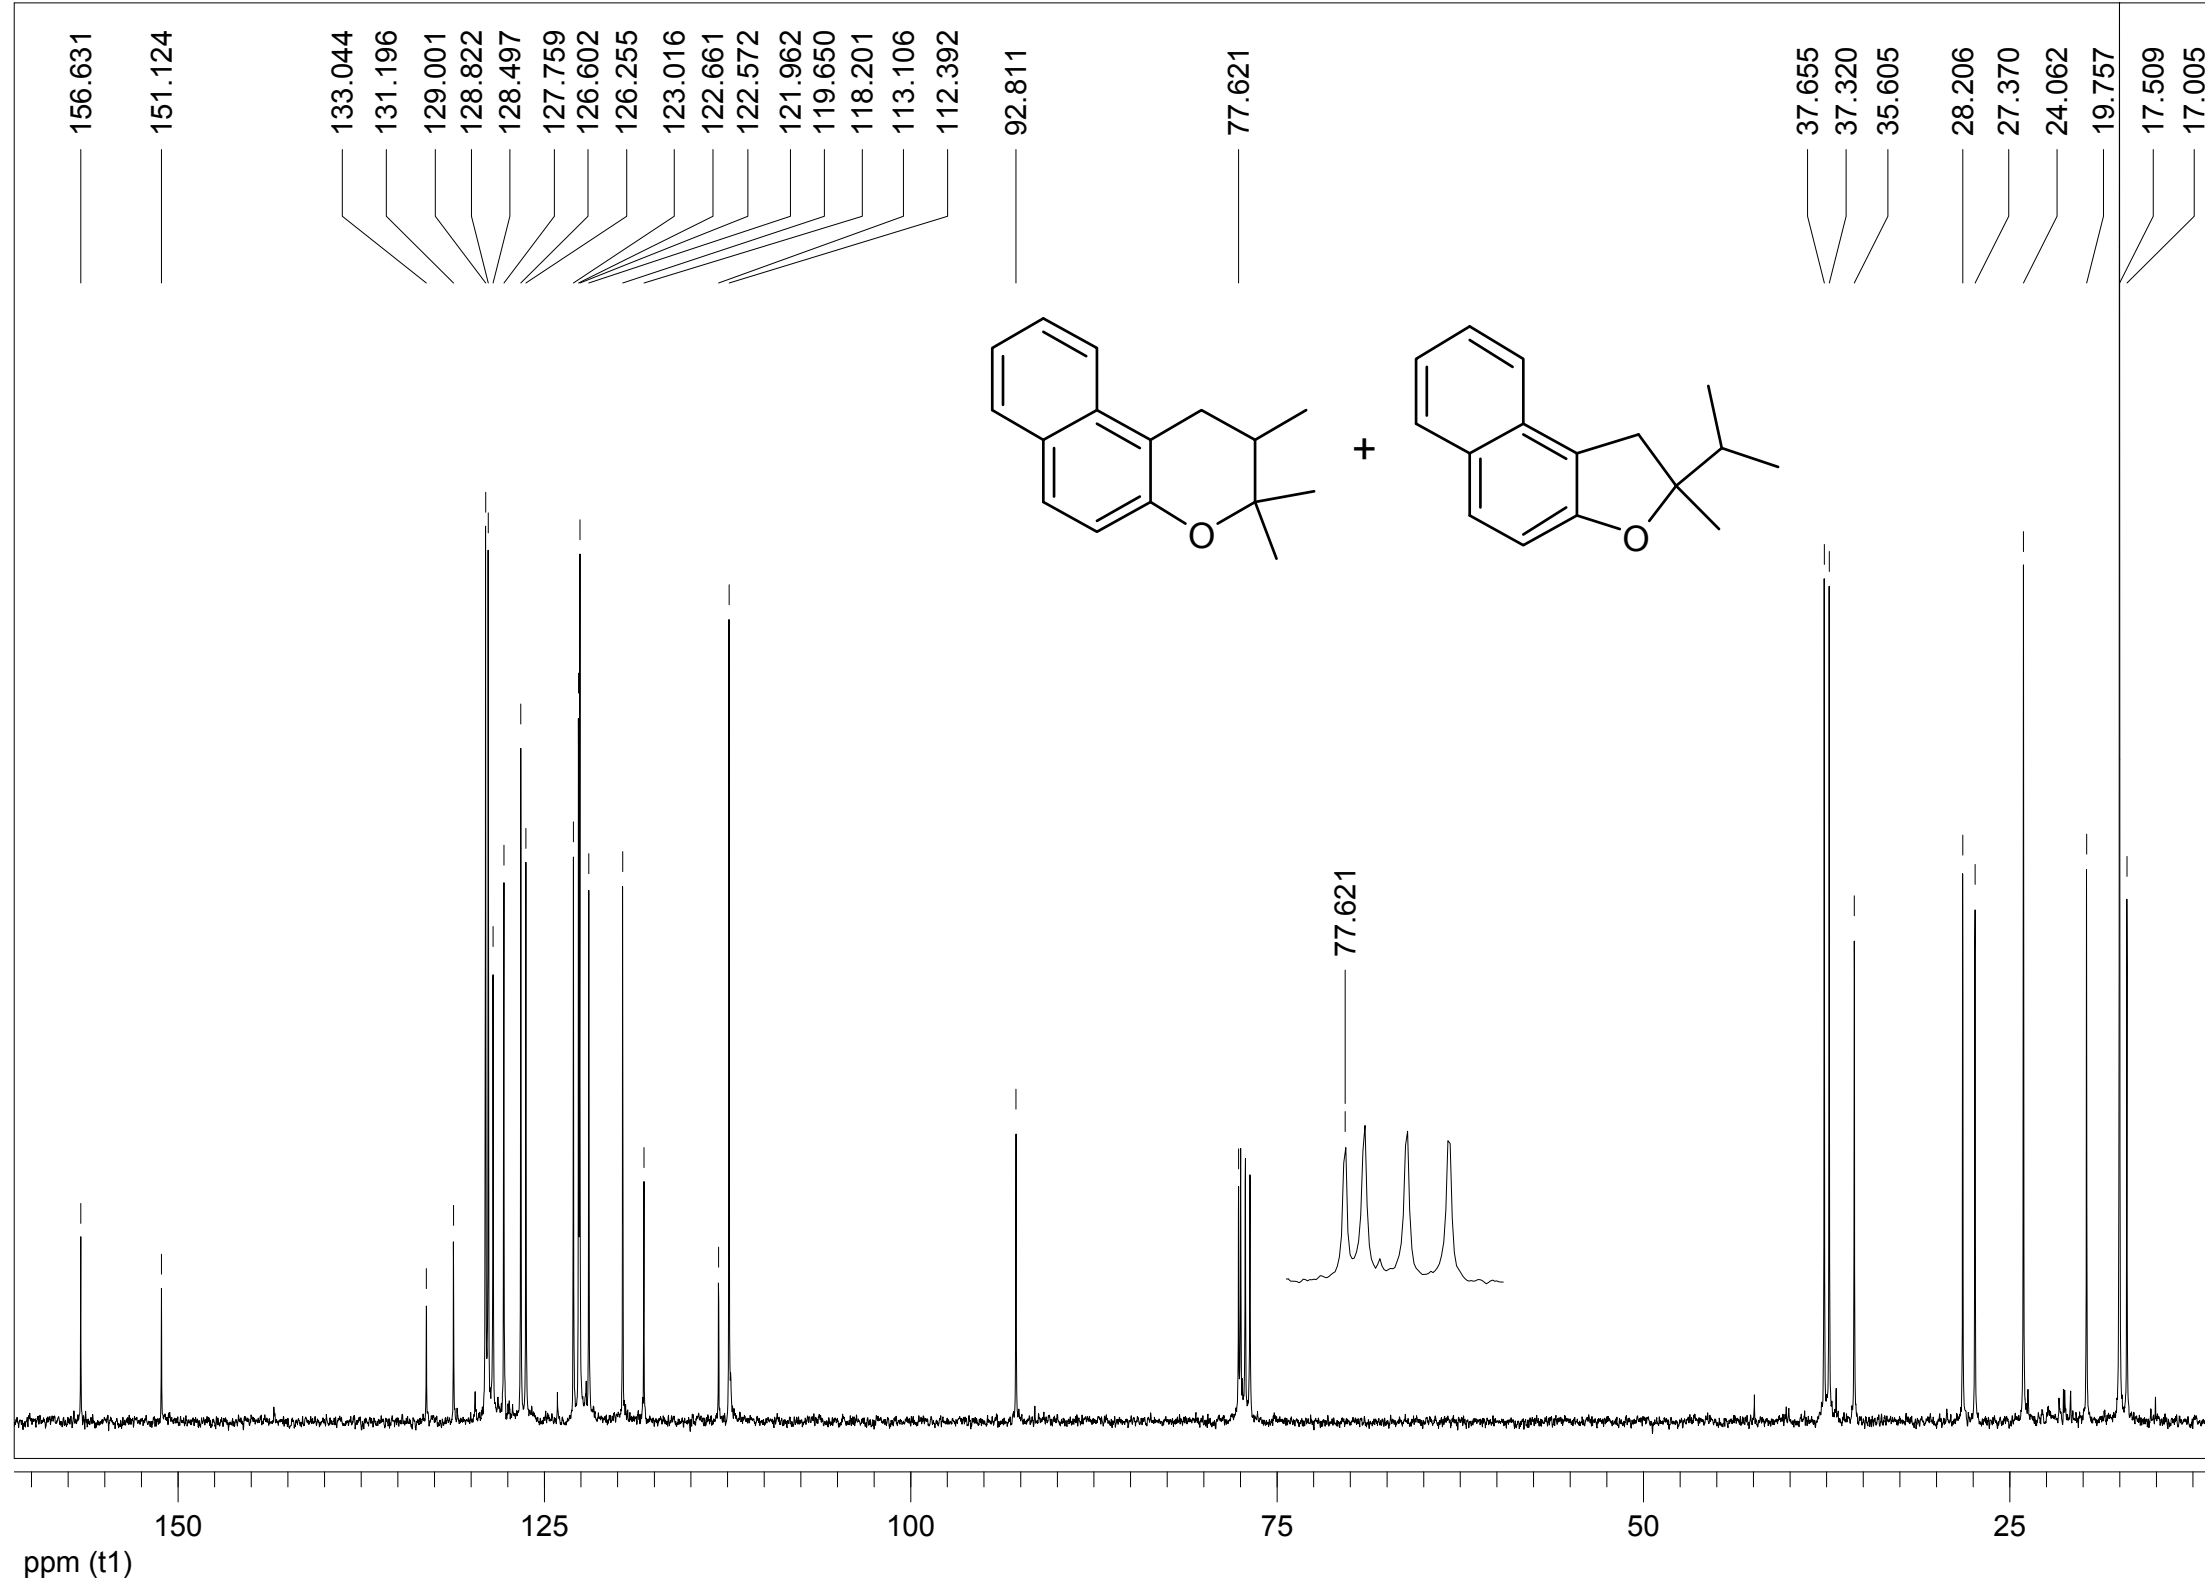

129.001  
128.824  
128.501  
127.760  
126.604  
126.256  
123.017  
122.664  
122.574  
121.963  
119.650  
112.393

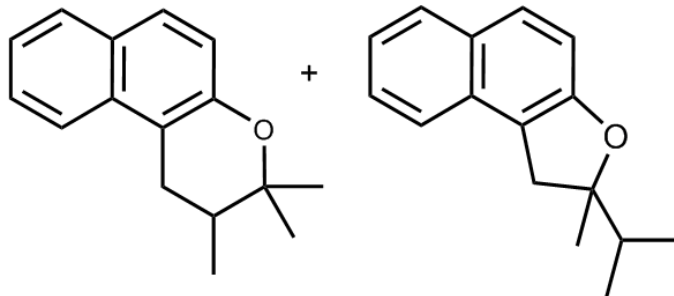

37.653  
37.320  
35.603  
28.206  
27.375  
24.062  
19.755  
17.511  
17.008

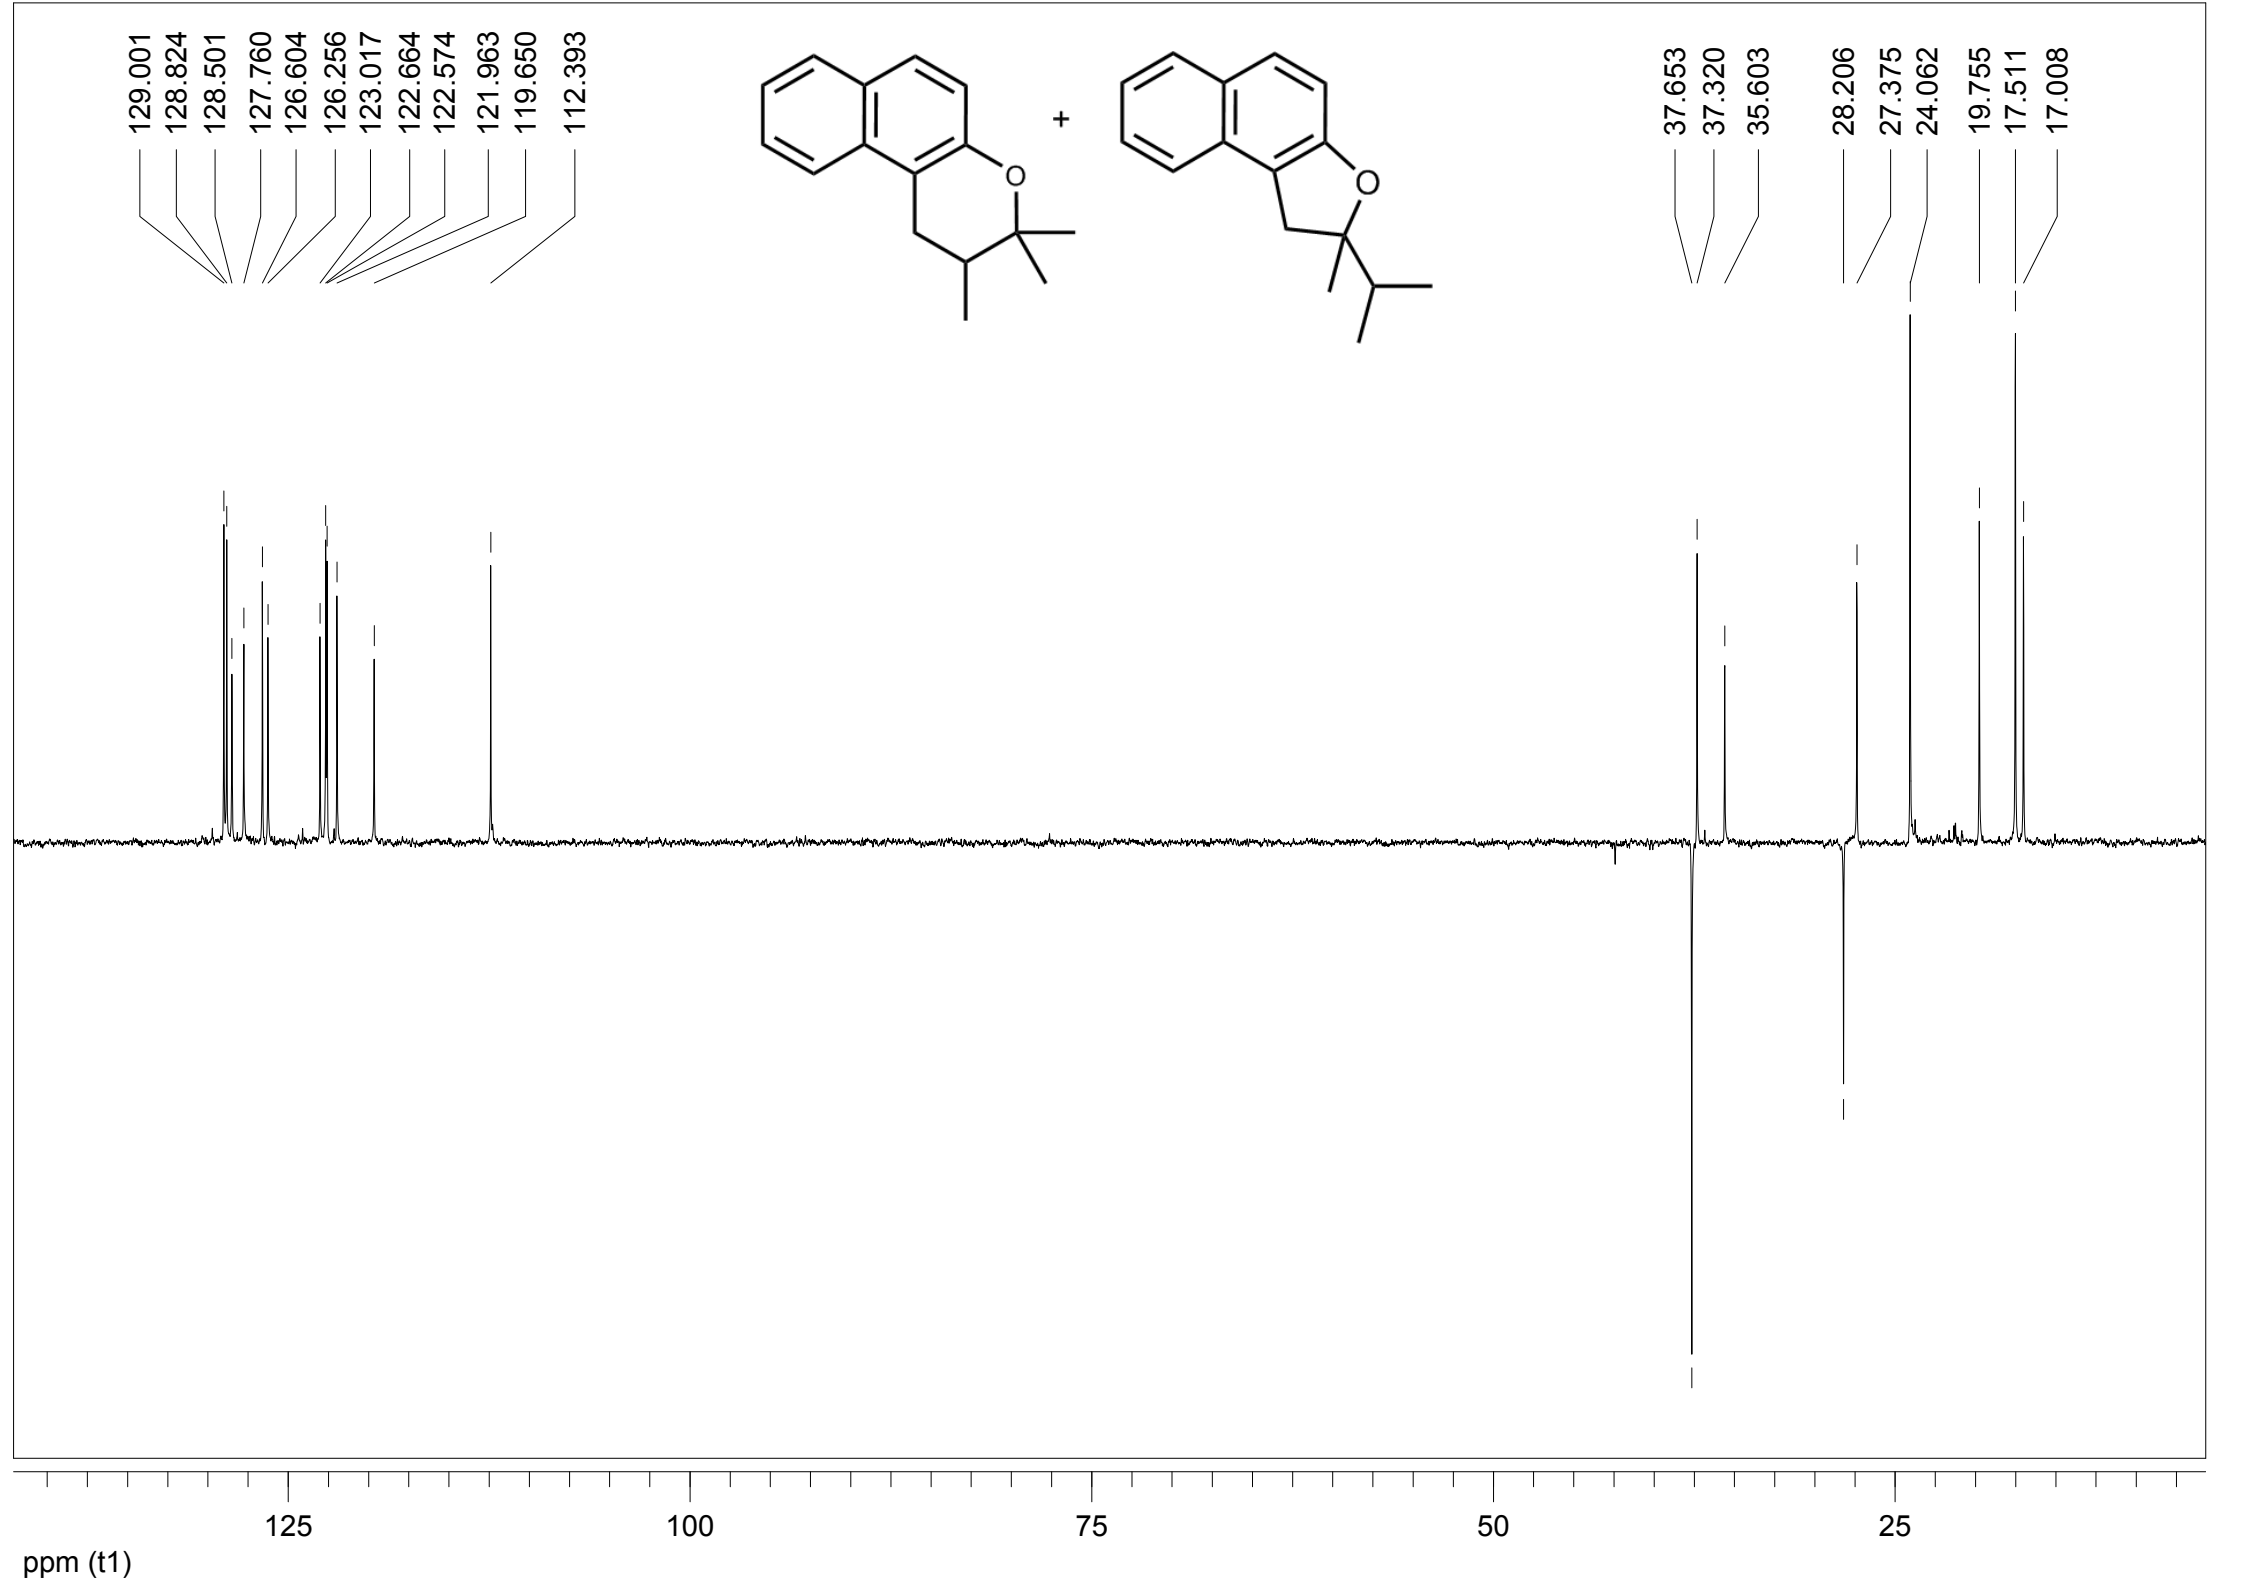

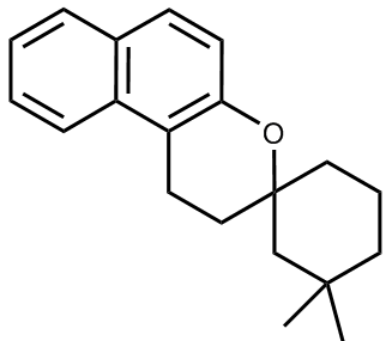

7.916  
7.896  
7.861  
7.841  
7.723  
7.701  
7.574  
7.554  
7.423  
7.167  
7.144

3.099  
3.094

1.946

1.622

1.594

1.584

1.336

1.179

0.981

2.13  
1.04  
1.05  
0.98  
0.84

1.77

11.80

3.00

2.98

ppm (t1)

8.00 7.50 7.00 6.50 6.00 5.50 5.00 4.50 4.00 3.50 3.00 2.50 2.00 1.50 1.00 0.50

151.187  
133.219  
128.554  
127.758  
126.229  
122.989  
121.900  
120.074  
112.931

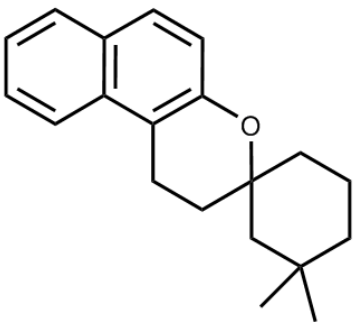

75.283

44.972  
39.512  
35.937  
34.071  
33.843  
30.826  
26.712  
18.826  
18.441  
17.239

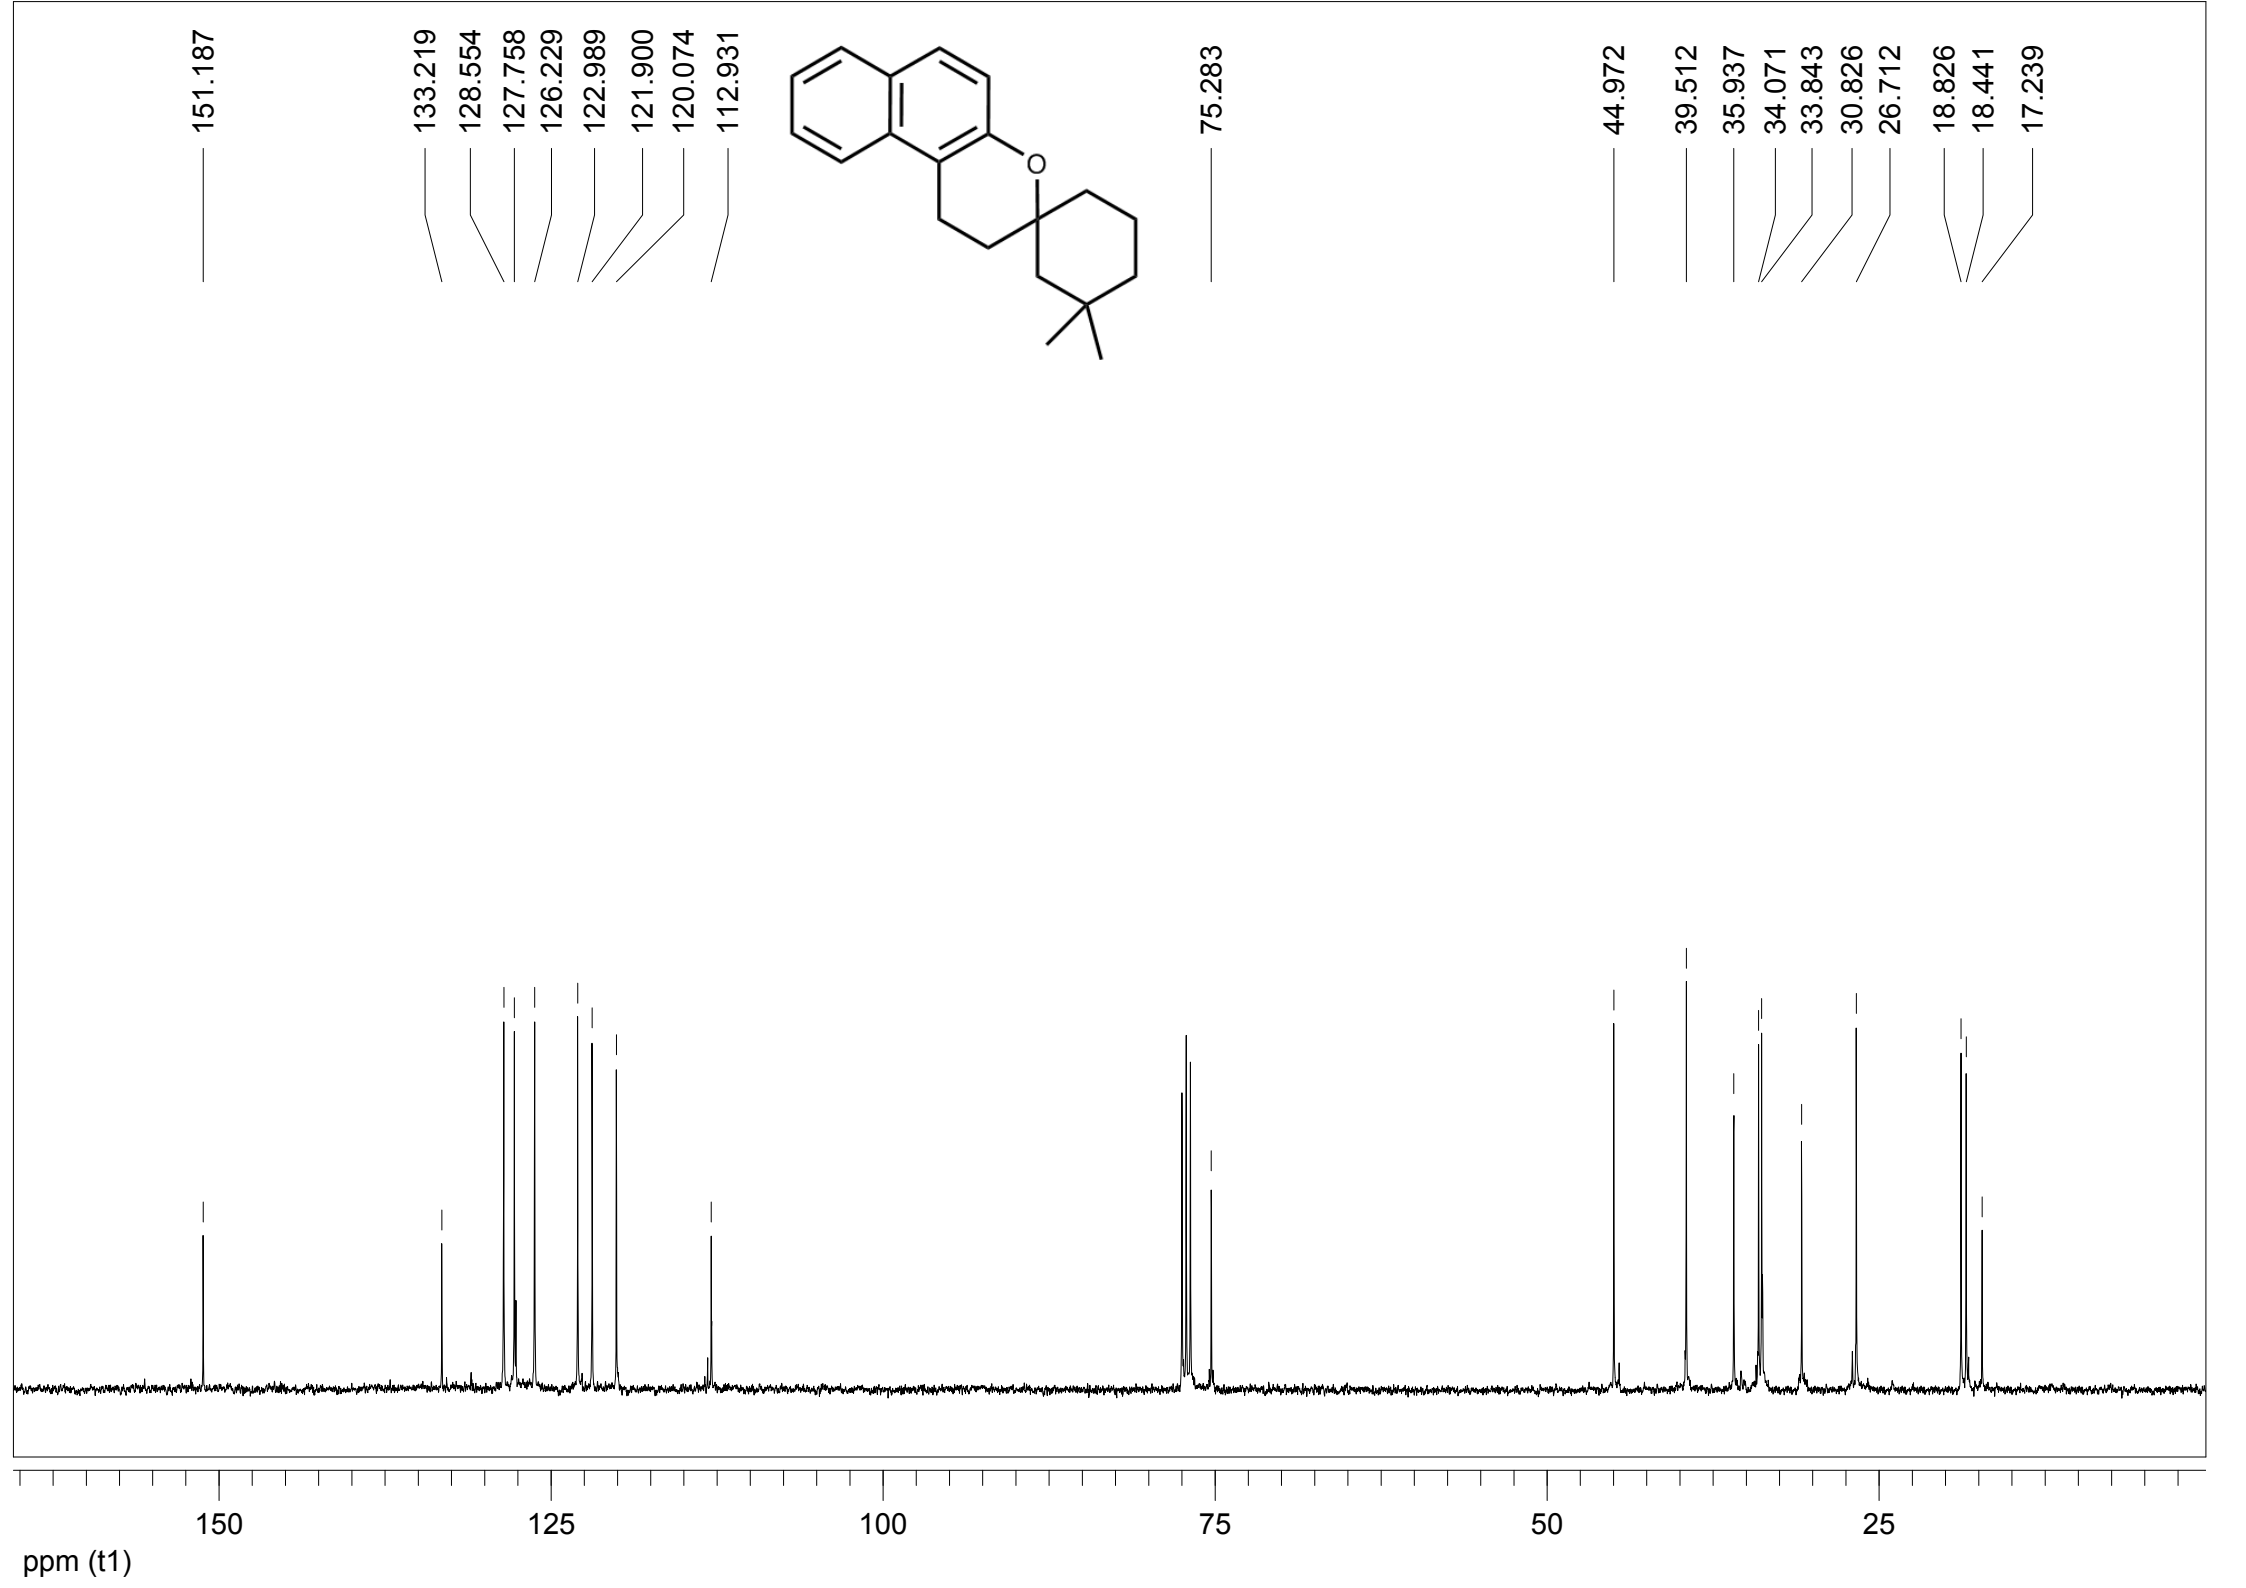

128.518  
127.759  
126.231  
122.990  
121.902  
120.076

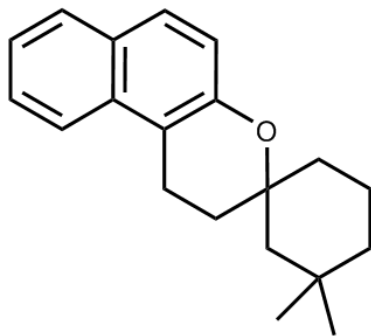

44.969  
39.511  
35.943  
34.077  
33.841  
26.712  
18.828  
18.439

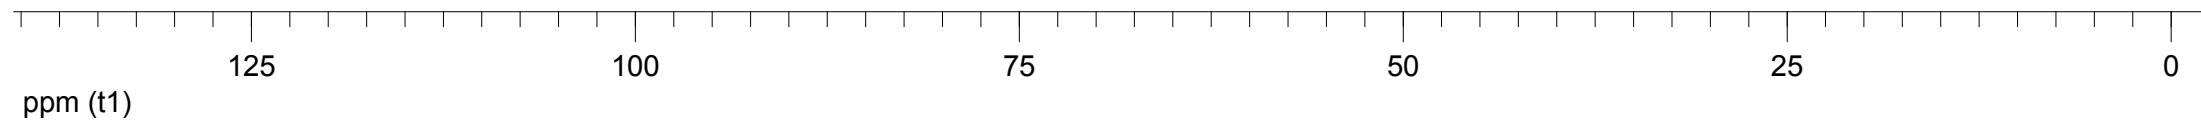

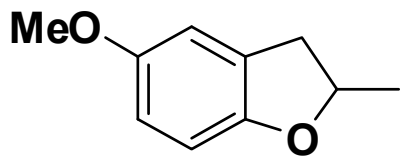

6.749  
6.651

4.900  
4.884

3.749

3.304  
3.282  
3.265  
3.244  
2.823  
2.804  
2.785  
2.765

1.461  
1.445

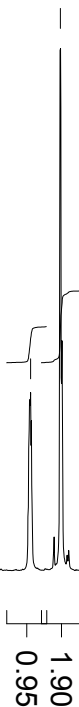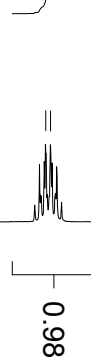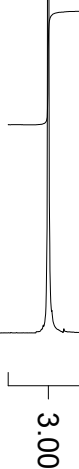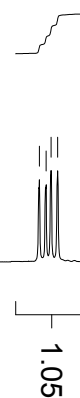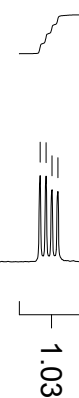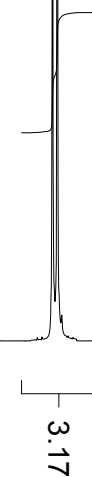

0.95  
1.90

0.96

3.00

1.05

1.03

3.17

ppm (t1)

7.00 6.50 6.00 5.50 5.00 4.50 4.00 3.50 3.00 2.50 2.00 1.50 1.00 0.50
